# Supplementary material
Source: PubMed Central journal article supplement (PMC4117372)
Supplement: NIHMS603607-supplement-Suppl_Data.pdf [file NIHMS603607-supplement-Suppl_Data.pdf]

## Stability of Cyclic Imine Toxins: Interconversion of Pinnatoxin Amino Ketone and Pinnatoxin A in Aqueous Media

Jeffrey J. Jackson,<sup>†</sup> Craig E. Stivala,<sup>1†</sup> Bogdan I. Iorga,<sup>‡</sup> Jordi Molgó,<sup>§</sup> and Armen Zakarian<sup>\*,†</sup>

<sup>†</sup> Department of Chemistry and Biochemistry, University of California, Santa Barbara, California 93106-9510

<sup>‡</sup> CNRS, Institut de Chimie des Substances Naturelles, UPR-2301, Centre de Recherche de Gif, Labex LERMIT, F-91198 Gif-sur-Yvette cedex, France

<sup>§</sup> CNRS, Institut de Neurobiologie Alfred Fessard - FRC2118, Laboratoire de Neurobiologie et Développement - UPR-3294, F-91198 Gif-sur-Yvette cedex, France

Contact: zakarian@chem.ucsb.edu

### SUPPORTING INFORMATION

#### GENERAL PROCEDURES, SPECTRAL DATA, COMPUTATION DATA

##### Table of Contents:

|                                                          |     |
|----------------------------------------------------------|-----|
| General experimental procedures                          | S2  |
| Optimization of the azide reduction protocol             | S2  |
| Structure of S1                                          | S4  |
| Copies of <sup>1</sup> H and <sup>13</sup> C NMR spectra | S5  |
| Computation data                                         | S10 |

---

<sup>1</sup> Current address: Department of Chemistry, Stanford University, Stanford, CA 94305

**Experimental Information:**

All reactions were carried out under an inert atmosphere of dry argon in oven or flame-dried glassware, unless the reaction procedure states otherwise. Tetrahydrofuran (THF) and diethylether (Et<sub>2</sub>O) were distilled from sodium-benzophenone in a continuous still under an atmosphere of argon. Dichloromethane, diisopropylamine, pyridine, triethylamine, and chlorotrimethylsilane were distilled from calcium hydride in a continuous still under an atmosphere of argon. Chlorotriethylsilane (Et<sub>3</sub>SiCl), and diisopropylethylamine (Hunig's Base) were distilled from calcium hydride under an inert atmosphere of dry argon and stored over calcium hydride. Reaction temperatures were controlled by IKA ETS-D4 fuzzy thermo couples. Room temperature reactions were carried out between 22-24 °C. Analytical thin-layer chromatography (TLC) was performed using pre-coated TLC plates with Silica Gel 60 F<sub>254</sub> (EMD no. 5715-7) and visualized using combinations of UV, anisaldehyde, ceric ammonium molybdate (CAM), potassium permanganate, and iodine staining. Flash column chromatography was performed using 40-63 mm silica gel (Merck, Geduran, no. 11567-1) as the stationary phase. Proton magnetic resonance spectra were recorded at 200, 400, and 500 MHz on Varian Mercury Vx, Varian Unity Inova, and Varian Unity Inova spectrometers, respectively and at 800 MHz on a Bruker Avance II 800 Ultrashield Plus. Carbon magnetic resonance spectra were recorded at 50 MHz, 100 MHz, and 125 MHz on Varian Mercury Vx, Varian Unity Inova, and Varian Unity Inova spectrometers, respectively and at 200 MHz on a Bruker Avance II 800 Ultrashield Plus. All chemical shifts were reported in  $\delta$  units relative to tetramethylsilane. Optical Rotations were measured on a Roudolph Research Analytical AUTOPOL III polarimeter. High Resolution mass spectral data were obtained by the Mass Spectrometry laboratory at the University of California, Santa Barbara.

**Optimization of the azide reduction protocol**

Although many methods are available for azide reduction, the complexity of compound **7** and the presence of sensitive functionality, such as the carbonyl group, allylic hydroxy group, and double bonds, required a careful evaluation of these methods. Commonly used reducing agents for the azido group include: trialkyl- and triarylphosphines (Staudinger reduction), hydrogen-Pd/C, hydrogen-Pd(OH)<sub>2</sub>, hydrogen-5% Pd/CaCO<sub>3</sub> (Lindlar's catalyst), 1,3-propanedithiol, and lithium aluminum hydride. The Staudinger reduction and Pd-catalyzed hydrogenolysis are by far the most popular methods for the reduction of azides. Considering the small scale of our intended experiments and the functional group composition of our substrate, we decided to focus our efforts on phosphine-based reagents and hydrogenolysis in the presence of deactivated palladium catalysts, specifically 5% Pd-CaCO<sub>3</sub> poisoned with lead and 5% Pd-BaSO<sub>4</sub> combinations.

In order to avoid possible difficulties in isolating and purifying small amounts of zwitterionic products, we decided to conduct experiments with the azido ester **9**. TEMPO-catalyzed oxidation of **7** with a stoichiometric amount of PhI(OAc)<sub>2</sub> afforded the aldehyde, which was further oxidized with buffered NaClO<sub>2</sub> to the carboxylic acid **8**. Esterification of the latter with (trimethylsilyl)diazomethane in a mixture of methanol and dichloromethane gave **9** in an overall yield of 86%.

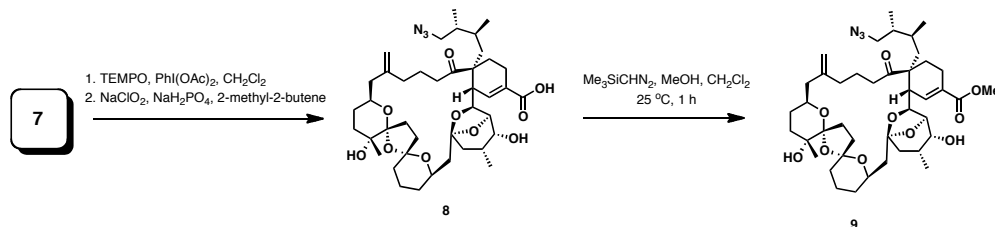**Scheme S1.** Substrates for azide reduction.

Reduction of azido ester **9** to amine **10** with triphenylphosphine was accompanied by the unexpected formation of a substantial amount of urea **11** (Table S1, entries 1-3). Presumably, urea formation takes place through the intermediacy of isocyanate formed by a reaction between the initially formed iminophosphorane **12b** and adventitious carbon dioxide. The fraction of **11** in the product mixture could be reduced by performing the Staudinger reduction in the presence of triethylamine (Table 1, entry 2); however, upon scale up to 17 mg (Table S1, entry 3), only the C<sub>2</sub>-symmetric urea **11** was formed. Staudinger reductions with trimethylphosphine afforded iminophosphorane **12b** exclusively (entry 4, Me<sub>3</sub>P in place of Ph<sub>3</sub>P), which was stable to hydrolysis even after heating at 55 °C for 22 h.

In contrast to the results with the phosphine reagents, a hydrogenolysis approach proved to be much more successful in delivering the primary amines (**2** and **10**) selectively (Table S1, entries 5-7). Replacing quinoline with pyridine as an additive improved product isolation.<sup>1</sup> Both the Lindlar catalyst and 5% Pd-BaSO<sub>4</sub> are effective hydrogenolysis catalysts. No urea byproducts were observed in any hydrogenation reactions.

**Table S1.** Reduction of azide to amine: search for optimal conditions.<sup>a</sup>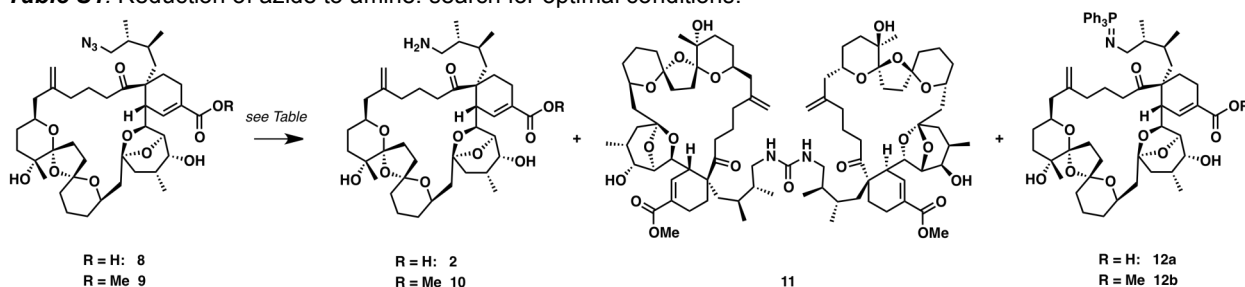

| entry          | substrate, (R) | reagent                                                         | Conditions                                                        | products (%)   |           |                          |
|----------------|----------------|-----------------------------------------------------------------|-------------------------------------------------------------------|----------------|-----------|--------------------------|
|                |                |                                                                 |                                                                   | <b>2 or 10</b> | <b>11</b> | <b>12a,b<sup>c</sup></b> |
| 1              | <b>9 (Me)</b>  | Ph <sub>3</sub> P (1.5 equiv)                                   | THF-H <sub>2</sub> O (3:1), 55 °C, 24 h                           | 50             | 50        | 0                        |
| 2              |                | Ph <sub>3</sub> P (2.5 equiv)<br>Et <sub>3</sub> N (15 equiv)   | THF-H <sub>2</sub> O (3:1), 55 °C, 5 h                            | 70             | 30        | 0                        |
| 3 <sup>b</sup> |                | Ph <sub>3</sub> P (1.2 equiv)<br>Et <sub>3</sub> N (15 equiv)   | THF-H <sub>2</sub> O (3:1), 55 °C, 5 h                            | 0              | 100       | 0                        |
| 4              |                | Me <sub>3</sub> P (15 equiv)                                    | THF-H <sub>2</sub> O (3:1), 55 °C, 24 h                           | 0              | 0         | 100                      |
| 5              |                | H <sub>2</sub> , Lindlar catalyst<br>quinoline (10 equiv)       | EtOH, 20 °C, 20 min.                                              | 100            | 0         | 0                        |
| 6              |                | H <sub>2</sub> , Lindlar catalyst<br>pyridine (10 equiv)        | EtOH, 20 °C, 20 min.                                              | 100            | 0         | n/a                      |
| 7              |                | H <sub>2</sub> , 5% Pd-BaSO <sub>4</sub><br>pyridine (10 equiv) | EtOH, 20 °C, 20 min.                                              | 100            | 0         | n/a                      |
| 8              | <b>8 (H)</b>   | Me <sub>3</sub> P (7 equiv)                                     | THF-H <sub>2</sub> O (9:1), 20 °C, 60 h                           | 15             | 0         | 85                       |
| 9              |                | Ph <sub>3</sub> P (14 equiv)                                    | THF-H <sub>2</sub> O (9:1), 55 °C, 60 h                           | 0              | 0         | 100                      |
| 10             |                | Ph <sub>3</sub> P (10 equiv)                                    | THF-H <sub>2</sub> O-28% aq. NH <sub>3</sub> (28:7:1), 55 °C, 7 h | 100            | 0         | 0                        |
| 11             |                | H <sub>2</sub> , Lindlar catalyst                               | EtOH, 20 °C, 36 h                                                 | 100            | 0         | n/a                      |

<sup>a</sup> reactions were generally performed on 1-3 mg (1-4 mmol) scale. <sup>b</sup> performed on 17 mg scale. A small amount (0.7 mg) of **12a** was isolated by reverse-phase HPLC and characterized by <sup>1</sup>H NMR and mass-spectroscopy only.

Azide reductions of carboxylic acid substrate **8** were investigated next (Table 2, entries 8-11). Formation of rather stable iminophosphorane products **12a** with trimethyl- or triphenylphosphine was surprising; the iminophosphorane derived from  $\text{Ph}_3\text{P}$  was isolated in 68% yield after reverse-phase HPLC purification. Addition of ammonia accelerated hydrolysis of intermediate iminophosphorane providing amino acid **2** as a sole identifiable product. Hydrogenolysis of carboxylic acid **8** with Lindlar catalyst delivered amino acid **2** directly and required 36 h to reach completion.<sup>2</sup> However, the product could only be isolated in 35% yield after reverse-phase HPLC purification. Ultimately, we determined that the optimal procedure for the synthesis of PnTX AK (**2**) involved a two-step approach. Azido methyl ester **9** was subjected to hydrogenolysis in the presence of 5% Pd- $\text{BaSO}_4$  and pyridine, which was followed by saponification of the amino methyl ester **10** with lithium hydroxide in aqueous THF and purification by reverse-phase HPLC. This protocol afforded 5.1 mg of pure amino acid **2** from 6.3 mg of **9** (85% isolated yield).

### Structure of **S1**:

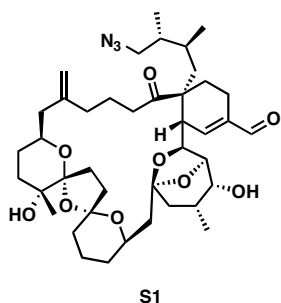

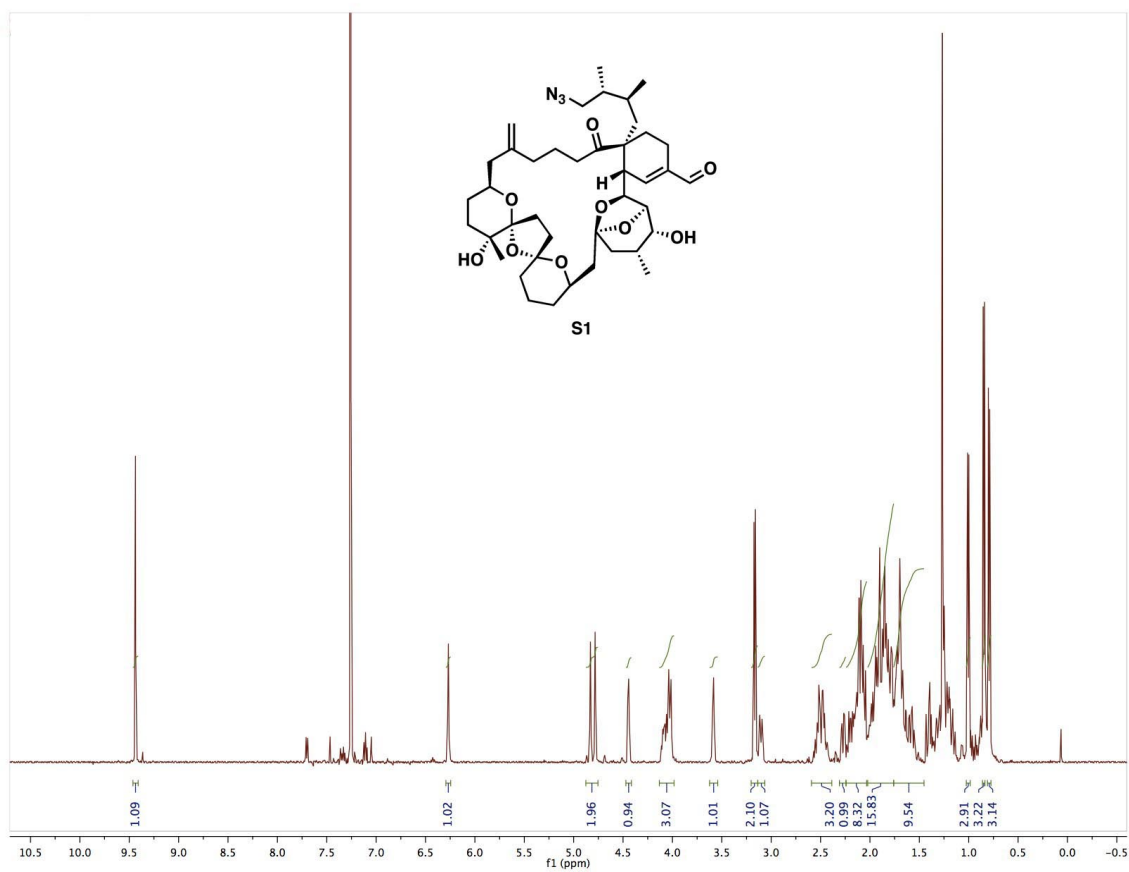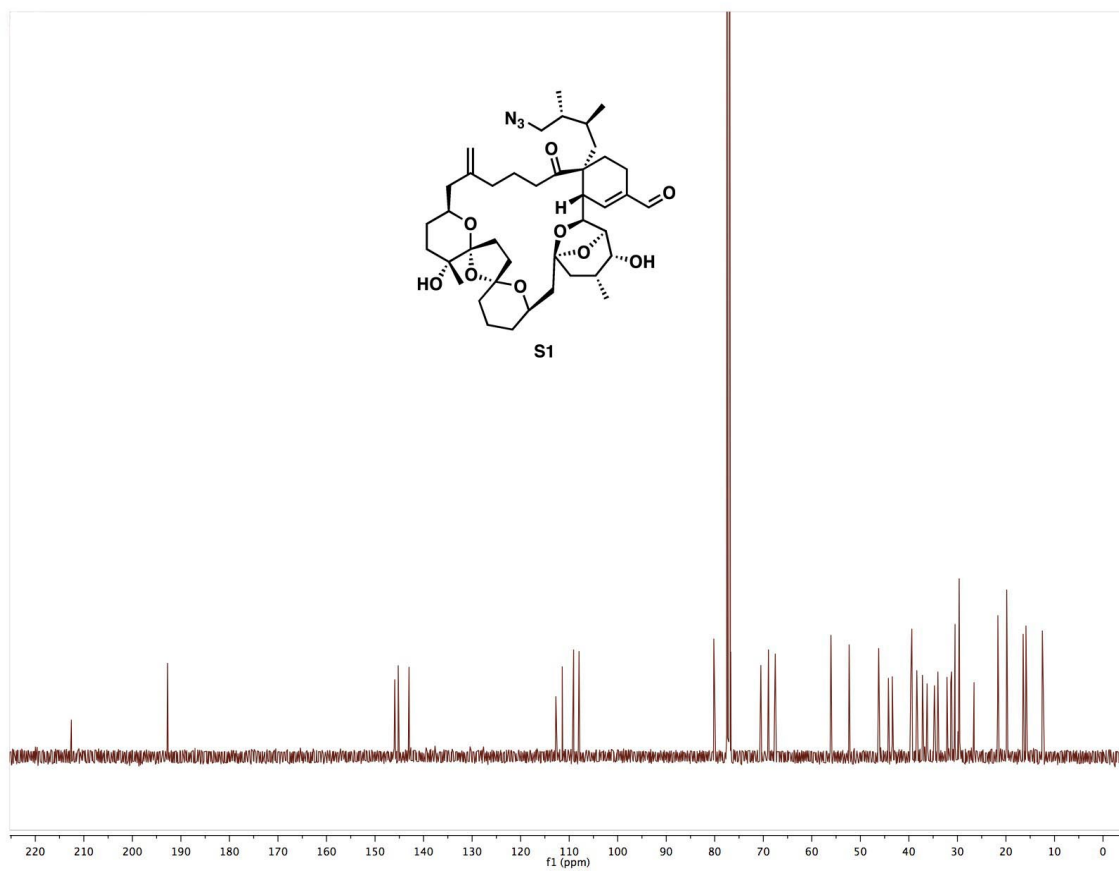

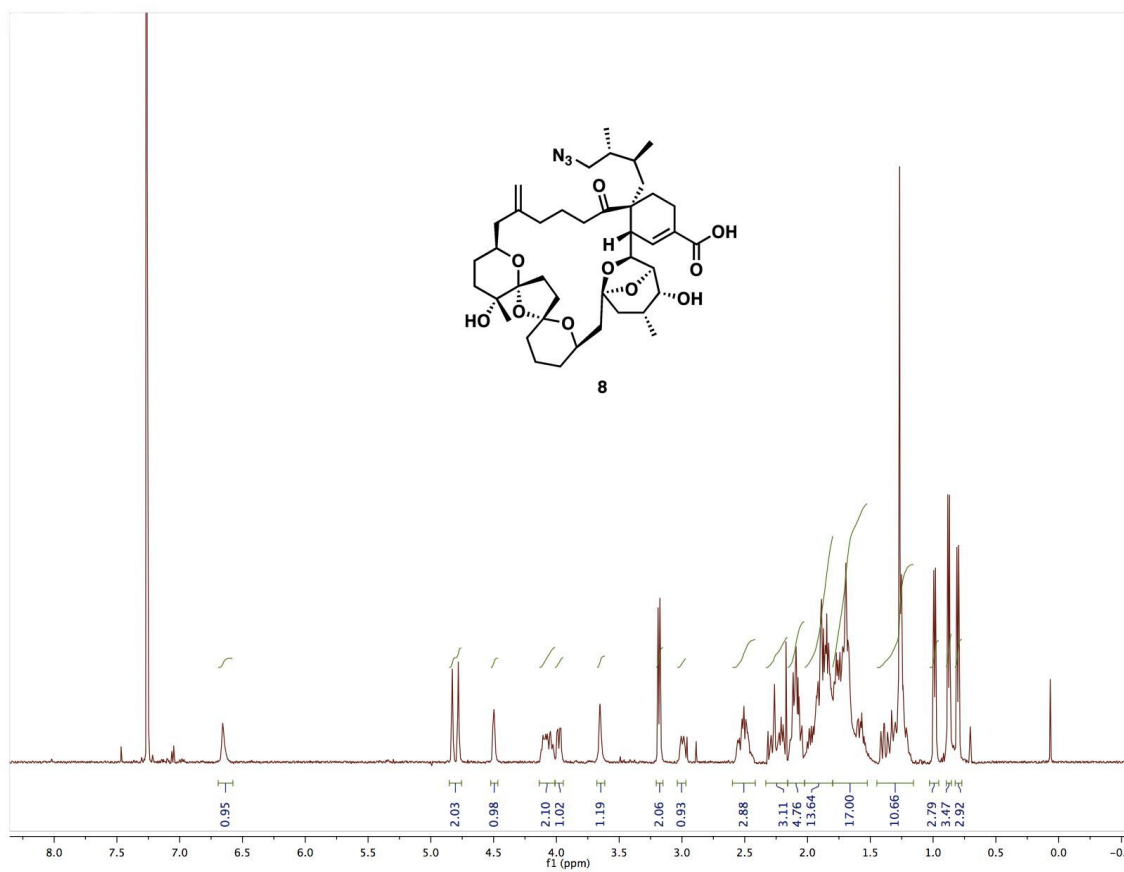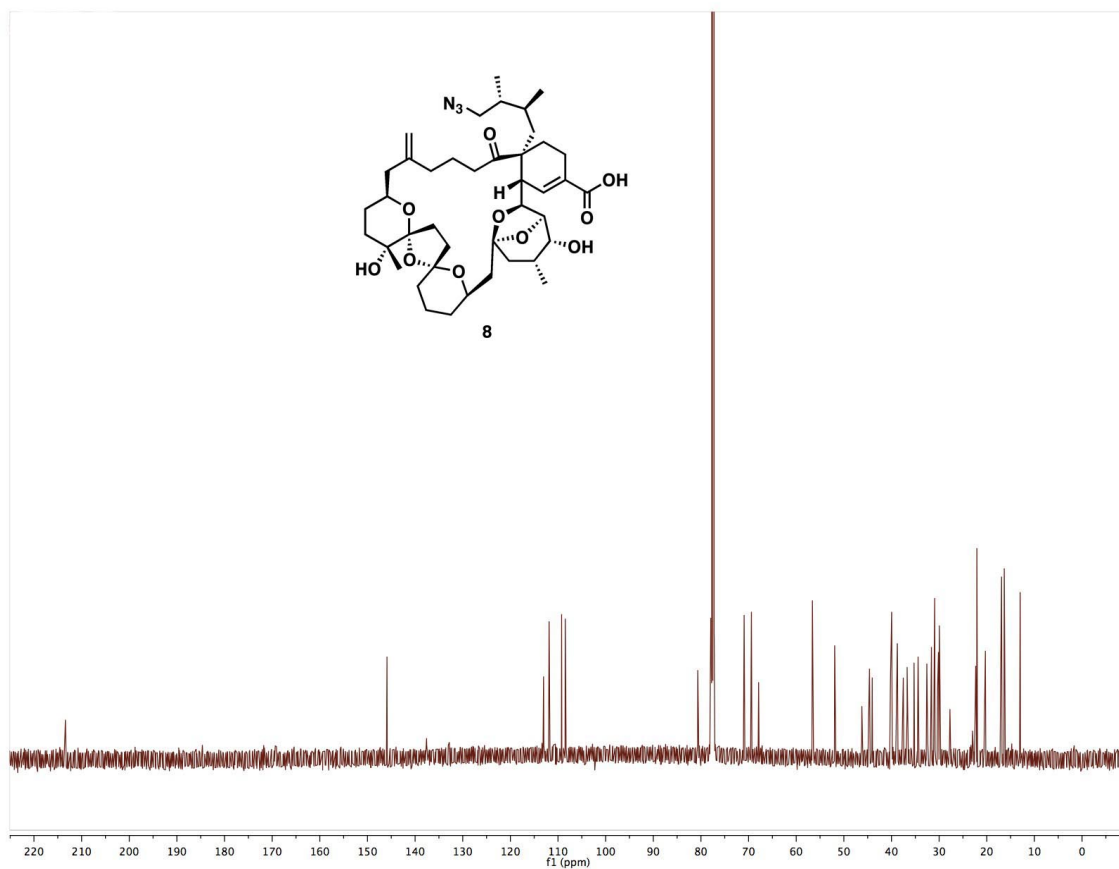

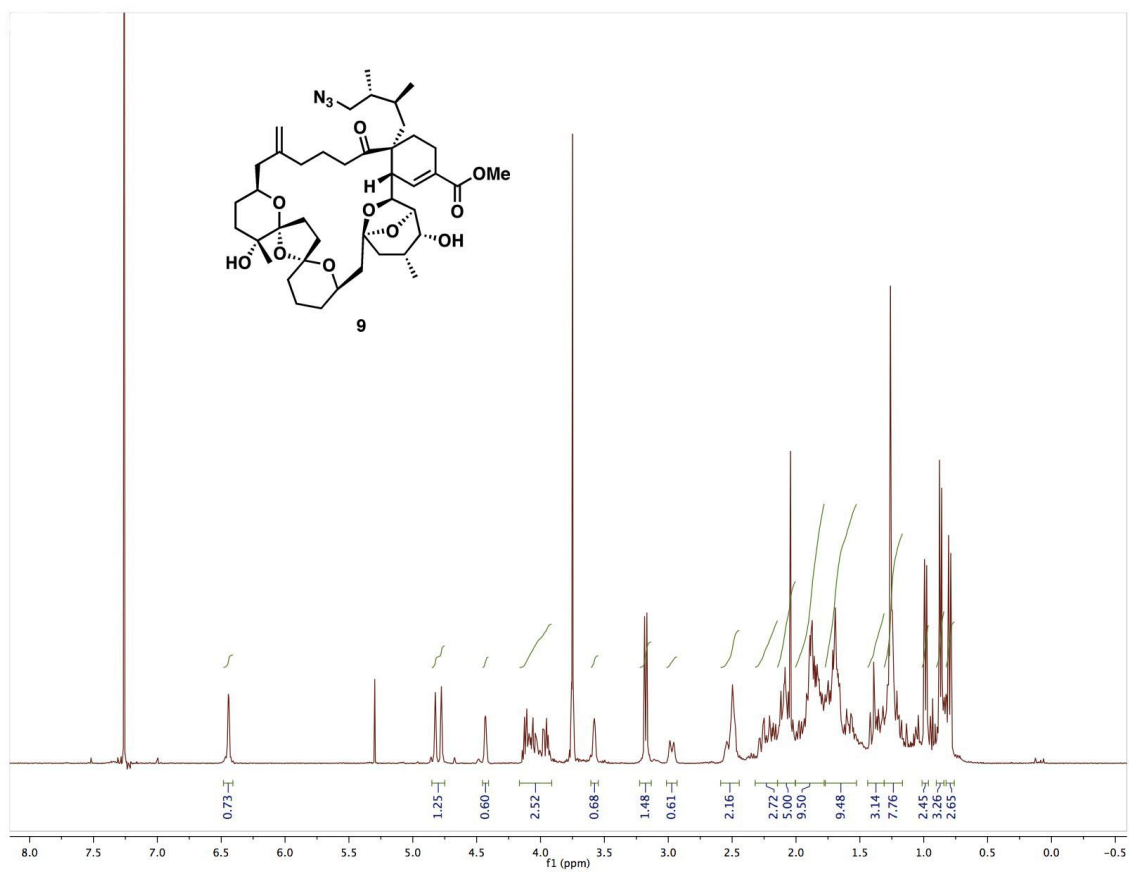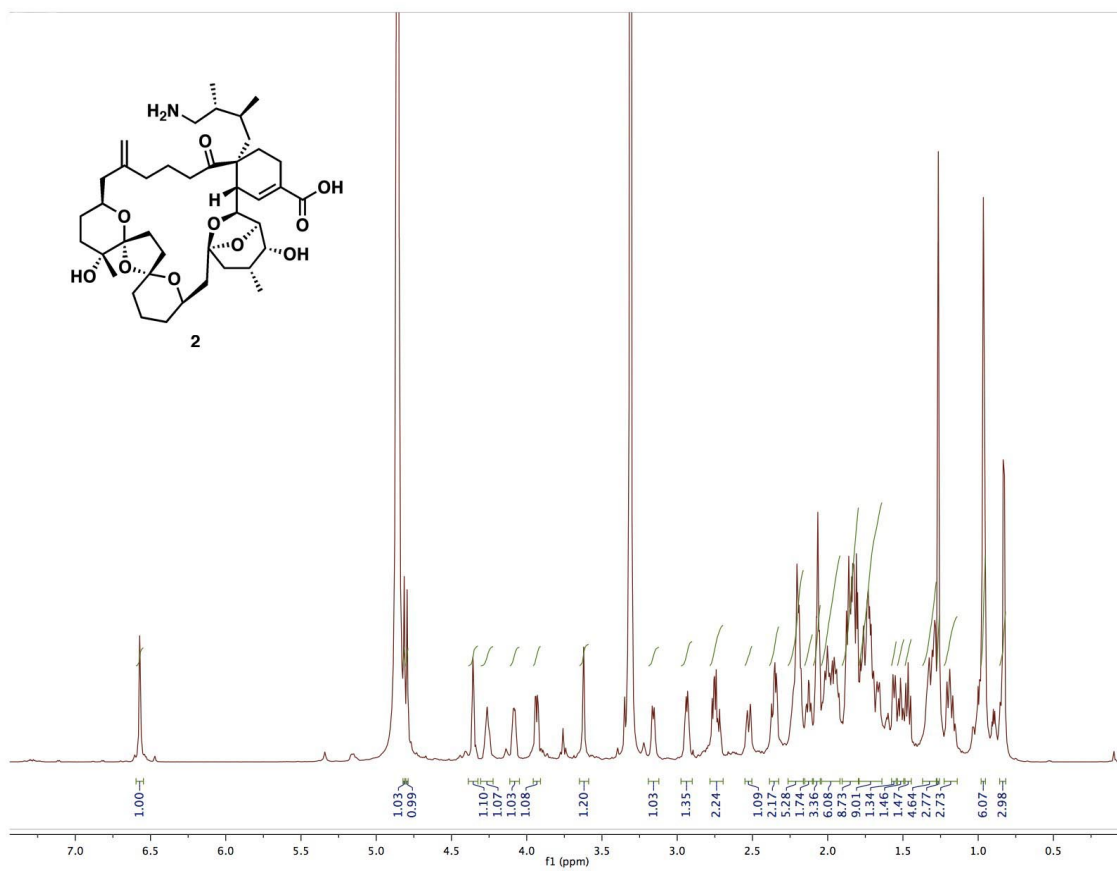

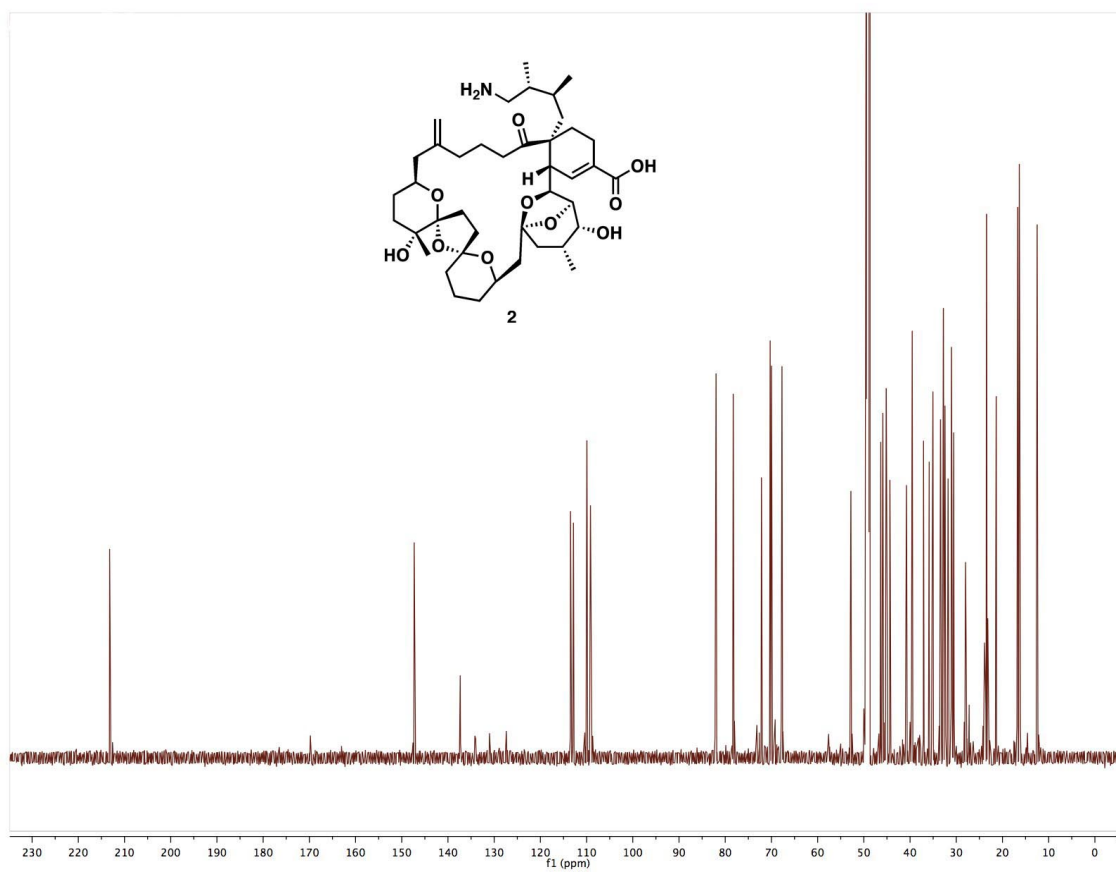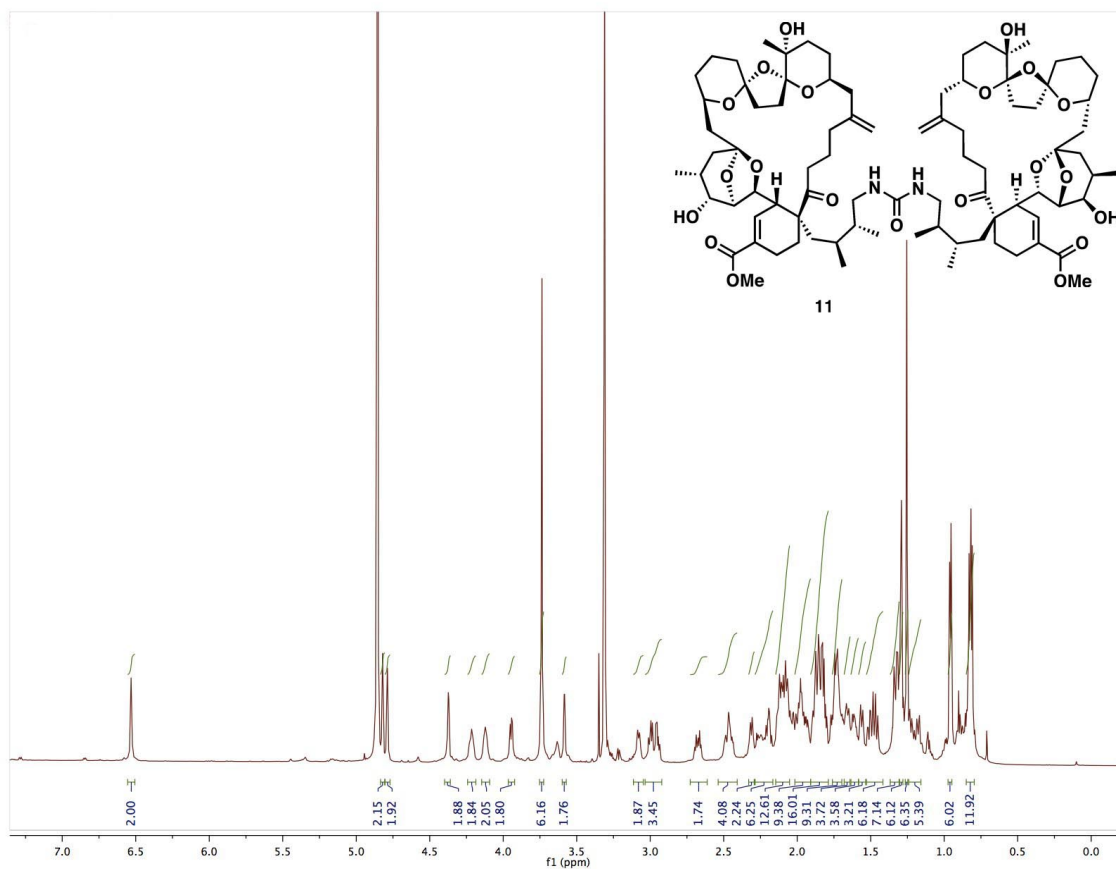



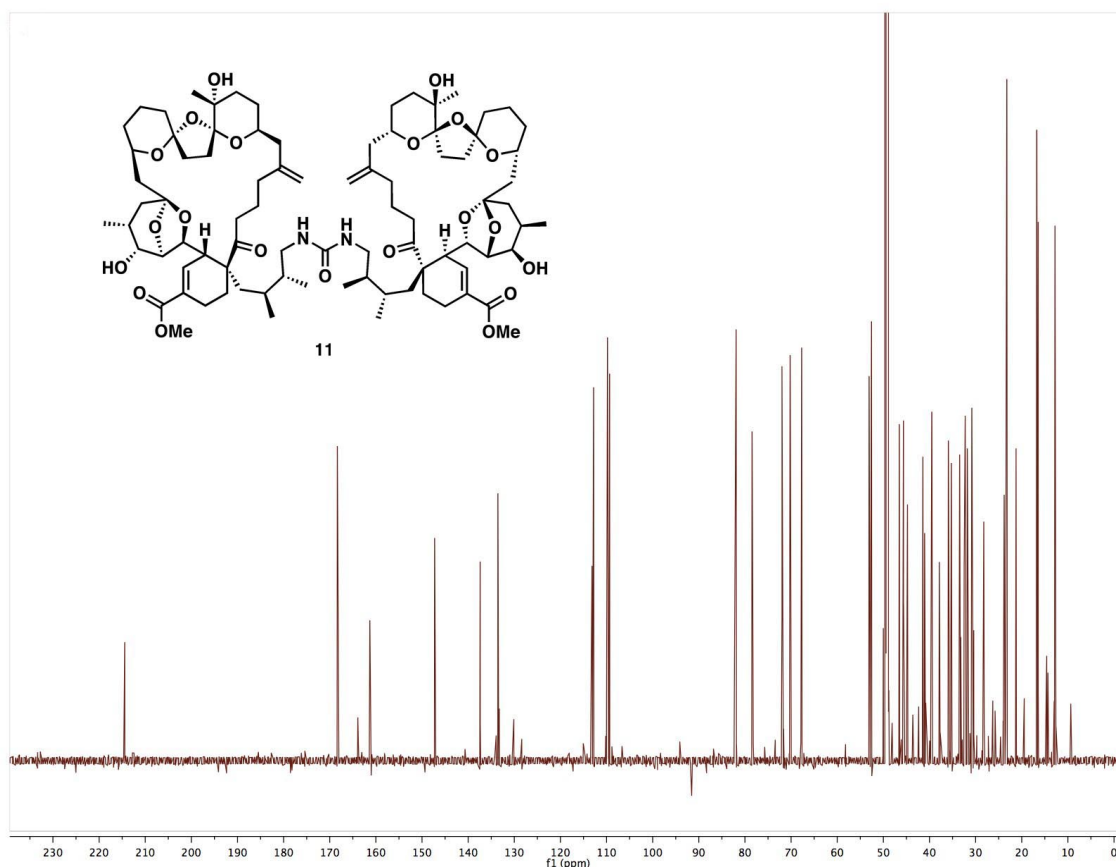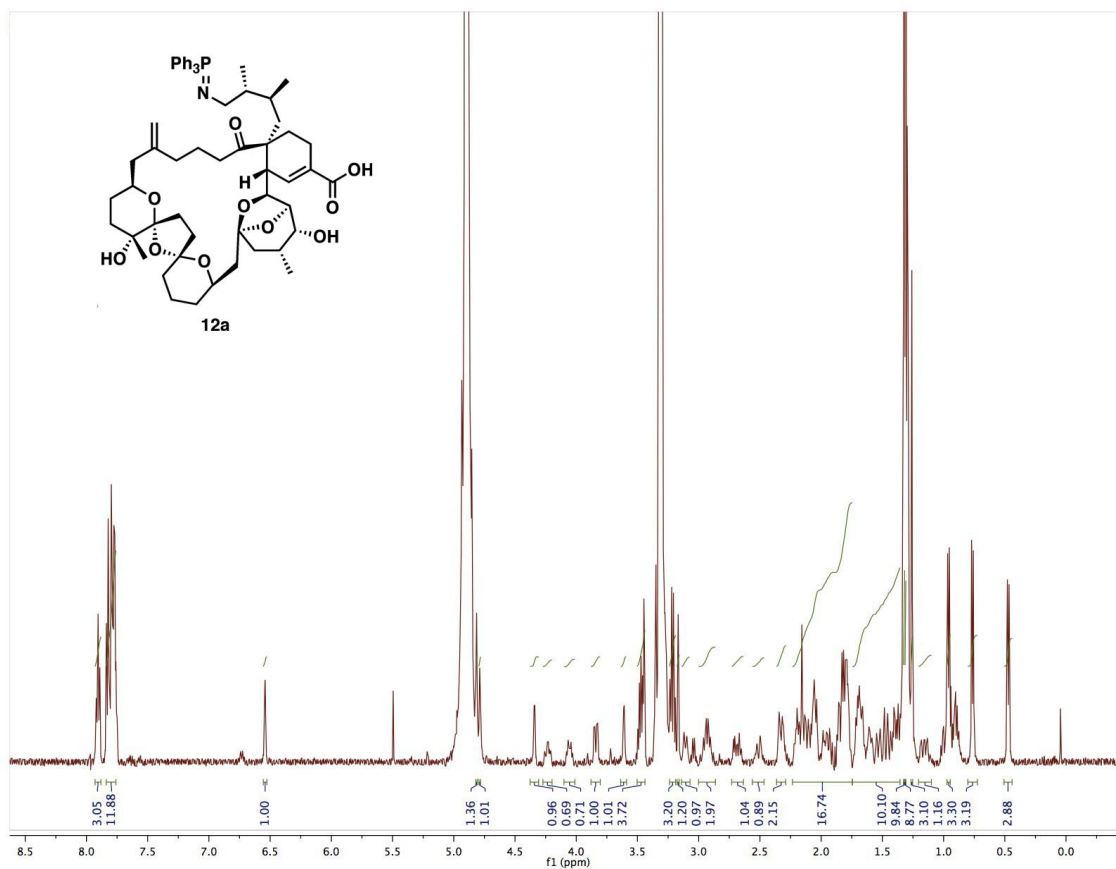

## Computation data

### Molecular Modeling:

Three-dimensional coordinates of pinnatoxin A were taken from the docking complexes with nicotinic acetylcholine receptors described previously.<sup>6</sup> This structure was further edited using GaussView<sup>3</sup> to generate initial coordinates for all other compounds used in this study.

The geometries of the structures **1** and **13** were optimized in gas-phase using Gaussian 09<sup>1,2</sup> with the Becke's three-parameter hybrid exchange functional (B3LYP)<sup>4,5</sup> and the 6-31+G(d,p) basis set. Subsequent vibrational frequency calculations confirmed that these conformations were local minima and maxima, respectively. All the transition states were validated i) by visual inspection, in GaussView5, of the atomic movements corresponding to the imaginary vibrational frequency and ii) by geometry optimization of the structures extracted from the Display Vibrations/Manual Displacement menu of GaussView5 (amplitudes +1 and -1), which led to the corresponding minima.

Images were generated using Chimera.<sup>6</sup>

All calculations were performed using the high-performance computing (HPC) facilities at the Institut de Chimie des Substances Naturelles, Gif sur Yvette, France. These calculations required more than 700 days.cpu on recent computing nodes running with CentOS

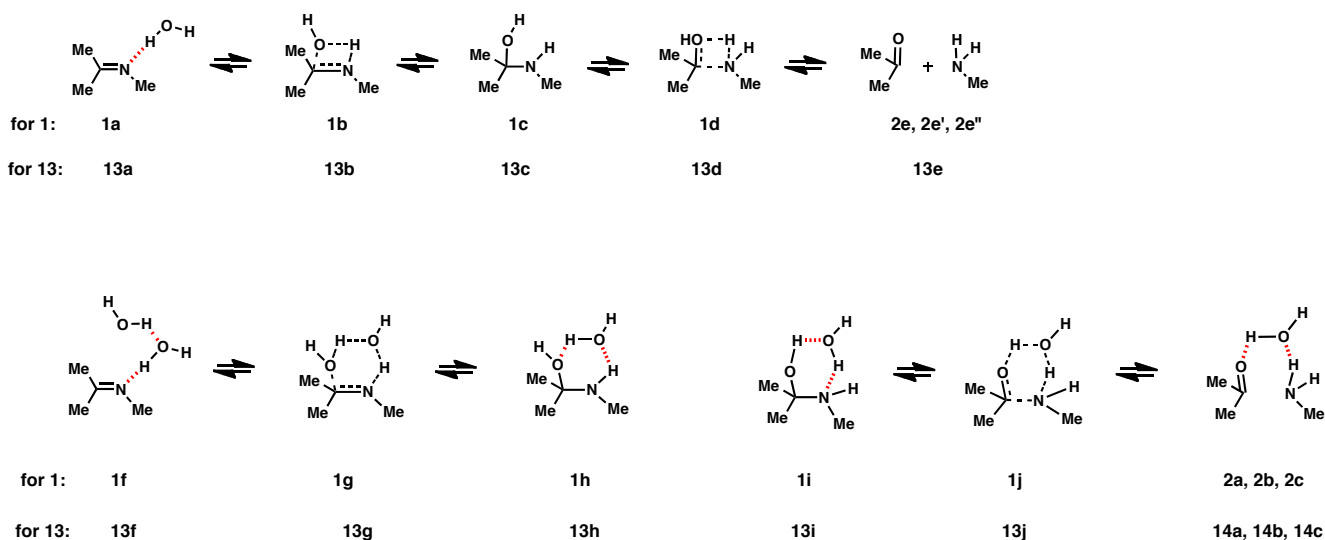

## structure 1a

ENERGY:

Final Energy in Hartrees: HF = -2406.8866892 (B3LYP/6-31+G(D,P))

COORDINATES:

Standard orientation:

| Center<br>Number | Atomic<br>Number | Atomic<br>Type | Coordinates (Angstroms) |           |           |
|------------------|------------------|----------------|-------------------------|-----------|-----------|
|                  |                  |                | X                       | Y         | Z         |
| 1                | 6                | 0              | -1.046652               | 3.808119  | 3.416564  |
| 2                | 6                | 0              | -1.007423               | 2.642198  | 2.755907  |
| 3                | 6                | 0              | -2.282957               | 1.875291  | 2.453360  |
| 4                | 6                | 0              | -2.575240               | 1.649550  | 0.960958  |
| 5                | 1                | 0              | -1.790119               | 1.029450  | 0.510501  |
| 6                | 6                | 0              | -2.727355               | 2.947569  | 0.168780  |
| 7                | 6                | 0              | -3.259401               | 2.660740  | -1.240566 |
| 8                | 6                | 0              | -4.550094               | 1.818477  | -1.219447 |
| 9                | 6                | 0              | -5.745650               | 2.620439  | -0.699897 |
| 10               | 8                | 0              | -4.897657               | 1.428932  | -2.554067 |
| 11               | 8                | 0              | -3.808768               | 0.892748  | 0.926335  |
| 12               | 6                | 0              | -4.303446               | 0.539796  | -0.357332 |
| 13               | 6                | 0              | -5.519265               | -0.365891 | -0.130294 |
| 14               | 6                | 0              | -4.889093               | -1.756859 | -0.024653 |
| 15               | 6                | 0              | -3.700109               | -1.696512 | -0.993763 |
| 16               | 6                | 0              | -4.011331               | -2.207235 | -2.409912 |
| 17               | 6                | 0              | -2.757914               | -2.232350 | -3.292643 |
| 18               | 6                | 0              | -1.648891               | -3.025091 | -2.590810 |
| 19               | 6                | 0              | -1.397436               | -2.472884 | -1.185469 |
| 20               | 1                | 0              | -1.005920               | -1.452122 | -1.260915 |
| 21               | 8                | 0              | -2.635701               | -2.416705 | -0.424216 |
| 22               | 8                | 0              | -3.371436               | -0.275352 | -1.083233 |
| 23               | 6                | 0              | 0.274008                | 1.978546  | 2.291279  |
| 24               | 6                | 0              | 1.598173                | 2.573099  | 2.786589  |
| 25               | 6                | 0              | 2.865585                | 1.875104  | 2.230310  |
| 26               | 6                | 0              | 2.970608                | 1.941568  | 0.697945  |
| 27               | 7                | 0              | 3.070020                | 3.150553  | 0.276481  |
| 28               | 1                | 0              | 3.425876                | 4.592482  | 1.384074  |
| 29               | 6                | 0              | 3.171305                | 3.666090  | -1.088781 |
| 30               | 6                | 0              | 2.580046                | 2.924238  | -2.315871 |
| 31               | 1                | 0              | 3.335159                | 2.261225  | -2.753504 |
| 32               | 6                | 0              | 2.255283                | 3.987727  | -3.380391 |
| 33               | 6                | 0              | 1.383989                | 2.048789  | -1.892674 |
| 34               | 1                | 0              | 0.797646                | 2.631083  | -1.164367 |
| 35               | 6                | 0              | 0.439014                | 1.693611  | -3.054388 |
| 36               | 6                | 0              | 1.830606                | 0.722852  | -1.233259 |
| 37               | 6                | 0              | 3.016863                | 0.685964  | -0.212337 |
| 38               | 6                | 0              | 3.016123                | -0.731353 | 0.505744  |
| 39               | 6                | 0              | 1.799688                | -1.161633 | 1.367260  |
| 40               | 1                | 0              | 1.587819                | -0.386720 | 2.102986  |
| 41               | 6                | 0              | 2.003013                | -2.511990 | 2.101495  |
| 42               | 1                | 0              | 3.046762                | -2.829116 | 2.158895  |
| 43               | 6                | 0              | 1.323345                | -2.587561 | 3.480506  |
| 44               | 1                | 0              | 1.835279                | -1.935138 | 4.199366  |
| 45               | 8                | 0              | 1.475679                | -3.915069 | 3.991627  |
| 46               | 6                | 0              | -0.162692               | -2.160418 | 3.362253  |
| 47               | 1                | 0              | -0.156108               | -1.070241 | 3.237535  |
| 48               | 6                | 0              | -0.959642               | -2.468031 | 4.634478  |
| 49               | 6                | 0              | -0.827382               | -2.756010 | 2.099801  |
| 50               | 6                | 0              | 0.124405                | -2.733119 | 0.890569  |
| 51               | 8                | 0              | 0.583448                | -1.395992 | 0.630309  |
| 52               | 6                | 0              | -0.407587               | -3.336691 | -0.407841 |
| 53               | 8                | 0              | 1.308380                | -3.447227 | 1.261935  |
| 54               | 1                | 0              | 3.825358                | -0.676955 | 1.255902  |
| 55               | 6                | 0              | 3.367561                | -1.827926 | -0.495242 |

|     |   |   |           |           |           |
|-----|---|---|-----------|-----------|-----------|
| 56  | 6 | 0 | 4.073573  | -1.665908 | -1.622730 |
| 57  | 6 | 0 | 4.302788  | -2.845073 | -2.602423 |
| 58  | 8 | 0 | 5.081571  | -2.581778 | -3.560468 |
| 59  | 8 | 0 | 3.687966  | -3.914006 | -2.348995 |
| 60  | 6 | 0 | 4.630389  | -0.321249 | -1.996951 |
| 61  | 6 | 0 | 4.440962  | 0.718261  | -0.886830 |
| 62  | 1 | 0 | -1.992803 | 4.240704  | 3.732059  |
| 63  | 1 | 0 | -0.150304 | 4.367933  | 3.662374  |
| 64  | 1 | 0 | -2.234986 | 0.885462  | 2.927248  |
| 65  | 1 | 0 | -3.141954 | 2.398164  | 2.889736  |
| 66  | 1 | 0 | -3.405270 | 3.620870  | 0.709022  |
| 67  | 1 | 0 | -1.759308 | 3.457703  | 0.112541  |
| 68  | 1 | 0 | -3.457109 | 3.589917  | -1.787322 |
| 69  | 1 | 0 | -2.500092 | 2.109963  | -1.808312 |
| 70  | 1 | 0 | -5.853684 | 3.534516  | -1.292171 |
| 71  | 1 | 0 | -6.668670 | 2.043322  | -0.801321 |
| 72  | 1 | 0 | -5.617651 | 2.892221  | 0.350110  |
| 73  | 1 | 0 | -4.200164 | 0.823553  | -2.848528 |
| 74  | 1 | 0 | -6.069552 | -0.068699 | 0.764488  |
| 75  | 1 | 0 | -6.184792 | -0.297645 | -0.995994 |
| 76  | 1 | 0 | -4.497374 | -1.933939 | 0.980200  |
| 77  | 1 | 0 | -5.577207 | -2.567683 | -0.278111 |
| 78  | 1 | 0 | -4.403460 | -3.227626 | -2.310296 |
| 79  | 1 | 0 | -4.805730 | -1.593154 | -2.848940 |
| 80  | 1 | 0 | -2.992005 | -2.674454 | -4.268057 |
| 81  | 1 | 0 | -2.413034 | -1.207886 | -3.483454 |
| 82  | 1 | 0 | -1.937657 | -4.082950 | -2.515779 |
| 83  | 1 | 0 | -0.713841 | -2.983794 | -3.159893 |
| 84  | 1 | 0 | 0.205739  | 0.922759  | 2.579649  |
| 85  | 1 | 0 | 0.277201  | 1.964481  | 1.192423  |
| 86  | 1 | 0 | 1.656171  | 3.630008  | 2.513198  |
| 87  | 1 | 0 | 1.632615  | 2.529910  | 3.882885  |
| 88  | 1 | 0 | 3.732574  | 2.409386  | 2.635227  |
| 89  | 1 | 0 | 2.937108  | 0.853065  | 2.600078  |
| 90  | 1 | 0 | 2.675973  | 4.645490  | -1.036620 |
| 91  | 1 | 0 | 4.232368  | 3.895727  | -1.269846 |
| 92  | 1 | 0 | 3.125411  | 4.633677  | -3.551838 |
| 93  | 1 | 0 | 1.989799  | 3.536236  | -4.340578 |
| 94  | 1 | 0 | 1.424265  | 4.631749  | -3.064625 |
| 95  | 1 | 0 | 0.983405  | 1.196611  | -3.866480 |
| 96  | 1 | 0 | -0.337340 | 1.000709  | -2.710961 |
| 97  | 1 | 0 | -0.061203 | 2.574834  | -3.468317 |
| 98  | 1 | 0 | 0.954659  | 0.299157  | -0.738474 |
| 99  | 1 | 0 | 2.075258  | 0.014292  | -2.029173 |
| 100 | 1 | 0 | 1.339489  | -4.516348 | 3.242577  |
| 101 | 1 | 0 | -0.514913 | -1.976622 | 5.508210  |
| 102 | 1 | 0 | -1.992529 | -2.113941 | 4.537061  |
| 103 | 1 | 0 | -0.978938 | -3.543495 | 4.833953  |
| 104 | 1 | 0 | -1.109756 | -3.802550 | 2.275870  |
| 105 | 1 | 0 | -1.744116 | -2.213475 | 1.857326  |
| 106 | 1 | 0 | -0.864059 | -4.310248 | -0.194229 |
| 107 | 1 | 0 | 0.467329  | -3.510772 | -1.043658 |
| 108 | 1 | 0 | 2.993196  | -2.829290 | -0.306935 |
| 109 | 1 | 0 | 5.693519  | -0.428471 | -2.240728 |
| 110 | 1 | 0 | 4.171176  | 0.010201  | -2.939529 |
| 111 | 1 | 0 | 4.682795  | 1.713665  | -1.261166 |
| 112 | 1 | 0 | 5.168514  | 0.520894  | -0.087058 |
| 113 | 8 | 0 | 3.656574  | 5.388235  | 1.929037  |
| 114 | 1 | 0 | 4.601995  | 5.522280  | 1.794452  |

**FREQUENCIES:**

(B3LYP/3-21G)

|                | 1       | 2       | 3       |
|----------------|---------|---------|---------|
|                | A       | A       | A       |
| Frequencies -- | 27.4277 | 34.5531 | 39.2512 |
| Red. masses -- | 5.1834  | 5.9720  | 5.5536  |
| Frc consts --  | 0.0023  | 0.0042  | 0.0050  |
| IR Inten --    | 0.0759  | 3.0913  | 1.1980  |

## structure 1b

ENERGY:

Final Energy in Hartrees: HF = -2406.8173199 (B3LYP/6-31+G(D,P))

COORDINATES:

Standard orientation:

| Center<br>Number | Atomic<br>Number | Atomic<br>Type | Coordinates (Angstroms) |           |           |
|------------------|------------------|----------------|-------------------------|-----------|-----------|
|                  |                  |                | X                       | Y         | Z         |
| 1                | 6                | 0              | -1.037420               | 3.369737  | 3.917309  |
| 2                | 6                | 0              | -0.999323               | 2.308132  | 3.099109  |
| 3                | 6                | 0              | -2.274857               | 1.583239  | 2.706536  |
| 4                | 6                | 0              | -2.586821               | 1.555539  | 1.201132  |
| 5                | 1                | 0              | -1.803475               | 1.008923  | 0.660973  |
| 6                | 6                | 0              | -2.763844               | 2.944408  | 0.587648  |
| 7                | 6                | 0              | -3.309065               | 2.835058  | -0.841606 |
| 8                | 6                | 0              | -4.587597               | 1.976925  | -0.919776 |
| 9                | 6                | 0              | -5.789137               | 2.690075  | -0.295151 |
| 10               | 8                | 0              | -4.939432               | 1.756302  | -2.290871 |
| 11               | 8                | 0              | -3.813292               | 0.798362  | 1.085359  |
| 12               | 6                | 0              | -4.316365               | 0.602888  | -0.230251 |
| 13               | 6                | 0              | -5.520014               | -0.338630 | -0.109104 |
| 14               | 6                | 0              | -4.874565               | -1.724280 | -0.181896 |
| 15               | 6                | 0              | -3.687393               | -1.530791 | -1.137717 |
| 16               | 6                | 0              | -3.995138               | -1.870600 | -2.604976 |
| 17               | 6                | 0              | -2.744090               | -1.771661 | -3.485908 |
| 18               | 6                | 0              | -1.624416               | -2.630821 | -2.887357 |
| 19               | 6                | 0              | -1.374143               | -2.251141 | -1.426591 |
| 20               | 1                | 0              | -0.987692               | -1.226827 | -1.377319 |
| 21               | 8                | 0              | -2.610961               | -2.292638 | -0.657574 |
| 22               | 8                | 0              | -3.382755               | -0.100113 | -1.057950 |
| 23               | 6                | 0              | 0.280924                | 1.717980  | 2.541230  |
| 24               | 6                | 0              | 1.608770                | 2.265360  | 3.080614  |
| 25               | 6                | 0              | 2.893292                | 1.641933  | 2.471379  |
| 26               | 6                | 0              | 3.062371                | 1.851867  | 0.976533  |
| 27               | 7                | 0              | 3.026597                | 3.131145  | 0.652564  |
| 28               | 1                | 0              | 3.335967                | 3.706617  | 1.434281  |
| 29               | 6                | 0              | 3.298771                | 3.825224  | -0.615178 |
| 30               | 6                | 0              | 2.569321                | 3.316114  | -1.881371 |
| 31               | 1                | 0              | 3.257923                | 2.697758  | -2.466145 |
| 32               | 6                | 0              | 2.223187                | 4.542124  | -2.744980 |
| 33               | 6                | 0              | 1.357448                | 2.434506  | -1.512288 |
| 34               | 1                | 0              | 0.811181                | 2.957028  | -0.712100 |
| 35               | 6                | 0              | 0.374758                | 2.241817  | -2.681699 |
| 36               | 6                | 0              | 1.756607                | 1.021965  | -1.010516 |
| 37               | 6                | 0              | 3.025568                | 0.778617  | -0.111045 |
| 38               | 6                | 0              | 3.015227                | -0.728459 | 0.391332  |
| 39               | 6                | 0              | 1.830799                | -1.255531 | 1.246920  |
| 40               | 1                | 0              | 1.646738                | -0.579248 | 2.080664  |
| 41               | 6                | 0              | 2.052136                | -2.686264 | 1.800335  |
| 42               | 1                | 0              | 3.098587                | -3.000109 | 1.801904  |
| 43               | 6                | 0              | 1.393004                | -2.945858 | 3.167113  |
| 44               | 1                | 0              | 1.909138                | -2.388417 | 3.959119  |
| 45               | 8                | 0              | 1.563615                | -4.327285 | 3.497635  |
| 46               | 6                | 0              | -0.099409               | -2.524106 | 3.125960  |
| 47               | 1                | 0              | -0.104743               | -1.426742 | 3.142502  |
| 48               | 6                | 0              | -0.871761               | -3.002755 | 4.359984  |
| 49               | 6                | 0              | -0.780136               | -2.959333 | 1.806978  |
| 50               | 6                | 0              | 0.153417                | -2.765742 | 0.599383  |
| 51               | 8                | 0              | 0.593158                | -1.397127 | 0.523260  |
| 52               | 6                | 0              | -0.378720               | -3.199585 | -0.765093 |
| 53               | 8                | 0              | 1.348391                | -3.510963 | 0.860357  |
| 54               | 1                | 0              | 3.874966                | -0.801304 | 1.079046  |
| 55               | 6                | 0              | 3.227283                | -1.667959 | -0.791209 |
| 56               | 6                | 0              | 3.782255                | -1.350400 | -1.968222 |
| 57               | 6                | 0              | 3.775681                | -2.354644 | -3.147090 |
| 58               | 8                | 0              | 4.478963                | -2.009410 | -4.135416 |

|     |   |   |           |           |           |
|-----|---|---|-----------|-----------|-----------|
| 59  | 8 | 0 | 3.055934  | -3.380481 | -3.004498 |
| 60  | 6 | 0 | 4.375234  | 0.011312  | -2.190838 |
| 61  | 6 | 0 | 4.383769  | 0.854345  | -0.912943 |
| 62  | 1 | 0 | -1.981720 | 3.750272  | 4.297976  |
| 63  | 1 | 0 | -0.140773 | 3.888449  | 4.240801  |
| 64  | 1 | 0 | -2.216160 | 0.539367  | 3.042826  |
| 65  | 1 | 0 | -3.130634 | 2.036596  | 3.219836  |
| 66  | 1 | 0 | -3.443668 | 3.532114  | 1.218047  |
| 67  | 1 | 0 | -1.802048 | 3.469858  | 0.589011  |
| 68  | 1 | 0 | -3.526365 | 3.824430  | -1.260520 |
| 69  | 1 | 0 | -2.549409 | 2.375158  | -1.484306 |
| 70  | 1 | 0 | -5.916040 | 3.668854  | -0.768526 |
| 71  | 1 | 0 | -6.705040 | 2.116548  | -0.460099 |
| 72  | 1 | 0 | -5.655146 | 2.831624  | 0.779517  |
| 73  | 1 | 0 | -4.246371 | 1.186981  | -2.659153 |
| 74  | 1 | 0 | -6.066453 | -0.161453 | 0.819289  |
| 75  | 1 | 0 | -6.193359 | -0.170528 | -0.954778 |
| 76  | 1 | 0 | -4.480294 | -2.025375 | 0.791974  |
| 77  | 1 | 0 | -5.555605 | -2.502818 | -0.535938 |
| 78  | 1 | 0 | -4.373496 | -2.900777 | -2.628515 |
| 79  | 1 | 0 | -4.799952 | -1.219378 | -2.965181 |
| 80  | 1 | 0 | -2.975504 | -2.093703 | -4.507836 |
| 81  | 1 | 0 | -2.412777 | -0.727005 | -3.550146 |
| 82  | 1 | 0 | -1.901955 | -3.692922 | -2.940429 |
| 83  | 1 | 0 | -0.689963 | -2.513652 | -3.446392 |
| 84  | 1 | 0 | 0.232952  | 0.635769  | 2.709139  |
| 85  | 1 | 0 | 0.263146  | 1.826601  | 1.448373  |
| 86  | 1 | 0 | 1.638587  | 3.351195  | 2.930863  |
| 87  | 1 | 0 | 1.655177  | 2.109253  | 4.165691  |
| 88  | 1 | 0 | 3.787464  | 2.130516  | 2.887391  |
| 89  | 1 | 0 | 2.975967  | 0.587745  | 2.724425  |
| 90  | 1 | 0 | 2.975568  | 4.854689  | -0.422481 |
| 91  | 1 | 0 | 4.387514  | 3.848079  | -0.741635 |
| 92  | 1 | 0 | 3.107486  | 5.177219  | -2.877290 |
| 93  | 1 | 0 | 1.877795  | 4.253564  | -3.741252 |
| 94  | 1 | 0 | 1.441403  | 5.153346  | -2.275253 |
| 95  | 1 | 0 | 0.887559  | 1.836523  | -3.562073 |
| 96  | 1 | 0 | -0.406588 | 1.526555  | -2.403206 |
| 97  | 1 | 0 | -0.117423 | 3.175629  | -2.971290 |
| 98  | 1 | 0 | 0.891061  | 0.611182  | -0.486385 |
| 99  | 1 | 0 | 1.886840  | 0.377072  | -1.881817 |
| 100 | 1 | 0 | 1.417906  | -4.826032 | 2.678259  |
| 101 | 1 | 0 | -0.417748 | -2.622681 | 5.283081  |
| 102 | 1 | 0 | -1.910051 | -2.652731 | 4.324194  |
| 103 | 1 | 0 | -0.875932 | -4.095099 | 4.419268  |
| 104 | 1 | 0 | -1.049560 | -4.023016 | 1.849028  |
| 105 | 1 | 0 | -1.706096 | -2.400069 | 1.651975  |
| 106 | 1 | 0 | -0.831434 | -4.194073 | -0.674800 |
| 107 | 1 | 0 | 0.494171  | -3.288442 | -1.422713 |
| 108 | 1 | 0 | 2.831158  | -2.673892 | -0.708126 |
| 109 | 1 | 0 | 5.398250  | -0.104255 | -2.567619 |
| 110 | 1 | 0 | 3.842765  | 0.512903  | -3.012599 |
| 111 | 1 | 0 | 4.674803  | 1.879831  | -1.125102 |
| 112 | 1 | 0 | 5.155637  | 0.495830  | -0.226604 |
| 113 | 8 | 0 | 5.309452  | 2.610490  | 1.621354  |
| 114 | 1 | 0 | 6.251326  | 2.417710  | 1.726828  |

**FREQUENCIES:**

(B3LYP/3-21G)

|                | 1          | 2       | 3       |
|----------------|------------|---------|---------|
|                | A          | A       | A       |
| Frequencies -- | -1519.6173 | 24.3908 | 35.9093 |
| Red. masses -- | 1.1547     | 4.9973  | 4.9883  |
| Frc consts --  | 1.5710     | 0.0018  | 0.0038  |
| IR Inten --    | 213.4288   | 0.5175  | 0.4957  |

## structure 1c

ENERGY:

Final Energy in Hartrees: HF = -2406.8694133 (B3LYP/6-31+G(D,P))

COORDINATES:

Standard orientation:

| Center<br>Number | Atomic<br>Number | Atomic<br>Type | Coordinates (Angstroms) |           |           |
|------------------|------------------|----------------|-------------------------|-----------|-----------|
|                  |                  |                | X                       | Y         | Z         |
| 1                | 6                | 0              | -0.617678               | 3.648437  | 3.473558  |
| 2                | 6                | 0              | -0.685324               | 2.407630  | 2.968568  |
| 3                | 6                | 0              | -2.029963               | 1.757271  | 2.688768  |
| 4                | 6                | 0              | -2.434510               | 1.716954  | 1.202599  |
| 5                | 1                | 0              | -1.716324               | 1.115001  | 0.631414  |
| 6                | 6                | 0              | -2.566932               | 3.102445  | 0.568504  |
| 7                | 6                | 0              | -3.215319               | 3.007988  | -0.817610 |
| 8                | 6                | 0              | -4.543198               | 2.228040  | -0.794296 |
| 9                | 6                | 0              | -5.656562               | 3.015890  | -0.100272 |
| 10               | 8                | 0              | -5.001000               | 2.012195  | -2.135145 |
| 11               | 8                | 0              | -3.709009               | 1.031437  | 1.176708  |
| 12               | 6                | 0              | -4.300577               | 0.848728  | -0.105406 |
| 13               | 6                | 0              | -5.543803               | -0.026404 | 0.090969  |
| 14               | 6                | 0              | -4.986650               | -1.447183 | -0.023507 |
| 15               | 6                | 0              | -3.823100               | -1.320715 | -1.021115 |
| 16               | 6                | 0              | -4.183835               | -1.666937 | -2.474718 |
| 17               | 6                | 0              | -2.951514               | -1.636906 | -3.388553 |
| 18               | 6                | 0              | -1.858307               | -2.540720 | -2.807439 |
| 19               | 6                | 0              | -1.553018               | -2.153463 | -1.360139 |
| 20               | 1                | 0              | -1.112420               | -1.150222 | -1.334025 |
| 21               | 8                | 0              | -2.770901               | -2.120601 | -0.555940 |
| 22               | 8                | 0              | -3.455328               | 0.096983  | -0.978229 |
| 23               | 6                | 0              | 0.531048                | 1.549592  | 2.667037  |
| 24               | 6                | 0              | 1.894273                | 2.251805  | 2.718369  |
| 25               | 6                | 0              | 3.166201                | 1.409281  | 2.442526  |
| 26               | 6                | 0              | 3.833995                | 1.421131  | 1.020025  |
| 27               | 7                | 0              | 3.875854                | 2.836464  | 0.670298  |
| 28               | 1                | 0              | 4.371358                | 3.318988  | 1.412068  |
| 29               | 6                | 0              | 4.209665                | 3.442277  | -0.617267 |
| 30               | 6                | 0              | 3.145046                | 3.251685  | -1.740485 |
| 31               | 1                | 0              | 3.539641                | 2.560586  | -2.493053 |
| 32               | 6                | 0              | 2.941107                | 4.602146  | -2.452012 |
| 33               | 6                | 0              | 1.837380                | 2.639895  | -1.187122 |
| 34               | 1                | 0              | 1.564045                | 3.234471  | -0.306405 |
| 35               | 6                | 0              | 0.672560                | 2.737911  | -2.189909 |
| 36               | 6                | 0              | 1.946994                | 1.145801  | -0.752083 |
| 37               | 6                | 0              | 3.251522                | 0.534581  | -0.166174 |
| 38               | 6                | 0              | 3.002795                | -0.988763 | 0.227442  |
| 39               | 6                | 0              | 1.831297                | -1.361801 | 1.184774  |
| 40               | 1                | 0              | 1.763707                | -0.645933 | 2.000150  |
| 41               | 6                | 0              | 1.939436                | -2.791126 | 1.771340  |
| 42               | 1                | 0              | 2.954137                | -3.196857 | 1.756791  |
| 43               | 6                | 0              | 1.300666                | -2.965561 | 3.161740  |
| 44               | 1                | 0              | 1.883550                | -2.438312 | 3.927642  |
| 45               | 8                | 0              | 1.369048                | -4.351226 | 3.516792  |
| 46               | 6                | 0              | -0.153546               | -2.425598 | 3.151000  |
| 47               | 1                | 0              | -0.068890               | -1.332671 | 3.135401  |
| 48               | 6                | 0              | -0.924095               | -2.809178 | 4.418989  |
| 49               | 6                | 0              | -0.907262               | -2.833443 | 1.863185  |
| 50               | 6                | 0              | 0.002301                | -2.731211 | 0.626670  |
| 51               | 8                | 0              | 0.547128                | -1.399981 | 0.531806  |
| 52               | 6                | 0              | -0.593177               | -3.145666 | -0.716410 |
| 53               | 8                | 0              | 1.140354                | -3.572772 | 0.873512  |
| 54               | 1                | 0              | 3.903871                | -1.277704 | 0.792794  |
| 55               | 6                | 0              | 2.862513                | -1.869082 | -1.011889 |
| 56               | 6                | 0              | 3.158766                | -1.542680 | -2.276067 |
| 57               | 6                | 0              | 2.750301                | -2.448012 | -3.458326 |
| 58               | 8                | 0              | 3.359520                | -2.222312 | -4.538088 |

|     |   |   |           |           |           |
|-----|---|---|-----------|-----------|-----------|
| 59  | 8 | 0 | 1.834544  | -3.289100 | -3.228030 |
| 60  | 6 | 0 | 3.892528  | -0.267104 | -2.568783 |
| 61  | 6 | 0 | 4.372083  | 0.386167  | -1.268316 |
| 62  | 1 | 0 | -1.520422 | 4.210933  | 3.698490  |
| 63  | 1 | 0 | 0.325320  | 4.145802  | 3.674670  |
| 64  | 1 | 0 | -2.027112 | 0.722180  | 3.053109  |
| 65  | 1 | 0 | -2.819905 | 2.288346  | 3.232686  |
| 66  | 1 | 0 | -3.164428 | 3.744181  | 1.229702  |
| 67  | 1 | 0 | -1.576948 | 3.564303  | 0.494017  |
| 68  | 1 | 0 | -3.399825 | 4.004233  | -1.236320 |
| 69  | 1 | 0 | -2.531880 | 2.494239  | -1.503431 |
| 70  | 1 | 0 | -5.760732 | 3.994629  | -0.579549 |
| 71  | 1 | 0 | -6.612651 | 2.493525  | -0.192533 |
| 72  | 1 | 0 | -5.440083 | 3.161966  | 0.960279  |
| 73  | 1 | 0 | -4.364342 | 1.404141  | -2.541879 |
| 74  | 1 | 0 | -6.021780 | 0.177336  | 1.051403  |
| 75  | 1 | 0 | -6.256278 | 0.184319  | -0.711893 |
| 76  | 1 | 0 | -4.575045 | -1.786706 | 0.930310  |
| 77  | 1 | 0 | -5.728057 | -2.177093 | -0.359975 |
| 78  | 1 | 0 | -4.606973 | -2.680007 | -2.473035 |
| 79  | 1 | 0 | -4.969611 | -0.986004 | -2.823162 |
| 80  | 1 | 0 | -3.224775 | -1.959840 | -4.400033 |
| 81  | 1 | 0 | -2.574602 | -0.609401 | -3.474974 |
| 82  | 1 | 0 | -2.192789 | -3.587783 | -2.833451 |
| 83  | 1 | 0 | -0.928932 | -2.487980 | -3.384960 |
| 84  | 1 | 0 | 0.520004  | 0.720945  | 3.391803  |
| 85  | 1 | 0 | 0.373616  | 1.070377  | 1.696032  |
| 86  | 1 | 0 | 1.894927  | 3.104406  | 2.032481  |
| 87  | 1 | 0 | 2.007337  | 2.671590  | 3.726347  |
| 88  | 1 | 0 | 3.962082  | 1.832717  | 3.067410  |
| 89  | 1 | 0 | 3.069463  | 0.382956  | 2.799764  |
| 90  | 1 | 0 | 4.270181  | 4.515281  | -0.396088 |
| 91  | 1 | 0 | 5.207481  | 3.165409  | -1.001355 |
| 92  | 1 | 0 | 3.909537  | 5.034180  | -2.734519 |
| 93  | 1 | 0 | 2.350814  | 4.500898  | -3.367157 |
| 94  | 1 | 0 | 2.434049  | 5.322872  | -1.796496 |
| 95  | 1 | 0 | 0.935416  | 2.276974  | -3.150225 |
| 96  | 1 | 0 | -0.201702 | 2.203064  | -1.803915 |
| 97  | 1 | 0 | 0.369166  | 3.772641  | -2.379496 |
| 98  | 1 | 0 | 1.137391  | 0.971313  | -0.040927 |
| 99  | 1 | 0 | 1.680623  | 0.525401  | -1.611470 |
| 100 | 1 | 0 | 1.128975  | -4.846179 | 2.717416  |
| 101 | 1 | 0 | -0.411433 | -2.447963 | 5.319014  |
| 102 | 1 | 0 | -1.929829 | -2.373043 | 4.404377  |
| 103 | 1 | 0 | -1.019364 | -3.895547 | 4.507098  |
| 104 | 1 | 0 | -1.257750 | -3.871844 | 1.933361  |
| 105 | 1 | 0 | -1.791283 | -2.206356 | 1.724289  |
| 106 | 1 | 0 | -1.100556 | -4.110663 | -0.595684 |
| 107 | 1 | 0 | 0.243477  | -3.287620 | -1.413784 |
| 108 | 1 | 0 | 2.383257  | -2.828720 | -0.866048 |
| 109 | 1 | 0 | 4.746623  | -0.498021 | -3.215980 |
| 110 | 1 | 0 | 3.267164  | 0.411213  | -3.166132 |
| 111 | 1 | 0 | 4.870466  | 1.328852  | -1.490770 |
| 112 | 1 | 0 | 5.143261  | -0.285579 | -0.866092 |
| 113 | 8 | 0 | 5.162038  | 0.924829  | 1.374336  |
| 114 | 1 | 0 | 5.668990  | 0.802321  | 0.561639  |

**FREQUENCIES:**

(B3LYP/3-21G)

|                | 1       | 2       | 3       |
|----------------|---------|---------|---------|
|                | A       | A       | A       |
| Frequencies -- | 24.8812 | 33.3830 | 39.7610 |
| Red. masses -- | 4.8740  | 4.9833  | 5.1658  |
| Frc consts --  | 0.0018  | 0.0033  | 0.0048  |
| IR Inten --    | 0.4357  | 1.3669  | 0.5319  |



## structure 1d

ENERGY:

Final Energy in Hartrees: HF = -2406.8159708 (B3LYP/6-31+G(D,P))

COORDINATES:

Standard orientation:

| Center<br>Number | Atomic<br>Number | Atomic<br>Type | Coordinates (Angstroms) |           |           |
|------------------|------------------|----------------|-------------------------|-----------|-----------|
|                  |                  |                | X                       | Y         | Z         |
| 1                | 6                | 0              | -0.520370               | 3.783176  | 3.329063  |
| 2                | 6                | 0              | -0.609383               | 2.514489  | 2.902701  |
| 3                | 6                | 0              | -1.963785               | 1.859846  | 2.690037  |
| 4                | 6                | 0              | -2.414030               | 1.775287  | 1.218954  |
| 5                | 1                | 0              | -1.707831               | 1.163598  | 0.642920  |
| 6                | 6                | 0              | -2.575529               | 3.142516  | 0.552137  |
| 7                | 6                | 0              | -3.260562               | 3.005699  | -0.812107 |
| 8                | 6                | 0              | -4.580740               | 2.217048  | -0.729877 |
| 9                | 6                | 0              | -5.680194               | 3.014523  | -0.024880 |
| 10               | 8                | 0              | -5.074461               | 1.963057  | -2.050794 |
| 11               | 8                | 0              | -3.682524               | 1.081227  | 1.249141  |
| 12               | 6                | 0              | -4.306758               | 0.857519  | -0.012711 |
| 13               | 6                | 0              | -5.536044               | -0.022680 | 0.240589  |
| 14               | 6                | 0              | -4.971667               | -1.441489 | 0.138600  |
| 15               | 6                | 0              | -3.843081               | -1.328268 | -0.899217 |
| 16               | 6                | 0              | -4.253605               | -1.688483 | -2.335749 |
| 17               | 6                | 0              | -3.053711               | -1.657933 | -3.291828 |
| 18               | 6                | 0              | -1.939510               | -2.556878 | -2.744858 |
| 19               | 6                | 0              | -1.586379               | -2.170322 | -1.307935 |
| 20               | 1                | 0              | -1.131326               | -1.173365 | -1.296330 |
| 21               | 8                | 0              | -2.775671               | -2.121131 | -0.461454 |
| 22               | 8                | 0              | -3.475989               | 0.092511  | -0.885484 |
| 23               | 6                | 0              | 0.593715                | 1.628526  | 2.632200  |
| 24               | 6                | 0              | 1.963734                | 2.319500  | 2.565971  |
| 25               | 6                | 0              | 3.200214                | 1.401755  | 2.379397  |
| 26               | 6                | 0              | 3.924675                | 1.190862  | 1.013359  |
| 27               | 7                | 0              | 4.463471                | 2.673788  | 0.536536  |
| 28               | 1                | 0              | 4.578592                | 3.152855  | 1.429328  |
| 29               | 6                | 0              | 4.011262                | 3.704757  | -0.448875 |
| 30               | 6                | 0              | 3.075206                | 3.307433  | -1.604816 |
| 31               | 1                | 0              | 3.597368                | 2.642628  | -2.296950 |
| 32               | 6                | 0              | 2.784178                | 4.611079  | -2.376653 |
| 33               | 6                | 0              | 1.795609                | 2.598055  | -1.091063 |
| 34               | 1                | 0              | 1.488673                | 3.151456  | -0.190548 |
| 35               | 6                | 0              | 0.617117                | 2.695869  | -2.080580 |
| 36               | 6                | 0              | 1.944620                | 1.089840  | -0.723128 |
| 37               | 6                | 0              | 3.267784                | 0.460111  | -0.214819 |
| 38               | 6                | 0              | 3.027964                | -1.076828 | 0.115276  |
| 39               | 6                | 0              | 1.904743                | -1.452737 | 1.121967  |
| 40               | 1                | 0              | 1.886422                | -0.744868 | 1.949873  |
| 41               | 6                | 0              | 2.014788                | -2.887717 | 1.687309  |
| 42               | 1                | 0              | 3.022325                | -3.306416 | 1.629146  |
| 43               | 6                | 0              | 1.426723                | -3.064537 | 3.100146  |
| 44               | 1                | 0              | 2.050027                | -2.556062 | 3.846559  |
| 45               | 8                | 0              | 1.479520                | -4.454726 | 3.439843  |
| 46               | 6                | 0              | -0.016227               | -2.497371 | 3.151378  |
| 47               | 1                | 0              | 0.086278                | -1.405048 | 3.133525  |
| 48               | 6                | 0              | -0.740036               | -2.871333 | 4.449511  |
| 49               | 6                | 0              | -0.827071               | -2.892715 | 1.894586  |
| 50               | 6                | 0              | 0.032956                | -2.786546 | 0.623720  |
| 51               | 8                | 0              | 0.588387                | -1.460755 | 0.530448  |
| 52               | 6                | 0              | -0.618933               | -3.177229 | -0.700234 |
| 53               | 8                | 0              | 1.169981                | -3.645593 | 0.810699  |
| 54               | 1                | 0              | 3.959430                | -1.392064 | 0.610771  |
| 55               | 6                | 0              | 2.804712                | -1.881000 | -1.159142 |
| 56               | 6                | 0              | 3.067030                | -1.487068 | -2.411987 |
| 57               | 6                | 0              | 2.558418                | -2.296015 | -3.625519 |
| 58               | 8                | 0              | 3.088122                | -1.997995 | -4.729210 |

|     |   |   |           |           |           |
|-----|---|---|-----------|-----------|-----------|
| 59  | 8 | 0 | 1.642424  | -3.138506 | -3.393229 |
| 60  | 6 | 0 | 3.832734  | -0.216466 | -2.658665 |
| 61  | 6 | 0 | 4.355704  | 0.376294  | -1.346620 |
| 62  | 1 | 0 | -1.412808 | 4.367145  | 3.539042  |
| 63  | 1 | 0 | 0.430468  | 4.283430  | 3.480839  |
| 64  | 1 | 0 | -1.950290 | 0.836870  | 3.086524  |
| 65  | 1 | 0 | -2.734291 | 2.410197  | 3.242439  |
| 66  | 1 | 0 | -3.160772 | 3.796797  | 1.212041  |
| 67  | 1 | 0 | -1.592407 | 3.610489  | 0.436864  |
| 68  | 1 | 0 | -3.464975 | 3.988645  | -1.252454 |
| 69  | 1 | 0 | -2.592082 | 2.477907  | -1.501935 |
| 70  | 1 | 0 | -5.809717 | 3.977475  | -0.529341 |
| 71  | 1 | 0 | -6.633136 | 2.480575  | -0.071754 |
| 72  | 1 | 0 | -5.432721 | 3.193943  | 1.023723  |
| 73  | 1 | 0 | -4.445384 | 1.348769  | -2.460066 |
| 74  | 1 | 0 | -5.985609 | 0.198395  | 1.210857  |
| 75  | 1 | 0 | -6.274589 | 0.165609  | -0.543998 |
| 76  | 1 | 0 | -4.526433 | -1.757672 | 1.085415  |
| 77  | 1 | 0 | -5.717699 | -2.183856 | -0.157888 |
| 78  | 1 | 0 | -4.669542 | -2.704264 | -2.311546 |
| 79  | 1 | 0 | -5.056163 | -1.015693 | -2.661244 |
| 80  | 1 | 0 | -3.359993 | -1.986092 | -4.292045 |
| 81  | 1 | 0 | -2.683011 | -0.629799 | -3.395820 |
| 82  | 1 | 0 | -2.273819 | -3.604419 | -2.759134 |
| 83  | 1 | 0 | -1.027499 | -2.503548 | -3.350222 |
| 84  | 1 | 0 | 0.619168  | 0.869809  | 3.430201  |
| 85  | 1 | 0 | 0.403126  | 1.058858  | 1.717646  |
| 86  | 1 | 0 | 1.942946  | 3.092765  | 1.789907  |
| 87  | 1 | 0 | 2.108519  | 2.855941  | 3.512166  |
| 88  | 1 | 0 | 4.011902  | 1.800259  | 3.000191  |
| 89  | 1 | 0 | 3.012708  | 0.414770  | 2.809575  |
| 90  | 1 | 0 | 3.503441  | 4.501926  | 0.111740  |
| 91  | 1 | 0 | 4.925896  | 4.143446  | -0.866177 |
| 92  | 1 | 0 | 3.718731  | 5.122424  | -2.637165 |
| 93  | 1 | 0 | 2.250618  | 4.413481  | -3.309063 |
| 94  | 1 | 0 | 2.178441  | 5.307155  | -1.781800 |
| 95  | 1 | 0 | 0.886341  | 2.273288  | -3.055735 |
| 96  | 1 | 0 | -0.231418 | 2.116698  | -1.703014 |
| 97  | 1 | 0 | 0.274985  | 3.724410  | -2.232475 |
| 98  | 1 | 0 | 1.150860  | 0.869540  | -0.007364 |
| 99  | 1 | 0 | 1.662594  | 0.510845  | -1.605388 |
| 100 | 1 | 0 | 1.212143  | -4.937623 | 2.641785  |
| 101 | 1 | 0 | -0.186285 | -2.517978 | 5.328141  |
| 102 | 1 | 0 | -1.739707 | -2.421896 | 4.476060  |
| 103 | 1 | 0 | -0.845849 | -3.956450 | 4.540852  |
| 104 | 1 | 0 | -1.182048 | -3.928901 | 1.974200  |
| 105 | 1 | 0 | -1.711356 | -2.258119 | 1.794858  |
| 106 | 1 | 0 | -1.133530 | -4.137230 | -0.570283 |
| 107 | 1 | 0 | 0.188380  | -3.320381 | -1.430192 |
| 108 | 1 | 0 | 2.297681  | -2.831107 | -1.048941 |
| 109 | 1 | 0 | 4.666997  | -0.440349 | -3.333924 |
| 110 | 1 | 0 | 3.210236  | 0.495837  | -3.221596 |
| 111 | 1 | 0 | 4.828187  | 1.343672  | -1.530174 |
| 112 | 1 | 0 | 5.155343  | -0.262111 | -0.963266 |
| 113 | 8 | 0 | 5.199067  | 0.755438  | 1.253056  |
| 114 | 1 | 0 | 5.410708  | 1.905254  | 0.586931  |

**FREQUENCIES:**

(B3LYP/3-21G)

|                | 1          | 2       | 3       |
|----------------|------------|---------|---------|
|                | A          | A       | A       |
| Frequencies -- | -1340.7609 | 26.0895 | 31.6396 |
| Red. masses -- | 1.1749     | 5.0466  | 4.3458  |
| Frc consts --  | 1.2444     | 0.0020  | 0.0026  |
| IR Inten --    | 380.7681   | 0.9213  | 0.8951  |

## structure 2e

ENERGY:

Final Energy in Hartrees: HF = -2406.8896754 (B3LYP/6-31+G(D,P))

COORDINATES:

Standard orientation:

| Center<br>Number | Atomic<br>Number | Atomic<br>Type | Coordinates (Angstroms) |           |           |
|------------------|------------------|----------------|-------------------------|-----------|-----------|
|                  |                  |                | X                       | Y         | Z         |
| 1                | 6                | 0              | -1.779615               | 2.179140  | 4.541529  |
| 2                | 6                | 0              | -1.547255               | 1.325360  | 3.534350  |
| 3                | 6                | 0              | -2.693463               | 0.609770  | 2.841928  |
| 4                | 6                | 0              | -2.887819               | 0.952726  | 1.355342  |
| 5                | 1                | 0              | -2.001493               | 0.658731  | 0.779097  |
| 6                | 6                | 0              | -3.201569               | 2.427546  | 1.105335  |
| 7                | 6                | 0              | -3.637611               | 2.649697  | -0.348423 |
| 8                | 6                | 0              | -4.780627               | 1.707353  | -0.772204 |
| 9                | 6                | 0              | -6.106027               | 2.085941  | -0.106892 |
| 10               | 8                | 0              | -5.010584               | 1.825888  | -2.182092 |
| 11               | 8                | 0              | -3.991483               | 0.122064  | 0.922482  |
| 12               | 6                | 0              | -4.374897               | 0.236923  | -0.440191 |
| 13               | 6                | 0              | -5.449113               | -0.827399 | -0.693539 |
| 14               | 6                | 0              | -4.626293               | -2.060068 | -1.073840 |
| 15               | 6                | 0              | -3.415523               | -1.479156 | -1.819469 |
| 16               | 6                | 0              | -3.578055               | -1.421477 | -3.346428 |
| 17               | 6                | 0              | -2.293384               | -0.940992 | -4.032098 |
| 18               | 6                | 0              | -1.114059               | -1.812972 | -3.584471 |
| 19               | 6                | 0              | -1.013240               | -1.850061 | -2.056982 |
| 20               | 1                | 0              | -0.758035               | -0.851302 | -1.684156 |
| 21               | 8                | 0              | -2.284202               | -2.235366 | -1.465105 |
| 22               | 8                | 0              | -3.298910               | -0.110491 | -1.323542 |
| 23               | 6                | 0              | -0.159541               | 0.972357  | 3.036102  |
| 24               | 6                | 0              | 1.032336                | 1.487405  | 3.853486  |
| 25               | 6                | 0              | 2.405931                | 1.038820  | 3.300255  |
| 26               | 6                | 0              | 2.708626                | 1.681567  | 1.937041  |
| 27               | 7                | 0              | 1.491508                | 5.464544  | 0.442170  |
| 28               | 1                | 0              | 1.443177                | 6.455432  | 0.659769  |
| 29               | 6                | 0              | 1.942601                | 5.250174  | -0.941459 |
| 30               | 6                | 0              | 2.445001                | 3.811872  | -1.188175 |
| 31               | 1                | 0              | 3.343847                | 3.699111  | -0.574709 |
| 32               | 6                | 0              | 2.864146                | 3.675354  | -2.662576 |
| 33               | 6                | 0              | 1.435276                | 2.730767  | -0.708424 |
| 34               | 1                | 0              | 1.042228                | 3.084714  | 0.248031  |
| 35               | 6                | 0              | 0.228306                | 2.618615  | -1.662653 |
| 36               | 6                | 0              | 2.007588                | 1.302751  | -0.506627 |
| 37               | 6                | 0              | 3.038270                | 0.923426  | 0.627649  |
| 38               | 6                | 0              | 3.135233                | -0.653316 | 0.730851  |
| 39               | 6                | 0              | 1.885336                | -1.472323 | 1.147737  |
| 40               | 1                | 0              | 1.513956                | -1.088909 | 2.098832  |
| 41               | 6                | 0              | 2.160933                | -2.992847 | 1.289238  |
| 42               | 1                | 0              | 3.222550                | -3.245385 | 1.329783  |
| 43               | 6                | 0              | 1.385372                | -3.667293 | 2.434266  |
| 44               | 1                | 0              | 1.778767                | -3.345487 | 3.407233  |
| 45               | 8                | 0              | 1.615451                | -5.077759 | 2.375249  |
| 46               | 6                | 0              | -0.117635               | -3.303424 | 2.338273  |
| 47               | 1                | 0              | -0.201593               | -2.261011 | 2.671331  |
| 48               | 6                | 0              | -0.983943               | -4.151123 | 3.276014  |
| 49               | 6                | 0              | -0.620155               | -3.355125 | 0.877708  |
| 50               | 6                | 0              | 0.418481                | -2.794458 | -0.112014 |
| 51               | 8                | 0              | 0.779784                | -1.445281 | 0.221840  |
| 52               | 6                | 0              | 0.039853                | -2.853888 | -1.590026 |
| 53               | 8                | 0              | 1.630529                | -3.534308 | 0.068436  |
| 54               | 1                | 0              | 3.814756                | -0.841588 | 1.583516  |
| 55               | 6                | 0              | 3.788774                | -1.232845 | -0.517290 |
| 56               | 6                | 0              | 4.651702                | -0.584600 | -1.311895 |
| 57               | 6                | 0              | 5.237830                | -1.261856 | -2.578475 |
| 58               | 8                | 0              | 6.052989                | -0.543690 | -3.221895 |

|     |   |   |           |           |           |
|-----|---|---|-----------|-----------|-----------|
| 59  | 8 | 0 | 4.839839  | -2.429247 | -2.827853 |
| 60  | 6 | 0 | 5.047146  | 0.839714  | -1.033162 |
| 61  | 6 | 0 | 4.511772  | 1.368672  | 0.303127  |
| 62  | 1 | 0 | -2.792663 | 2.393522  | 4.871902  |
| 63  | 1 | 0 | -0.980053 | 2.692240  | 5.065820  |
| 64  | 1 | 0 | -2.537429 | -0.475467 | 2.905325  |
| 65  | 1 | 0 | -3.633300 | 0.829017  | 3.361703  |
| 66  | 1 | 0 | -3.990333 | 2.748398  | 1.798331  |
| 67  | 1 | 0 | -2.317654 | 3.034189  | 1.330525  |
| 68  | 1 | 0 | -3.957643 | 3.685271  | -0.510563 |
| 69  | 1 | 0 | -2.783387 | 2.473084  | -1.011573 |
| 70  | 1 | 0 | -6.331055 | 3.135248  | -0.322040 |
| 71  | 1 | 0 | -6.924502 | 1.479241  | -0.503449 |
| 72  | 1 | 0 | -6.062298 | 1.948720  | 0.975741  |
| 73  | 1 | 0 | -4.209173 | 1.494530  | -2.615015 |
| 74  | 1 | 0 | -6.070966 | -0.975596 | 0.191386  |
| 75  | 1 | 0 | -6.084359 | -0.505714 | -1.523949 |
| 76  | 1 | 0 | -4.259837 | -2.578578 | -0.184208 |
| 77  | 1 | 0 | -5.175730 | -2.776361 | -1.690628 |
| 78  | 1 | 0 | -3.814347 | -2.436721 | -3.690500 |
| 79  | 1 | 0 | -4.434228 | -0.784023 | -3.594573 |
| 80  | 1 | 0 | -2.409708 | -0.978084 | -5.121514 |
| 81  | 1 | 0 | -2.097237 | 0.106005  | -3.768103 |
| 82  | 1 | 0 | -1.245640 | -2.837364 | -3.960506 |
| 83  | 1 | 0 | -0.169560 | -1.436411 | -3.992432 |
| 84  | 1 | 0 | -0.112032 | -0.122378 | 2.970709  |
| 85  | 1 | 0 | -0.061663 | 1.316887  | 1.996781  |
| 86  | 1 | 0 | 1.025039  | 2.581957  | 3.878256  |
| 87  | 1 | 0 | 0.942992  | 1.138367  | 4.889795  |
| 88  | 1 | 0 | 3.183085  | 1.419261  | 3.974823  |
| 89  | 1 | 0 | 2.494416  | -0.047204 | 3.297891  |
| 90  | 1 | 0 | 1.100068  | 5.472682  | -1.611791 |
| 91  | 1 | 0 | 2.760043  | 5.932021  | -1.235159 |
| 92  | 1 | 0 | 3.701264  | 4.345681  | -2.889232 |
| 93  | 1 | 0 | 3.188152  | 2.660475  | -2.906980 |
| 94  | 1 | 0 | 2.042452  | 3.935129  | -3.340557 |
| 95  | 1 | 0 | 0.513895  | 2.197489  | -2.633689 |
| 96  | 1 | 0 | -0.537131 | 1.960750  | -1.237710 |
| 97  | 1 | 0 | -0.235988 | 3.594859  | -1.840769 |
| 98  | 1 | 0 | 1.140595  | 0.658326  | -0.349067 |
| 99  | 1 | 0 | 2.444381  | 0.949442  | -1.445075 |
| 100 | 1 | 0 | 1.603027  | -5.319658 | 1.435852  |
| 101 | 1 | 0 | -0.655667 | -4.049401 | 4.317485  |
| 102 | 1 | 0 | -2.033095 | -3.838309 | 3.219781  |
| 103 | 1 | 0 | -0.923188 | -5.211077 | 3.012437  |
| 104 | 1 | 0 | -0.822539 | -4.393623 | 0.583155  |
| 105 | 1 | 0 | -1.559624 | -2.807859 | 0.776394  |
| 106 | 1 | 0 | -0.296070 | -3.868496 | -1.833714 |
| 107 | 1 | 0 | 0.964008  | -2.666681 | -2.146977 |
| 108 | 1 | 0 | 3.543850  | -2.250950 | -0.805713 |
| 109 | 1 | 0 | 6.140250  | 0.918013  | -1.055355 |
| 110 | 1 | 0 | 4.719994  | 1.467996  | -1.870102 |
| 111 | 1 | 0 | 4.583461  | 2.457357  | 0.346322  |
| 112 | 1 | 0 | 5.148053  | 0.988617  | 1.116403  |
| 113 | 8 | 0 | 2.737443  | 2.908156  | 1.932474  |
| 114 | 1 | 0 | 2.129370  | 5.024985  | 1.102740  |

**FREQUENCIES:**

(B3LYP/3-21G)

|                | 1       | 2       | 3       |
|----------------|---------|---------|---------|
|                | A       | A       | A       |
| Frequencies -- | 27.8590 | 35.3493 | 43.8415 |
| Red. masses -- | 5.2367  | 5.2065  | 5.2020  |
| Frc consts --  | 0.0024  | 0.0038  | 0.0059  |
| IR Inten --    | 0.4412  | 0.3584  | 0.8688  |

## structure 2e'

ENERGY:

Final Energy in Hartrees: HF = -2406.8905871 (B3LYP/6-31+G(D,P))

COORDINATES:

Standard orientation:

| Center<br>Number | Atomic<br>Number | Atomic<br>Type | Coordinates (Angstroms) |           |           |
|------------------|------------------|----------------|-------------------------|-----------|-----------|
|                  |                  |                | X                       | Y         | Z         |
| 1                | 6                | 0              | 1.987107                | -0.115259 | 5.098168  |
| 2                | 6                | 0              | 1.692017                | 0.262056  | 3.846045  |
| 3                | 6                | 0              | 2.790590                | 0.625329  | 2.861192  |
| 4                | 6                | 0              | 2.909021                | -0.295352 | 1.634543  |
| 5                | 1                | 0              | 1.992372                | -0.246518 | 1.033253  |
| 6                | 6                | 0              | 3.215579                | -1.748717 | 1.994226  |
| 7                | 6                | 0              | 3.568837                | -2.552850 | 0.737799  |
| 8                | 6                | 0              | 4.690658                | -1.891898 | -0.086989 |
| 9                | 6                | 0              | 6.047528                | -1.991664 | 0.613944  |
| 10               | 8                | 0              | 4.848469                | -2.582168 | -1.332616 |
| 11               | 8                | 0              | 3.985326                | 0.264346  | 0.844572  |
| 12               | 6                | 0              | 4.300673                | -0.406268 | -0.367806 |
| 13               | 6                | 0              | 5.359656                | 0.440203  | -1.084165 |
| 14               | 6                | 0              | 4.516842                | 1.423128  | -1.899984 |
| 15               | 6                | 0              | 3.275006                | 0.607329  | -2.288466 |
| 16               | 6                | 0              | 3.369512                | -0.076625 | -3.661583 |
| 17               | 6                | 0              | 2.057645                | -0.777905 | -4.034393 |
| 18               | 6                | 0              | 0.893412                | 0.214856  | -3.927444 |
| 19               | 6                | 0              | 0.865609                | 0.871524  | -2.544814 |
| 20               | 1                | 0              | 0.648691                | 0.113537  | -1.783111 |
| 21               | 8                | 0              | 2.158391                | 1.458086  | -2.229576 |
| 22               | 8                | 0              | 3.183671                | -0.433412 | -1.266740 |
| 23               | 6                | 0              | 0.276317                | 0.397856  | 3.321675  |
| 24               | 6                | 0              | -0.874939               | 0.210769  | 4.318828  |
| 25               | 6                | 0              | -2.276371               | 0.375264  | 3.682376  |
| 26               | 6                | 0              | -2.592244               | -0.765907 | 2.698131  |
| 27               | 7                | 0              | -3.104848               | -5.643646 | 0.068436  |
| 28               | 1                | 0              | -2.956458               | -5.411180 | 1.046480  |
| 29               | 6                | 0              | -1.983248               | -5.197159 | -0.768594 |
| 30               | 6                | 0              | -1.903076               | -3.663651 | -0.896717 |
| 31               | 1                | 0              | -2.847801               | -3.341417 | -1.351025 |
| 32               | 6                | 0              | -0.766815               | -3.304260 | -1.869737 |
| 33               | 6                | 0              | -1.804868               | -2.935316 | 0.478291  |
| 34               | 1                | 0              | -2.654010               | -3.280689 | 1.072526  |
| 35               | 6                | 0              | -0.526963               | -3.311325 | 1.251957  |
| 36               | 6                | 0              | -1.936837               | -1.390804 | 0.312271  |
| 37               | 6                | 0              | -2.964053               | -0.599885 | 1.202168  |
| 38               | 6                | 0              | -3.106418               | 0.882360  | 0.676363  |
| 39               | 6                | 0              | -1.861393               | 1.805404  | 0.684199  |
| 40               | 1                | 0              | -1.443002               | 1.829978  | 1.691339  |
| 41               | 6                | 0              | -2.159840               | 3.256857  | 0.225572  |
| 42               | 1                | 0              | -3.223390               | 3.504774  | 0.217975  |
| 43               | 6                | 0              | -1.344694               | 4.331661  | 0.965628  |
| 44               | 1                | 0              | -1.682911               | 4.423673  | 2.005911  |
| 45               | 8                | 0              | -1.607383               | 5.602036  | 0.363265  |
| 46               | 6                | 0              | 0.159556                | 3.959681  | 0.942326  |
| 47               | 1                | 0              | 0.279484                | 3.136109  | 1.657398  |
| 48               | 6                | 0              | 1.051909                | 5.110777  | 1.418507  |
| 49               | 6                | 0              | 0.590474                | 3.422897  | -0.441413 |
| 50               | 6                | 0              | -0.483871               | 2.515155  | -1.069892 |
| 51               | 8                | 0              | -0.800294               | 1.410222  | -0.208506 |
| 52               | 6                | 0              | -0.179976               | 1.981713  | -2.467571 |
| 53               | 8                | 0              | -1.699311               | 3.268804  | -1.134668 |
| 54               | 1                | 0              | -3.767969               | 1.383205  | 1.407946  |
| 55               | 6                | 0              | -3.801745               | 0.912883  | -0.678329 |
| 56               | 6                | 0              | -4.629975               | -0.029461 | -1.149953 |
| 57               | 6                | 0              | -5.252876               | 0.096633  | -2.565694 |
| 58               | 8                | 0              | -6.103675               | -0.793042 | -2.842768 |

|     |   |   |           |           |           |
|-----|---|---|-----------|-----------|-----------|
| 59  | 8 | 0 | -4.844556 | 1.053209  | -3.275411 |
| 60  | 6 | 0 | -4.956782 | -1.254904 | -0.342459 |
| 61  | 6 | 0 | -4.407533 | -1.204099 | 1.089772  |
| 62  | 1 | 0 | 3.018183  | -0.187265 | 5.434500  |
| 63  | 1 | 0 | 1.220949  | -0.363082 | 5.825598  |
| 64  | 1 | 0 | 2.623744  | 1.644343  | 2.487442  |
| 65  | 1 | 0 | 3.759635  | 0.627036  | 3.373384  |
| 66  | 1 | 0 | 4.043466  | -1.773452 | 2.714794  |
| 67  | 1 | 0 | 2.348207  | -2.191767 | 2.495078  |
| 68  | 1 | 0 | 3.875698  | -3.573558 | 0.993298  |
| 69  | 1 | 0 | 2.679608  | -2.636066 | 0.101560  |
| 70  | 1 | 0 | 6.259285  | -3.040105 | 0.846256  |
| 71  | 1 | 0 | 6.844881  | -1.625045 | -0.038000 |
| 72  | 1 | 0 | 6.061757  | -1.414038 | 1.540758  |
| 73  | 1 | 0 | 4.032412  | -2.426419 | -1.832181 |
| 74  | 1 | 0 | 6.024774  | 0.926972  | -0.368315 |
| 75  | 1 | 0 | 5.952453  | -0.206530 | -1.737526 |
| 76  | 1 | 0 | 4.190791  | 2.266647  | -1.286164 |
| 77  | 1 | 0 | 5.035124  | 1.814396  | -2.779549 |
| 78  | 1 | 0 | 3.587516  | 0.703761  | -4.402110 |
| 79  | 1 | 0 | 4.216311  | -0.772404 | -3.660865 |
| 80  | 1 | 0 | 2.123670  | -1.188830 | -5.048526 |
| 81  | 1 | 0 | 1.880446  | -1.624282 | -3.358901 |
| 82  | 1 | 0 | 0.997716  | 0.996002  | -4.693499 |
| 83  | 1 | 0 | -0.065681 | -0.284633 | -4.102643 |
| 84  | 1 | 0 | 0.200877  | 1.392159  | 2.862732  |
| 85  | 1 | 0 | 0.146755  | -0.302857 | 2.485615  |
| 86  | 1 | 0 | -0.828682 | -0.787974 | 4.765571  |
| 87  | 1 | 0 | -0.773581 | 0.935867  | 5.135978  |
| 88  | 1 | 0 | -3.023915 | 0.279207  | 4.479557  |
| 89  | 1 | 0 | -2.399558 | 1.369307  | 3.252622  |
| 90  | 1 | 0 | -1.005968 | -5.586726 | -0.430067 |
| 91  | 1 | 0 | -2.147781 | -5.609024 | -1.771951 |
| 92  | 1 | 0 | -0.955800 | -3.737738 | -2.858870 |
| 93  | 1 | 0 | -0.676011 | -2.222096 | -2.000242 |
| 94  | 1 | 0 | 0.201905  | -3.684190 | -1.522016 |
| 95  | 1 | 0 | 0.372242  | -2.964616 | 0.729422  |
| 96  | 1 | 0 | -0.537884 | -2.861640 | 2.247416  |
| 97  | 1 | 0 | -0.429852 | -4.395195 | 1.388013  |
| 98  | 1 | 0 | -0.952118 | -0.928674 | 0.436739  |
| 99  | 1 | 0 | -2.227268 | -1.159137 | -0.715016 |
| 100 | 1 | 0 | -1.646930 | 5.450096  | -0.594132 |
| 101 | 1 | 0 | 0.777016  | 5.431669  | 2.430583  |
| 102 | 1 | 0 | 2.103766  | 4.802410  | 1.434999  |
| 103 | 1 | 0 | 0.954796  | 5.978349  | 0.759253  |
| 104 | 1 | 0 | 0.759387  | 4.256513  | -1.135876 |
| 105 | 1 | 0 | 1.534530  | 2.879364  | -0.362447 |
| 106 | 1 | 0 | 0.127179  | 2.813868  | -3.111632 |
| 107 | 1 | 0 | -1.126986 | 1.591991  | -2.855723 |
| 108 | 1 | 0 | -3.607356 | 1.752078  | -1.339674 |
| 109 | 1 | 0 | -6.044140 | -1.388727 | -0.323640 |
| 110 | 1 | 0 | -4.590950 | -2.142722 | -0.873021 |
| 111 | 1 | 0 | -4.416278 | -2.199526 | 1.541028  |
| 112 | 1 | 0 | -5.070353 | -0.580288 | 1.707621  |
| 113 | 8 | 0 | -2.575976 | -1.892297 | 3.181763  |
| 114 | 1 | 0 | -3.216963 | -6.651824 | 0.012627  |

**FREQUENCIES:**

(B3LYP/3-21G)

|                | 1       | 2       | 3       |
|----------------|---------|---------|---------|
|                | A       | A       | A       |
| Frequencies -- | 28.6240 | 35.6940 | 40.5620 |
| Red. masses -- | 4.5205  | 4.4983  | 5.2323  |
| Frc consts --  | 0.0022  | 0.0034  | 0.0051  |
| IR Inten --    | 0.4496  | 0.7572  | 0.7551  |

## structure 2e''

ENERGY:

Final Energy in Hartrees: HF = -2406.8982746 (B3LYP/6-31+G(D,P))

COORDINATES:

Standard orientation:

| Center<br>Number | Atomic<br>Number | Atomic<br>Type | Coordinates (Angstroms) |           |           |
|------------------|------------------|----------------|-------------------------|-----------|-----------|
|                  |                  |                | X                       | Y         | Z         |
| 1                | 6                | 0              | 3.062175                | 3.543516  | 3.522679  |
| 2                | 6                | 0              | 2.543857                | 2.973700  | 2.425529  |
| 3                | 6                | 0              | 3.436859                | 2.388613  | 1.347555  |
| 4                | 6                | 0              | 3.370530                | 0.854216  | 1.224427  |
| 5                | 1                | 0              | 2.367859                | 0.539818  | 0.910604  |
| 6                | 6                | 0              | 3.750036                | 0.121388  | 2.510451  |
| 7                | 6                | 0              | 3.911226                | -1.380438 | 2.246585  |
| 8                | 6                | 0              | 4.880550                | -1.671308 | 1.084307  |
| 9                | 6                | 0              | 6.331252                | -1.358703 | 1.457234  |
| 10               | 8                | 0              | 4.857690                | -3.069488 | 0.768714  |
| 11               | 8                | 0              | 4.293684                | 0.522323  | 0.158776  |
| 12               | 6                | 0              | 4.423153                | -0.854704 | -0.165309 |
| 13               | 6                | 0              | 5.334940                | -0.936844 | -1.395914 |
| 14               | 6                | 0              | 4.348415                | -0.804188 | -2.559115 |
| 15               | 6                | 0              | 3.083314                | -1.508145 | -2.047651 |
| 16               | 6                | 0              | 2.985988                | -2.992835 | -2.434336 |
| 17               | 6                | 0              | 1.656581                | -3.608115 | -1.980468 |
| 18               | 6                | 0              | 0.490117                | -2.762572 | -2.504781 |
| 19               | 6                | 0              | 0.658798                | -1.296457 | -2.101307 |
| 20               | 1                | 0              | 0.593896                | -1.207929 | -1.011070 |
| 21               | 8                | 0              | 1.963630                | -0.796362 | -2.510771 |
| 22               | 8                | 0              | 3.178131                | -1.422079 | -0.593767 |
| 23               | 6                | 0              | 1.051757                | 2.884636  | 2.159383  |
| 24               | 6                | 0              | 0.125893                | 2.847045  | 3.388389  |
| 25               | 6                | 0              | -1.296922               | 2.369463  | 3.047120  |
| 26               | 6                | 0              | -1.314337               | 0.918227  | 2.528909  |
| 27               | 7                | 0              | -3.340731               | -2.611617 | -1.461784 |
| 28               | 1                | 0              | -4.095419               | -1.917776 | -1.575366 |
| 29               | 6                | 0              | -3.641940               | -3.488949 | -0.313781 |
| 30               | 6                | 0              | -2.583347               | -3.520218 | 0.829040  |
| 31               | 1                | 0              | -1.589161               | -3.516603 | 0.355184  |
| 32               | 6                | 0              | -2.741633               | -4.861680 | 1.573774  |
| 33               | 6                | 0              | -2.660146               | -2.290649 | 1.794143  |
| 34               | 1                | 0              | -3.726549               | -2.154385 | 2.016023  |
| 35               | 6                | 0              | -1.937193               | -2.545587 | 3.132000  |
| 36               | 6                | 0              | -2.120462               | -1.021135 | 1.082403  |
| 37               | 6                | 0              | -2.472230               | 0.401575  | 1.649347  |
| 38               | 6                | 0              | -2.810581               | 1.406452  | 0.463874  |
| 39               | 6                | 0              | -1.618133               | 1.944720  | -0.356428 |
| 40               | 1                | 0              | -1.078113               | 2.661860  | 0.272651  |
| 41               | 6                | 0              | -2.001478               | 2.619577  | -1.694194 |
| 42               | 1                | 0              | -3.055614               | 2.895397  | -1.760985 |
| 43               | 6                | 0              | -1.097632               | 3.799451  | -2.091182 |
| 44               | 1                | 0              | -1.282537               | 4.660102  | -1.435521 |
| 45               | 8                | 0              | -1.462667               | 4.232057  | -3.405463 |
| 46               | 6                | 0              | 0.389755                | 3.380669  | -1.994141 |
| 47               | 1                | 0              | 0.621937                | 3.321567  | -0.923327 |
| 48               | 6                | 0              | 1.330430                | 4.420409  | -2.612513 |
| 49               | 6                | 0              | 0.609770                | 1.971085  | -2.584700 |
| 50               | 6                | 0              | -0.521943               | 1.002505  | -2.194177 |
| 51               | 8                | 0              | -0.673004               | 0.940955  | -0.767841 |
| 52               | 6                | 0              | -0.411459               | -0.416319 | -2.743276 |
| 53               | 8                | 0              | -1.758891               | 1.572402  | -2.649988 |
| 54               | 1                | 0              | -3.193091               | 2.320530  | 0.947697  |
| 55               | 6                | 0              | -3.946526               | 0.805449  | -0.337104 |
| 56               | 6                | 0              | -4.995200               | 0.224220  | 0.261978  |
| 57               | 6                | 0              | -6.130478               | -0.421399 | -0.549234 |
| 58               | 8                | 0              | -7.262248               | -0.394125 | -0.003352 |

|     |   |   |           |           |           |
|-----|---|---|-----------|-----------|-----------|
| 59  | 8 | 0 | -5.800448 | -0.921976 | -1.665613 |
| 60  | 6 | 0 | -5.089876 | 0.143889  | 1.766526  |
| 61  | 6 | 0 | -3.767989 | 0.441549  | 2.531979  |
| 62  | 1 | 0 | 4.137166  | 3.604786  | 3.672017  |
| 63  | 1 | 0 | 2.437954  | 3.963040  | 4.306235  |
| 64  | 1 | 0 | 3.162408  | 2.806906  | 0.369669  |
| 65  | 1 | 0 | 4.480600  | 2.666355  | 1.534939  |
| 66  | 1 | 0 | 4.680475  | 0.546712  | 2.910136  |
| 67  | 1 | 0 | 2.972300  | 0.289128  | 3.262363  |
| 68  | 1 | 0 | 4.269095  | -1.903513 | 3.140986  |
| 69  | 1 | 0 | 2.932223  | -1.805695 | 1.995140  |
| 70  | 1 | 0 | 6.598247  | -1.908381 | 2.365400  |
| 71  | 1 | 0 | 7.010260  | -1.675715 | 0.660941  |
| 72  | 1 | 0 | 6.475992  | -0.290812 | 1.634513  |
| 73  | 1 | 0 | 3.966374  | -3.255659 | 0.436302  |
| 74  | 1 | 0 | 6.092371  | -0.150925 | -1.375927 |
| 75  | 1 | 0 | 5.833161  | -1.910657 | -1.410065 |
| 76  | 1 | 0 | 4.101930  | 0.243948  | -2.747468 |
| 77  | 1 | 0 | 4.711139  | -1.248086 | -3.490217 |
| 78  | 1 | 0 | 3.058345  | -3.052057 | -3.528205 |
| 79  | 1 | 0 | 3.845765  | -3.531190 | -2.019558 |
| 80  | 1 | 0 | 1.577913  | -4.642093 | -2.337068 |
| 81  | 1 | 0 | 1.617058  | -3.646591 | -0.884298 |
| 82  | 1 | 0 | 0.447414  | -2.829360 | -3.601758 |
| 83  | 1 | 0 | -0.469942 | -3.117601 | -2.115283 |
| 84  | 1 | 0 | 0.773044  | 3.731825  | 1.513002  |
| 85  | 1 | 0 | 0.870294  | 1.989431  | 1.559189  |
| 86  | 1 | 0 | 0.551429  | 2.164917  | 4.130039  |
| 87  | 1 | 0 | 0.064813  | 3.837839  | 3.855243  |
| 88  | 1 | 0 | -1.912480 | 2.385667  | 3.957590  |
| 89  | 1 | 0 | -1.792491 | 3.049190  | 2.346887  |
| 90  | 1 | 0 | -4.614880 | -3.218040 | 0.120570  |
| 91  | 1 | 0 | -3.752153 | -4.522447 | -0.670589 |
| 92  | 1 | 0 | -2.698947 | -5.697740 | 0.865367  |
| 93  | 1 | 0 | -1.958759 | -5.024745 | 2.319299  |
| 94  | 1 | 0 | -3.710572 | -4.919226 | 2.088221  |
| 95  | 1 | 0 | -0.888610 | -2.822829 | 2.965886  |
| 96  | 1 | 0 | -1.921936 | -1.647851 | 3.753785  |
| 97  | 1 | 0 | -2.415746 | -3.342310 | 3.710930  |
| 98  | 1 | 0 | -1.030612 | -1.104670 | 1.049265  |
| 99  | 1 | 0 | -2.456921 | -1.061254 | 0.050335  |
| 100 | 1 | 0 | -1.636498 | 3.428443  | -3.920293 |
| 101 | 1 | 0 | 1.208391  | 5.399264  | -2.132877 |
| 102 | 1 | 0 | 2.376129  | 4.113680  | -2.493325 |
| 103 | 1 | 0 | 1.125629  | 4.547373  | -3.679705 |
| 104 | 1 | 0 | 0.640025  | 2.016833  | -3.681693 |
| 105 | 1 | 0 | 1.568972  | 1.564825  | -2.257323 |
| 106 | 1 | 0 | -0.244570 | -0.370954 | -3.826084 |
| 107 | 1 | 0 | -1.380049 | -0.896306 | -2.563804 |
| 108 | 1 | 0 | -3.886961 | 0.770821  | -1.420559 |
| 109 | 1 | 0 | -5.873097 | 0.831445  | 2.109723  |
| 110 | 1 | 0 | -5.473196 | -0.849096 | 2.026511  |
| 111 | 1 | 0 | -3.663415 | -0.254074 | 3.371075  |
| 112 | 1 | 0 | -3.835561 | 1.442770  | 2.974163  |
| 113 | 8 | 0 | -0.396102 | 0.187778  | 2.874923  |
| 114 | 1 | 0 | -3.361161 | -3.161106 | -2.316088 |

**FREQUENCIES:**

(B3LYP/3-21G)

|                | 1       | 2       | 3       |
|----------------|---------|---------|---------|
|                | A       | A       | A       |
| Frequencies -- | 24.0812 | 38.4166 | 41.9284 |
| Red. masses -- | 5.0389  | 4.8392  | 4.7674  |
| Frc consts --  | 0.0017  | 0.0042  | 0.0049  |
| IR Inten --    | 0.1275  | 0.0473  | 0.7404  |



## structure 13a

ENERGY:

Final Energy in Hartrees: HF = -905.9109804 (B3LYP/6-31+G(D,P))

COORDINATES:

Standard orientation:

| Center<br>Number | Atomic<br>Number | Atomic<br>Type | Coordinates (Angstroms) |           |           |
|------------------|------------------|----------------|-------------------------|-----------|-----------|
|                  |                  |                | X                       | Y         | Z         |
| 1                | 6                | 0              | 1.363119                | -2.451251 | 1.015851  |
| 2                | 6                | 0              | 1.301227                | -1.199164 | 0.158234  |
| 3                | 7                | 0              | 2.394846                | -0.921063 | -0.460047 |
| 4                | 1                | 0              | 3.958317                | -1.870991 | -0.355688 |
| 5                | 6                | 0              | 2.500661                | 0.199999  | -1.394689 |
| 6                | 6                | 0              | 2.555225                | 1.578329  | -0.707214 |
| 7                | 1                | 0              | 2.483938                | 2.321065  | -1.517645 |
| 8                | 6                | 0              | 3.894844                | 1.791954  | 0.016645  |
| 9                | 6                | 0              | 1.340411                | 1.790764  | 0.234778  |
| 10               | 1                | 0              | 1.608003                | 1.375394  | 1.214695  |
| 11               | 6                | 0              | 1.050690                | 3.288975  | 0.430499  |
| 12               | 6                | 0              | 0.078283                | 1.066111  | -0.279866 |
| 13               | 6                | 0              | -0.054615               | -0.465558 | 0.023409  |
| 14               | 6                | 0              | -0.952688               | -0.666877 | 1.298432  |
| 15               | 6                | 0              | -0.472147               | 0.095701  | 2.549430  |
| 16               | 1                | 0              | 0.569681                | -0.129189 | 2.808124  |
| 17               | 1                | 0              | -0.913029               | -1.733324 | 1.556558  |
| 18               | 6                | 0              | -2.408834               | -0.342257 | 1.018928  |
| 19               | 6                | 0              | -2.986930               | -0.294867 | -0.190150 |
| 20               | 6                | 0              | -4.489356               | 0.054859  | -0.353596 |
| 21               | 8                | 0              | -4.898288               | 0.052283  | -1.548753 |
| 22               | 8                | 0              | -5.128574               | 0.301221  | 0.701785  |
| 23               | 6                | 0              | -2.188674               | -0.562845 | -1.439858 |
| 24               | 6                | 0              | -0.807398               | -1.173149 | -1.154318 |
| 25               | 1                | 0              | 1.211830                | -2.227226 | 2.076702  |
| 26               | 1                | 0              | 2.335550                | -2.929819 | 0.889734  |
| 27               | 1                | 0              | 3.423740                | 0.049287  | -1.966811 |
| 28               | 1                | 0              | 1.678082                | 0.180263  | -2.117887 |
| 29               | 1                | 0              | 4.737842                | 1.717744  | -0.680434 |
| 30               | 1                | 0              | 3.942973                | 2.777143  | 0.492998  |
| 31               | 1                | 0              | 4.037637                | 1.035833  | 0.797037  |
| 32               | 1                | 0              | 0.694779                | 3.739429  | -0.504871 |
| 33               | 1                | 0              | 0.273395                | 3.444447  | 1.186531  |
| 34               | 1                | 0              | 1.941765                | 3.841768  | 0.749613  |
| 35               | 1                | 0              | -0.808435               | 1.546656  | 0.143314  |
| 36               | 1                | 0              | -0.002084               | 1.239828  | -1.359790 |
| 37               | 1                | 0              | -3.048820               | -0.140852 | 1.877178  |
| 38               | 1                | 0              | -2.767110               | -1.224500 | -2.093511 |
| 39               | 1                | 0              | -2.095282               | 0.369989  | -2.013562 |
| 40               | 1                | 0              | -0.185509               | -1.144847 | -2.058838 |
| 41               | 1                | 0              | -0.931202               | -2.233112 | -0.895428 |
| 42               | 8                | 0              | 4.837029                | -2.332074 | -0.310356 |
| 43               | 1                | 0              | 5.347179                | -1.831041 | 0.336620  |
| 44               | 1                | 0              | -0.564738               | 1.179212  | 2.423148  |
| 45               | 1                | 0              | -1.097072               | -0.180296 | 3.406055  |
| 46               | 1                | 0              | 0.580409                | -3.161215 | 0.725994  |

FREQUENCIES:

(B3LYP/6-31+G(D,P))

|                | 1       | 2       | 3       |
|----------------|---------|---------|---------|
|                | A       | A       | A       |
| Frequencies -- | 31.0524 | 39.7417 | 45.6927 |
| Red. masses -- | 6.3093  | 11.5724 | 7.2128  |
| Frc consts --  | 0.0036  | 0.0108  | 0.0089  |
| IR Inten --    | 6.0627  | 0.4525  | 11.9175 |

## structure 13b

ENERGY:

Final Energy in Hartrees: HF = -905.8395094 (B3LYP/6-31+G(D,P))

COORDINATES:

Standard orientation:

| Center<br>Number | Atomic<br>Number | Atomic<br>Type | Coordinates (Angstroms) |           |           |
|------------------|------------------|----------------|-------------------------|-----------|-----------|
|                  |                  |                | X                       | Y         | Z         |
| 1                | 6                | 0              | -1.300550               | 2.360277  | 1.585906  |
| 2                | 6                | 0              | -1.358549               | 1.299799  | 0.519860  |
| 3                | 7                | 0              | -2.580372               | 0.977198  | 0.126617  |
| 4                | 1                | 0              | -3.184985               | 1.797416  | 0.193606  |
| 5                | 6                | 0              | -2.901976               | 0.175860  | -1.066595 |
| 6                | 6                | 0              | -2.856928               | -1.334471 | -0.809419 |
| 7                | 1                | 0              | -2.863301               | -1.809034 | -1.802803 |
| 8                | 6                | 0              | -4.102834               | -1.806360 | -0.041812 |
| 9                | 6                | 0              | -1.542327               | -1.740955 | -0.096585 |
| 10               | 1                | 0              | -1.706735               | -1.607039 | 0.978749  |
| 11               | 6                | 0              | -1.218929               | -3.225948 | -0.336098 |
| 12               | 6                | 0              | -0.346869               | -0.865414 | -0.538185 |
| 13               | 6                | 0              | -0.103634               | 0.513169  | 0.161229  |
| 14               | 6                | 0              | 0.802869                | 0.313757  | 1.443894  |
| 15               | 6                | 0              | 0.247795                | -0.664914 | 2.497772  |
| 16               | 1                | 0              | -0.774561               | -0.421107 | 2.812314  |
| 17               | 1                | 0              | 0.867625                | 1.291544  | 1.936968  |
| 18               | 6                | 0              | 2.217544                | -0.085836 | 1.069295  |
| 19               | 6                | 0              | 2.802116                | 0.104455  | -0.122161 |
| 20               | 6                | 0              | 4.254455                | -0.371088 | -0.388342 |
| 21               | 8                | 0              | 4.673481                | -0.140318 | -1.556714 |
| 22               | 8                | 0              | 4.848214                | -0.930297 | 0.570412  |
| 23               | 6                | 0              | 2.049928                | 0.759054  | -1.251103 |
| 24               | 6                | 0              | 0.737582                | 1.423354  | -0.811134 |
| 25               | 1                | 0              | -2.164650               | 3.018316  | 1.500057  |
| 26               | 1                | 0              | -0.406045               | 2.972197  | 1.475050  |
| 27               | 1                | 0              | -3.907499               | 0.479930  | -1.368970 |
| 28               | 1                | 0              | -2.232811               | 0.488573  | -1.870145 |
| 29               | 1                | 0              | -5.019119               | -1.602916 | -0.609219 |
| 30               | 1                | 0              | -4.071568               | -2.881726 | 0.161479  |
| 31               | 1                | 0              | -4.181472               | -1.287159 | 0.920981  |
| 32               | 1                | 0              | -0.964430               | -3.400745 | -1.389181 |
| 33               | 1                | 0              | -0.360304               | -3.542879 | 0.265234  |
| 34               | 1                | 0              | -2.063037               | -3.877627 | -0.083082 |
| 35               | 1                | 0              | 0.575706                | -1.431298 | -0.384442 |
| 36               | 1                | 0              | -0.409022               | -0.716291 | -1.622939 |
| 37               | 1                | 0              | 2.816995                | -0.569242 | 1.839919  |
| 38               | 1                | 0              | 2.699600                | 1.505979  | -1.720729 |
| 39               | 1                | 0              | 1.877639                | 0.018612  | -2.044513 |
| 40               | 1                | 0              | 0.108462                | 1.700263  | -1.660929 |
| 41               | 1                | 0              | 0.960403                | 2.359257  | -0.286879 |
| 42               | 8                | 0              | -2.017977               | 3.083582  | -0.976290 |
| 43               | 1                | 0              | -1.712519               | 3.883636  | -1.427011 |
| 44               | 1                | 0              | 0.259538                | -1.697704 | 2.135852  |
| 45               | 1                | 0              | 0.886725                | -0.632790 | 3.387378  |
| 46               | 1                | 0              | -1.275921               | 1.889281  | 2.578552  |

FREQUENCIES:

(B3LYP/6-31+G(D,P))

|                | 1         | 2       | 3       |
|----------------|-----------|---------|---------|
|                | A         | A       | A       |
| Frequencies -- | -223.6630 | 39.2431 | 47.0723 |
| Red. masses -- | 2.3588    | 11.5582 | 4.8342  |
| Frc consts --  | 0.0695    | 0.0105  | 0.0063  |
| IR Inten --    | 25.9508   | 0.2081  | 9.9373  |

## structure 13c

ENERGY:

Final Energy in Hartrees: HF = -905.8874997 (B3LYP/6-31+G(D,P))

COORDINATES:

Standard orientation:

| Center<br>Number | Atomic<br>Number | Atomic<br>Type | Coordinates (Angstroms) |           |           |
|------------------|------------------|----------------|-------------------------|-----------|-----------|
|                  |                  |                | X                       | Y         | Z         |
| 1                | 6                | 0              | 1.395813                | -2.824776 | 0.924686  |
| 2                | 6                | 0              | 1.488505                | -1.634541 | -0.050431 |
| 3                | 7                | 0              | 2.726350                | -0.910636 | 0.312993  |
| 4                | 1                | 0              | 2.690299                | -0.580060 | 1.270380  |
| 5                | 6                | 0              | 3.249368                | 0.104600  | -0.604464 |
| 6                | 6                | 0              | 2.767137                | 1.557118  | -0.429495 |
| 7                | 1                | 0              | 3.100851                | 2.080725  | -1.340498 |
| 8                | 6                | 0              | 3.462456                | 2.240504  | 0.762161  |
| 9                | 6                | 0              | 1.222438                | 1.711356  | -0.334368 |
| 10               | 1                | 0              | 0.968673                | 1.804335  | 0.723557  |
| 11               | 6                | 0              | 0.790721                | 3.031636  | -1.003395 |
| 12               | 6                | 0              | 0.385479                | 0.551638  | -0.924437 |
| 13               | 6                | 0              | 0.154408                | -0.782647 | -0.145704 |
| 14               | 6                | 0              | -0.543730               | -0.614961 | 1.263374  |
| 15               | 6                | 0              | 0.194744                | 0.067607  | 2.437652  |
| 16               | 1                | 0              | 1.215007                | -0.298435 | 2.597056  |
| 17               | 1                | 0              | -0.700688               | -1.647630 | 1.606224  |
| 18               | 6                | 0              | -1.926721               | 0.002351  | 1.124408  |
| 19               | 6                | 0              | -2.723345               | -0.119167 | 0.053082  |
| 20               | 6                | 0              | -4.126140               | 0.539390  | 0.011740  |
| 21               | 8                | 0              | -4.760844               | 0.354534  | -1.064938 |
| 22               | 8                | 0              | -4.480967               | 1.179790  | 1.036659  |
| 23               | 6                | 0              | -2.257227               | -0.878213 | -1.162647 |
| 24               | 6                | 0              | -0.900268               | -1.589162 | -0.981278 |
| 25               | 1                | 0              | 2.289735                | -3.444321 | 0.796387  |
| 26               | 1                | 0              | 0.514403                | -3.434672 | 0.715666  |
| 27               | 1                | 0              | 4.347388                | 0.097938  | -0.523659 |
| 28               | 1                | 0              | 3.014034                | -0.236069 | -1.615142 |
| 29               | 1                | 0              | 4.552826                | 2.247706  | 0.639407  |
| 30               | 1                | 0              | 3.131779                | 3.279008  | 0.876630  |
| 31               | 1                | 0              | 3.234922                | 1.725829  | 1.704754  |
| 32               | 1                | 0              | 0.919585                | 2.973194  | -2.092499 |
| 33               | 1                | 0              | -0.263501               | 3.248307  | -0.803071 |
| 34               | 1                | 0              | 1.384025                | 3.881558  | -0.643941 |
| 35               | 1                | 0              | -0.608242               | 0.966684  | -1.100827 |
| 36               | 1                | 0              | 0.776168                | 0.293504  | -1.918557 |
| 37               | 1                | 0              | -2.319383               | 0.565913  | 1.969780  |
| 38               | 1                | 0              | -3.024102               | -1.611261 | -1.439535 |
| 39               | 1                | 0              | -2.234483               | -0.190390 | -2.018757 |
| 40               | 1                | 0              | -0.478613               | -1.829848 | -1.960371 |
| 41               | 1                | 0              | -1.072711               | -2.548915 | -0.477517 |
| 42               | 8                | 0              | 1.723514                | -2.166802 | -1.365206 |
| 43               | 1                | 0              | 2.592378                | -2.592461 | -1.322011 |
| 44               | 1                | 0              | 0.233851                | 1.154909  | 2.339696  |
| 45               | 1                | 0              | -0.364372               | -0.140147 | 3.358031  |
| 46               | 1                | 0              | 1.360262                | -2.507506 | 1.970440  |

FREQUENCIES:

(B3LYP/6-31+G(D,P))

|                | 1       | 2       | 3       |
|----------------|---------|---------|---------|
|                | A       | A       | A       |
| Frequencies -- | 22.0696 | 34.9155 | 44.3077 |
| Red. masses -- | 3.3525  | 12.9538 | 4.8840  |
| Frc consts --  | 0.0010  | 0.0093  | 0.0056  |
| IR Inten --    | 1.5735  | 0.7795  | 7.4382  |

## structure 13d

ENERGY:

Final Energy in Hartrees: HF = -905.8261583 (B3LYP/6-31+G(D,P))

COORDINATES:

Standard orientation:

| Center<br>Number | Atomic<br>Number | Atomic<br>Type | Coordinates (Angstroms) |           |           |
|------------------|------------------|----------------|-------------------------|-----------|-----------|
|                  |                  |                | X                       | Y         | Z         |
| 1                | 6                | 0              | 1.417159                | -2.566646 | 1.310257  |
| 2                | 6                | 0              | 1.353180                | -1.696814 | 0.036878  |
| 3                | 7                | 0              | 2.855682                | -1.021433 | 0.008703  |
| 4                | 1                | 0              | 3.323588                | -0.883965 | 0.906322  |
| 5                | 6                | 0              | 3.191490                | 0.006129  | -1.002686 |
| 6                | 6                | 0              | 2.866655                | 1.456571  | -0.643184 |
| 7                | 1                | 0              | 2.933789                | 2.013829  | -1.591137 |
| 8                | 6                | 0              | 3.918134                | 2.043388  | 0.316526  |
| 9                | 6                | 0              | 1.426820                | 1.614600  | -0.095178 |
| 10               | 1                | 0              | 1.484632                | 1.412819  | 0.976409  |
| 11               | 6                | 0              | 0.941867                | 3.067142  | -0.263112 |
| 12               | 6                | 0              | 0.391819                | 0.646961  | -0.731538 |
| 13               | 6                | 0              | 0.091689                | -0.733871 | -0.071395 |
| 14               | 6                | 0              | -0.695123               | -0.568364 | 1.289718  |
| 15               | 6                | 0              | -0.056621               | 0.254361  | 2.433892  |
| 16               | 1                | 0              | 0.997167                | 0.017185  | 2.620624  |
| 17               | 1                | 0              | -0.805687               | -1.586828 | 1.684975  |
| 18               | 6                | 0              | -2.105641               | -0.037029 | 1.072747  |
| 19               | 6                | 0              | -2.808054               | -0.089267 | -0.067977 |
| 20               | 6                | 0              | -4.231126               | 0.518396  | -0.164677 |
| 21               | 8                | 0              | -4.767303               | 0.419245  | -1.304171 |
| 22               | 8                | 0              | -4.695418               | 1.043029  | 0.882442  |
| 23               | 6                | 0              | -2.210156               | -0.719784 | -1.297685 |
| 24               | 6                | 0              | -0.908346               | -1.484557 | -1.013884 |
| 25               | 1                | 0              | 2.329247                | -3.171609 | 1.266608  |
| 26               | 1                | 0              | 0.574928                | -3.262978 | 1.284485  |
| 27               | 1                | 0              | 4.264047                | -0.093610 | -1.218415 |
| 28               | 1                | 0              | 2.658717                | -0.305142 | -1.904073 |
| 29               | 1                | 0              | 4.923433                | 2.001112  | -0.120569 |
| 30               | 1                | 0              | 3.706774                | 3.089175  | 0.559466  |
| 31               | 1                | 0              | 3.942007                | 1.491538  | 1.265629  |
| 32               | 1                | 0              | 0.794748                | 3.301606  | -1.325284 |
| 33               | 1                | 0              | -0.018210               | 3.217925  | 0.240524  |
| 34               | 1                | 0              | 1.652670                | 3.795214  | 0.144741  |
| 35               | 1                | 0              | -0.566555               | 1.170700  | -0.745625 |
| 36               | 1                | 0              | 0.645492                | 0.485945  | -1.787951 |
| 37               | 1                | 0              | -2.595752               | 0.426395  | 1.928317  |
| 38               | 1                | 0              | -2.948703               | -1.394928 | -1.744503 |
| 39               | 1                | 0              | -2.060986               | 0.053734  | -2.064736 |
| 40               | 1                | 0              | -0.390147               | -1.734317 | -1.942440 |
| 41               | 1                | 0              | -1.156450               | -2.443763 | -0.540097 |
| 42               | 8                | 0              | 1.627820                | -2.466932 | -1.060162 |
| 43               | 1                | 0              | 2.856358                | -2.043772 | -0.620089 |
| 44               | 1                | 0              | -0.139644               | 1.330226  | 2.253441  |
| 45               | 1                | 0              | -0.607531               | 0.051161  | 3.360069  |
| 46               | 1                | 0              | 1.389023                | -2.017647 | 2.255298  |

FREQUENCIES:

(B3LYP/6-31+G(D,P))

|                | 1          | 2       | 3       |
|----------------|------------|---------|---------|
|                | A          | A       | A       |
| Frequencies -- | -1532.4721 | 15.8273 | 37.6059 |
| Red. masses -- | 1.1060     | 3.4941  | 11.6085 |
| Frc consts --  | 1.5303     | 0.0005  | 0.0097  |
| IR Inten --    | 754.2165   | 2.4569  | 1.0354  |

## structure 13e

ENERGY:

Final Energy in Hartrees: HF = -905.9031441 (B3LYP/6-31+G(D,P))

COORDINATES:

Standard orientation:

| Center<br>Number | Atomic<br>Number | Atomic<br>Type | Coordinates (Angstroms) |           |           |
|------------------|------------------|----------------|-------------------------|-----------|-----------|
|                  |                  |                | X                       | Y         | Z         |
| 1                | 6                | 0              | -0.434428               | 3.580337  | 0.407040  |
| 2                | 6                | 0              | -0.877742               | 2.206949  | -0.092647 |
| 3                | 7                | 0              | -4.386580               | 0.135405  | -0.074089 |
| 4                | 1                | 0              | -5.228482               | 0.549930  | -0.464704 |
| 5                | 6                | 0              | -3.685146               | -0.637133 | -1.114492 |
| 6                | 6                | 0              | -2.709567               | -1.680909 | -0.527832 |
| 7                | 1                | 0              | -2.276898               | -2.209375 | -1.394197 |
| 8                | 6                | 0              | -3.505009               | -2.711214 | 0.296740  |
| 9                | 6                | 0              | -1.505799               | -1.075478 | 0.263269  |
| 10               | 1                | 0              | -1.924637               | -0.431207 | 1.045925  |
| 11               | 6                | 0              | -0.693713               | -2.207568 | 0.933016  |
| 12               | 6                | 0              | -0.565736               | -0.250585 | -0.663919 |
| 13               | 6                | 0              | 0.136552                | 1.058635  | -0.180353 |
| 14               | 6                | 0              | 0.984268                | 1.011384  | 1.142449  |
| 15               | 6                | 0              | 0.215152                | 0.754418  | 2.453766  |
| 16               | 1                | 0              | -0.660793               | 1.406819  | 2.557053  |
| 17               | 1                | 0              | 1.382203                | 2.031982  | 1.251349  |
| 18               | 6                | 0              | 2.187044                | 0.100102  | 0.989903  |
| 19               | 6                | 0              | 2.802806                | -0.163112 | -0.172351 |
| 20               | 6                | 0              | 4.050096                | -1.082393 | -0.234159 |
| 21               | 8                | 0              | 4.533732                | -1.228372 | -1.391949 |
| 22               | 8                | 0              | 4.441751                | -1.573580 | 0.855964  |
| 23               | 6                | 0              | 2.297055                | 0.410221  | -1.473746 |
| 24               | 6                | 0              | 1.168679                | 1.446616  | -1.303846 |
| 25               | 1                | 0              | -1.145941               | 4.324426  | 0.042328  |
| 26               | 1                | 0              | 0.579362                | 3.848951  | 0.103374  |
| 27               | 1                | 0              | -4.441786               | -1.185672 | -1.691045 |
| 28               | 1                | 0              | -3.156821               | 0.016115  | -1.822916 |
| 29               | 1                | 0              | -4.363826               | -3.076273 | -0.280511 |
| 30               | 1                | 0              | -2.898563               | -3.578913 | 0.568983  |
| 31               | 1                | 0              | -3.898040               | -2.256510 | 1.211629  |
| 32               | 1                | 0              | -0.509853               | -3.016050 | 0.213370  |
| 33               | 1                | 0              | 0.288715                | -1.862389 | 1.260588  |
| 34               | 1                | 0              | -1.210144               | -2.639155 | 1.796777  |
| 35               | 1                | 0              | 0.219380                | -0.931062 | -1.003183 |
| 36               | 1                | 0              | -1.114520               | 0.043902  | -1.563773 |
| 37               | 1                | 0              | 2.608496                | -0.350305 | 1.887728  |
| 38               | 1                | 0              | 3.137862                | 0.867186  | -2.007866 |
| 39               | 1                | 0              | 1.985741                | -0.414924 | -2.127188 |
| 40               | 1                | 0              | 0.637072                | 1.586679  | -2.255048 |
| 41               | 1                | 0              | 1.620158                | 2.412467  | -1.048960 |
| 42               | 8                | 0              | -2.052256               | 2.073143  | -0.420916 |
| 43               | 1                | 0              | -3.791973               | 0.914368  | 0.199613  |
| 44               | 1                | 0              | -0.124344               | -0.276454 | 2.554075  |
| 45               | 1                | 0              | 0.881204                | 0.958423  | 3.300407  |
| 46               | 1                | 0              | -0.460381               | 3.588072  | 1.502992  |

FREQUENCIES:

(B3LYP/6-31+G(D,P))

|                | 1       | 2       | 3       |
|----------------|---------|---------|---------|
|                | A       | A       | A       |
| Frequencies -- | 37.9255 | 40.7428 | 44.5338 |
| Red. masses -- | 7.7908  | 6.0373  | 4.7329  |
| Frc consts --  | 0.0066  | 0.0059  | 0.0055  |
| IR Inten --    | 6.7261  | 1.9629  | 3.4483  |

## structure 1f

ENERGY:

Final Energy in Hartrees: HF = -2483.3348069 (B3LYP/6-31+G(D,P))

COORDINATES:

Standard orientation:

| Center<br>Number | Atomic<br>Number | Atomic<br>Type | Coordinates (Angstroms) |           |           |
|------------------|------------------|----------------|-------------------------|-----------|-----------|
|                  |                  |                | X                       | Y         | Z         |
| 1                | 6                | 0              | -0.150814               | 4.472917  | 2.420083  |
| 2                | 6                | 0              | -0.381894               | 3.202569  | 2.058964  |
| 3                | 6                | 0              | -1.796962               | 2.652298  | 2.016083  |
| 4                | 6                | 0              | -2.276580               | 2.158388  | 0.641300  |
| 5                | 1                | 0              | -1.665214               | 1.311324  | 0.305957  |
| 6                | 6                | 0              | -2.280661               | 3.250448  | -0.428559 |
| 7                | 6                | 0              | -3.009443               | 2.771555  | -1.690300 |
| 8                | 6                | 0              | -4.418537               | 2.225911  | -1.383897 |
| 9                | 6                | 0              | -5.389716               | 3.341691  | -0.991374 |
| 10               | 8                | 0              | -4.974343               | 1.629147  | -2.562553 |
| 11               | 8                | 0              | -3.620432               | 1.670816  | 0.865344  |
| 12               | 6                | 0              | -4.305630               | 1.145994  | -0.263072 |
| 13               | 6                | 0              | -5.627497               | 0.565562  | 0.252703  |
| 14               | 6                | 0              | -5.240959               | -0.864071 | 0.641185  |
| 15               | 6                | 0              | -4.168169               | -1.248338 | -0.387912 |
| 16               | 6                | 0              | -4.711518               | -1.992283 | -1.618572 |
| 17               | 6                | 0              | -3.582974               | -2.440844 | -2.554098 |
| 18               | 6                | 0              | -2.548558               | -3.248743 | -1.761766 |
| 19               | 6                | 0              | -2.060938               | -2.459460 | -0.543791 |
| 20               | 1                | 0              | -1.517823               | -1.568957 | -0.879898 |
| 21               | 8                | 0              | -3.184774               | -2.010977 | 0.264499  |
| 22               | 8                | 0              | -3.613710               | 0.028083  | -0.835731 |
| 23               | 6                | 0              | 0.711650                | 2.208672  | 1.721431  |
| 24               | 6                | 0              | 2.163460                | 2.664915  | 1.906539  |
| 25               | 6                | 0              | 3.229771                | 1.636339  | 1.453228  |
| 26               | 6                | 0              | 3.184265                | 1.334193  | -0.051953 |
| 27               | 7                | 0              | 3.448031                | 2.372256  | -0.764528 |
| 28               | 1                | 0              | 4.185130                | 3.827894  | -0.128629 |
| 29               | 6                | 0              | 3.507099                | 2.523020  | -2.221076 |
| 30               | 6                | 0              | 2.662368                | 1.656990  | -3.190988 |
| 31               | 1                | 0              | 3.235903                | 0.776108  | -3.500932 |
| 32               | 6                | 0              | 2.419292                | 2.493434  | -4.459902 |
| 33               | 6                | 0              | 1.382925                | 1.156788  | -2.491604 |
| 34               | 1                | 0              | 0.994440                | 1.992478  | -1.887967 |
| 35               | 6                | 0              | 0.266086                | 0.748099  | -3.468677 |
| 36               | 6                | 0              | 1.660605                | -0.047614 | -1.563067 |
| 37               | 6                | 0              | 2.921467                | -0.078530 | -0.635105 |
| 38               | 6                | 0              | 2.749434                | -1.274450 | 0.397273  |
| 39               | 6                | 0              | 1.578327                | -1.261280 | 1.415125  |
| 40               | 1                | 0              | 1.588845                | -0.319787 | 1.962957  |
| 41               | 6                | 0              | 1.624357                | -2.436471 | 2.425270  |
| 42               | 1                | 0              | 2.597991                | -2.928262 | 2.482521  |
| 43               | 6                | 0              | 1.096130                | -2.086719 | 3.828426  |
| 44               | 1                | 0              | 1.788486                | -1.408924 | 4.343828  |
| 45               | 8                | 0              | 1.070859                | -3.280866 | 4.615948  |
| 46               | 6                | 0              | -0.297294               | -1.416557 | 3.717906  |
| 47               | 1                | 0              | -0.117419               | -0.399153 | 3.348525  |
| 48               | 6                | 0              | -0.992030               | -1.289195 | 5.078046  |
| 49               | 6                | 0              | -1.188482               | -2.126120 | 2.672764  |
| 50               | 6                | 0              | -0.385519               | -2.544910 | 1.428396  |
| 51               | 8                | 0              | 0.265492                | -1.406894 | 0.837036  |
| 52               | 6                | 0              | -1.151057               | -3.302578 | 0.345346  |
| 53               | 8                | 0              | 0.691960                | -3.377551 | 1.870864  |
| 54               | 1                | 0              | 3.631319                | -1.216066 | 1.059780  |
| 55               | 6                | 0              | 2.794824                | -2.609784 | -0.339771 |
| 56               | 6                | 0              | 3.400895                | -2.840112 | -1.512466 |
| 57               | 6                | 0              | 3.309447                | -4.223642 | -2.205754 |
| 58               | 8                | 0              | 3.995228                | -4.322641 | -3.261003 |

|     |   |   |           |           |           |
|-----|---|---|-----------|-----------|-----------|
| 59  | 8 | 0 | 2.562519  | -5.077462 | -1.660137 |
| 60  | 6 | 0 | 4.147605  | -1.745547 | -2.221558 |
| 61  | 6 | 0 | 4.255921  | -0.471188 | -1.376986 |
| 62  | 1 | 0 | -0.971111 | 5.142464  | 2.666185  |
| 63  | 1 | 0 | 0.850775  | 4.883663  | 2.494698  |
| 64  | 1 | 0 | -1.878629 | 1.805062  | 2.710401  |
| 65  | 1 | 0 | -2.502001 | 3.417332  | 2.361308  |
| 66  | 1 | 0 | -2.761495 | 4.149557  | -0.021737 |
| 67  | 1 | 0 | -1.248449 | 3.529399  | -0.668834 |
| 68  | 1 | 0 | -3.098977 | 3.578462  | -2.426774 |
| 69  | 1 | 0 | -2.427775 | 1.970470  | -2.161813 |
| 70  | 1 | 0 | -5.401914 | 4.103910  | -1.776747 |
| 71  | 1 | 0 | -6.404706 | 2.948481  | -0.889013 |
| 72  | 1 | 0 | -5.099982 | 3.809479  | -0.047988 |
| 73  | 1 | 0 | -4.434612 | 0.845831  | -2.749663 |
| 74  | 1 | 0 | -6.015017 | 1.152928  | 1.087216  |
| 75  | 1 | 0 | -6.362688 | 0.570730  | -0.557401 |
| 76  | 1 | 0 | -4.785603 | -0.891568 | 1.634362  |
| 77  | 1 | 0 | -6.083170 | -1.561013 | 0.626313  |
| 78  | 1 | 0 | -5.251271 | -2.875669 | -1.253685 |
| 79  | 1 | 0 | -5.437915 | -1.354709 | -2.135202 |
| 80  | 1 | 0 | -3.990281 | -3.037080 | -3.378826 |
| 81  | 1 | 0 | -3.099649 | -1.564490 | -3.004762 |
| 82  | 1 | 0 | -2.995837 | -4.193303 | -1.421492 |
| 83  | 1 | 0 | -1.685771 | -3.505520 | -2.385965 |
| 84  | 1 | 0 | 0.523085  | 1.315684  | 2.330149  |
| 85  | 1 | 0 | 0.563858  | 1.871632  | 0.685950  |
| 86  | 1 | 0 | 2.334532  | 3.585607  | 1.342143  |
| 87  | 1 | 0 | 2.347517  | 2.907569  | 2.959793  |
| 88  | 1 | 0 | 4.210153  | 2.073632  | 1.670641  |
| 89  | 1 | 0 | 3.166281  | 0.727600  | 2.050318  |
| 90  | 1 | 0 | 3.209591  | 3.567821  | -2.390620 |
| 91  | 1 | 0 | 4.568377  | 2.482064  | -2.506578 |
| 92  | 1 | 0 | 3.366902  | 2.895645  | -4.839354 |
| 93  | 1 | 0 | 1.973746  | 1.897451  | -5.261234 |
| 94  | 1 | 0 | 1.755932  | 3.344925  | -4.259208 |
| 95  | 1 | 0 | 0.613738  | -0.024833 | -4.164817 |
| 96  | 1 | 0 | -0.583930 | 0.331329  | -2.917004 |
| 97  | 1 | 0 | -0.101942 | 1.595163  | -4.056226 |
| 98  | 1 | 0 | 0.780532  | -0.178373 | -0.930662 |
| 99  | 1 | 0 | 1.700067  | -0.948373 | -2.181395 |
| 100 | 1 | 0 | 0.754613  | -3.989031 | 4.033056  |
| 101 | 1 | 0 | -0.375707 | -0.720433 | 5.784559  |
| 102 | 1 | 0 | -1.951845 | -0.770075 | 4.973134  |
| 103 | 1 | 0 | -1.176328 | -2.273829 | 5.517728  |
| 104 | 1 | 0 | -1.627906 | -3.036610 | 3.101605  |
| 105 | 1 | 0 | -2.018430 | -1.480497 | 2.375835  |
| 106 | 1 | 0 | -1.739202 | -4.101450 | 0.811711  |
| 107 | 1 | 0 | -0.393607 | -3.774549 | -0.289814 |
| 108 | 1 | 0 | 2.267361  | -3.451594 | 0.097791  |
| 109 | 1 | 0 | 5.145749  | -2.107936 | -2.492628 |
| 110 | 1 | 0 | 3.663142  | -1.545889 | -3.188138 |
| 111 | 1 | 0 | 4.632671  | 0.350124  | -1.987053 |
| 112 | 1 | 0 | 5.012379  | -0.624195 | -0.594878 |
| 113 | 8 | 0 | 5.358375  | 4.608100  | 2.941857  |
| 114 | 1 | 0 | 6.305295  | 4.427161  | 2.947726  |
| 115 | 8 | 0 | 4.637029  | 4.644019  | 0.246218  |
| 116 | 1 | 0 | 4.087856  | 5.398610  | 0.003291  |
| 117 | 1 | 0 | 5.103941  | 4.620503  | 1.993485  |

**FREQUENCIES:**

(B3LYP/3-21G)

|                | 1       | 2       | 3       |
|----------------|---------|---------|---------|
|                | A       | A       | A       |
| Frequencies -- | 24.3855 | 38.1508 | 42.2844 |
| Red. masses -- | 5.1367  | 5.5853  | 4.9434  |
| Frc consts --  | 0.0018  | 0.0048  | 0.0052  |
| IR Inten --    | 0.1053  | 1.8426  | 0.8934  |

## structure 1g

ENERGY:

Final Energy in Hartrees: HF = -2483.2882941 (B3LYP/6-31+G(D,P))

COORDINATES:

Standard orientation:

| Center<br>Number | Atomic<br>Number | Atomic<br>Type | Coordinates (Angstroms) |           |           |
|------------------|------------------|----------------|-------------------------|-----------|-----------|
|                  |                  |                | X                       | Y         | Z         |
| 1                | 6                | 0              | 0.309001                | -3.929119 | 3.262461  |
| 2                | 6                | 0              | 0.506716                | -2.738215 | 2.678612  |
| 3                | 6                | 0              | 1.908417                | -2.177272 | 2.512036  |
| 4                | 6                | 0              | 2.381764                | -1.998168 | 1.059393  |
| 5                | 1                | 0              | 1.739162                | -1.278062 | 0.537218  |
| 6                | 6                | 0              | 2.438389                | -3.308536 | 0.273590  |
| 7                | 6                | 0              | 3.150553                | -3.105167 | -1.069304 |
| 8                | 6                | 0              | 4.530234                | -2.436619 | -0.909603 |
| 9                | 6                | 0              | 5.552439                | -3.385991 | -0.280664 |
| 10               | 8                | 0              | 5.056361                | -2.100193 | -2.198894 |
| 11               | 8                | 0              | 3.702549                | -1.419190 | 1.161307  |
| 12               | 6                | 0              | 4.364074                | -1.133143 | -0.066001 |
| 13               | 6                | 0              | 5.659775                | -0.394217 | 0.286999  |
| 14               | 6                | 0              | 5.213859                | 1.068809  | 0.342686  |
| 15               | 6                | 0              | 4.104827                | 1.165859  | -0.717113 |
| 16               | 6                | 0              | 4.582450                | 1.652771  | -2.094335 |
| 17               | 6                | 0              | 3.412334                | 1.847564  | -3.067071 |
| 18               | 6                | 0              | 2.364947                | 2.769377  | -2.432296 |
| 19               | 6                | 0              | 1.936846                | 2.238616  | -1.063650 |
| 20               | 1                | 0              | 1.410947                | 1.285106  | -1.188634 |
| 21               | 8                | 0              | 3.093712                | 1.993551  | -0.208838 |
| 22               | 8                | 0              | 3.622238                | -0.210553 | -0.868963 |
| 23               | 6                | 0              | -0.614391               | -1.846107 | 2.179520  |
| 24               | 6                | 0              | -2.047637               | -2.275236 | 2.512040  |
| 25               | 6                | 0              | -3.207814               | -1.356095 | 2.031496  |
| 26               | 6                | 0              | -3.433046               | -1.308993 | 0.519793  |
| 27               | 7                | 0              | -3.731395               | -2.502464 | 0.047791  |
| 28               | 1                | 0              | -4.173518               | -3.115234 | 0.744926  |
| 29               | 6                | 0              | -3.943797               | -3.017101 | -1.312812 |
| 30               | 6                | 0              | -2.905776               | -2.625490 | -2.395277 |
| 31               | 1                | 0              | -3.320869               | -1.821981 | -3.011534 |
| 32               | 6                | 0              | -2.719046               | -3.845111 | -3.316167 |
| 33               | 6                | 0              | -1.594335               | -2.095625 | -1.771449 |
| 34               | 1                | 0              | -1.320732               | -2.785493 | -0.958138 |
| 35               | 6                | 0              | -0.424333               | -2.085359 | -2.771502 |
| 36               | 6                | 0              | -1.718190               | -0.659553 | -1.194621 |
| 37               | 6                | 0              | -3.017098               | -0.186418 | -0.444847 |
| 38               | 6                | 0              | -2.762781               | 1.236046  | 0.213165  |
| 39               | 6                | 0              | -1.605612               | 1.428106  | 1.233891  |
| 40               | 1                | 0              | -1.611235               | 0.626553  | 1.969932  |
| 41               | 6                | 0              | -1.648839               | 2.789337  | 1.973727  |
| 42               | 1                | 0              | -2.631857               | 3.266439  | 1.958573  |
| 43               | 6                | 0              | -1.072993               | 2.756499  | 3.401580  |
| 44               | 1                | 0              | -1.728996               | 2.187866  | 4.073065  |
| 45               | 8                | 0              | -1.064888               | 4.091470  | 3.916618  |
| 46               | 6                | 0              | 0.338691                | 2.113379  | 3.388939  |
| 47               | 1                | 0              | 0.177037                | 1.037629  | 3.245837  |
| 48               | 6                | 0              | 1.070579                | 2.291822  | 4.723266  |
| 49               | 6                | 0              | 1.183497                | 2.603399  | 2.188895  |
| 50               | 6                | 0              | 0.333355                | 2.715465  | 0.911619  |
| 51               | 8                | 0              | -0.298955               | 1.451277  | 0.629783  |
| 52               | 6                | 0              | 1.025688                | 3.229910  | -0.348076 |
| 53               | 8                | 0              | -0.753086               | 3.604871  | 1.206879  |
| 54               | 1                | 0              | -3.673948               | 1.434176  | 0.801778  |
| 55               | 6                | 0              | -2.597048               | 2.288261  | -0.877048 |
| 56               | 6                | 0              | -2.977825               | 2.183722  | -2.156139 |
| 57               | 6                | 0              | -2.523911               | 3.226674  | -3.203931 |
| 58               | 8                | 0              | -3.149708               | 3.190049  | -4.296722 |



|     |   |   |           |           |           |
|-----|---|---|-----------|-----------|-----------|
| 59  | 8 | 0 | -1.559367 | 3.971505  | -2.867418 |
| 60  | 6 | 0 | -3.806733 | 1.015879  | -2.606682 |
| 61  | 6 | 0 | -4.206775 | 0.115208  | -1.433988 |
| 62  | 1 | 0 | 1.146298  | -4.526675 | 3.613446  |
| 63  | 1 | 0 | -0.680818 | -4.346699 | 3.415132  |
| 64  | 1 | 0 | 1.967250  | -1.192942 | 2.994893  |
| 65  | 1 | 0 | 2.628684  | -2.827791 | 3.021441  |
| 66  | 1 | 0 | 2.958005  | -4.065299 | 0.875810  |
| 67  | 1 | 0 | 1.421300  | -3.682495 | 0.110376  |
| 68  | 1 | 0 | 3.281129  | -4.057009 | -1.597119 |
| 69  | 1 | 0 | 2.534941  | -2.465245 | -1.711528 |
| 70  | 1 | 0 | 5.609412  | -4.302434 | -0.876616 |
| 71  | 1 | 0 | 6.545864  | -2.930027 | -0.270681 |
| 72  | 1 | 0 | 5.277966  | -3.646622 | 0.743921  |
| 73  | 1 | 0 | 4.490635  | -1.392226 | -2.544036 |
| 74  | 1 | 0 | 6.077205  | -0.758056 | 1.227936  |
| 75  | 1 | 0 | 6.390534  | -0.554304 | -0.511131 |
| 76  | 1 | 0 | 4.774760  | 1.309205  | 1.314220  |
| 77  | 1 | 0 | 6.023655  | 1.776278  | 0.144834  |
| 78  | 1 | 0 | 5.088228  | 2.615105  | -1.941627 |
| 79  | 1 | 0 | 5.328286  | 0.951099  | -2.486098 |
| 80  | 1 | 0 | 3.774650  | 2.265900  | -4.013369 |
| 81  | 1 | 0 | 2.956488  | 0.877255  | -3.303507 |
| 82  | 1 | 0 | 2.785089  | 3.777635  | -2.309338 |
| 83  | 1 | 0 | 1.474556  | 2.867778  | -3.062522 |
| 84  | 1 | 0 | -0.425498 | -0.845149 | 2.584060  |
| 85  | 1 | 0 | -0.503860 | -1.728484 | 1.095000  |
| 86  | 1 | 0 | -2.228106 | -3.282102 | 2.117725  |
| 87  | 1 | 0 | -2.148566 | -2.355735 | 3.602013  |
| 88  | 1 | 0 | -4.126027 | -1.774575 | 2.445184  |
| 89  | 1 | 0 | -3.124729 | -0.351901 | 2.439473  |
| 90  | 1 | 0 | -3.911809 | -4.103638 | -1.178947 |
| 91  | 1 | 0 | -4.964829 | -2.775588 | -1.628247 |
| 92  | 1 | 0 | -3.693209 | -4.232108 | -3.638938 |
| 93  | 1 | 0 | -2.155122 | -3.592279 | -4.217920 |
| 94  | 1 | 0 | -2.192691 | -4.658763 | -2.800187 |
| 95  | 1 | 0 | -0.683555 | -1.518072 | -3.673408 |
| 96  | 1 | 0 | 0.449020  | -1.599493 | -2.324626 |
| 97  | 1 | 0 | -0.125992 | -3.093709 | -3.074850 |
| 98  | 1 | 0 | -0.860115 | -0.495472 | -0.538810 |
| 99  | 1 | 0 | -1.575278 | 0.048523  | -2.013005 |
| 100 | 1 | 0 | -0.762345 | 4.661848  | 3.192374  |
| 101 | 1 | 0 | 0.489696  | 1.871726  | 5.553342  |
| 102 | 1 | 0 | 2.042471  | 1.785226  | 4.699806  |
| 103 | 1 | 0 | 1.237590  | 3.351054  | 4.939629  |
| 104 | 1 | 0 | 1.604015  | 3.596624  | 2.395350  |
| 105 | 1 | 0 | 2.025583  | 1.929202  | 2.014582  |
| 106 | 1 | 0 | 1.599014  | 4.130299  | -0.096311 |
| 107 | 1 | 0 | 0.233517  | 3.520572  | -1.051060 |
| 108 | 1 | 0 | -2.023431 | 3.170207  | -0.621464 |
| 109 | 1 | 0 | -4.705980 | 1.394850  | -3.106736 |
| 110 | 1 | 0 | -3.273246 | 0.464724  | -3.395708 |
| 111 | 1 | 0 | -4.679619 | -0.792278 | -1.800596 |
| 112 | 1 | 0 | -4.982276 | 0.590367  | -0.831453 |
| 113 | 8 | 0 | -5.722413 | -0.811699 | 0.960692  |
| 114 | 1 | 0 | -6.061658 | -0.133311 | 1.559154  |
| 115 | 8 | 0 | -5.911275 | -3.209261 | 1.498941  |
| 116 | 1 | 0 | -6.465857 | -3.448862 | 2.248817  |
| 117 | 1 | 0 | -5.971532 | -2.135511 | 1.329890  |

**FREQUENCIES:**

(B3LYP/3-21G)

|                | 1        | 2       | 3       |
|----------------|----------|---------|---------|
|                | A        | A       | A       |
| Frequencies -- | 543.3235 | 27.1937 | 37.3976 |
| Red. masses -- | 1.6459   | 5.2519  | 4.8766  |
| Frc consts --  | 0.2863   | 0.0023  | 0.0040  |
| IR Inten --    | 36.5817  | 0.3841  | 0.2075  |

## structure 1h

ENERGY:

Final Energy in Hartrees: HF = -2483.3135855 (B3LYP/6-31+G(D,P))

COORDINATES:

Standard orientation:

| Center<br>Number | Atomic<br>Number | Atomic<br>Type | Coordinates (Angstroms) |           |           |
|------------------|------------------|----------------|-------------------------|-----------|-----------|
|                  |                  |                | X                       | Y         | Z         |
| 1                | 6                | 0              | -0.154331               | 4.001183  | 2.988209  |
| 2                | 6                | 0              | -0.387446               | 2.726463  | 2.642666  |
| 3                | 6                | 0              | -1.809210               | 2.203894  | 2.523980  |
| 4                | 6                | 0              | -2.321573               | 2.044641  | 1.079882  |
| 5                | 1                | 0              | -1.713799               | 1.306006  | 0.541975  |
| 6                | 6                | 0              | -2.350870               | 3.357533  | 0.296214  |
| 7                | 6                | 0              | -3.103823               | 3.185838  | -1.028129 |
| 8                | 6                | 0              | -4.503656               | 2.573007  | -0.832635 |
| 9                | 6                | 0              | -5.470314               | 3.556279  | -0.169030 |
| 10               | 8                | 0              | -5.080172               | 2.265197  | -2.107833 |
| 11               | 8                | 0              | -3.659811               | 1.510054  | 1.210707  |
| 12               | 6                | 0              | -4.362043               | 1.258795  | -0.001975 |
| 13               | 6                | 0              | -5.674672               | 0.562011  | 0.374264  |
| 14               | 6                | 0              | -5.283540               | -0.917658 | 0.400047  |
| 15               | 6                | 0              | -4.189456               | -1.041048 | -0.673588 |
| 16               | 6                | 0              | -4.692222               | -1.514064 | -2.046855 |
| 17               | 6                | 0              | -3.536118               | -1.733750 | -3.031729 |
| 18               | 6                | 0              | -2.501936               | -2.677993 | -2.408675 |
| 19               | 6                | 0              | -2.049980               | -2.156130 | -1.044618 |
| 20               | 1                | 0              | -1.509904               | -1.211089 | -1.174198 |
| 21               | 8                | 0              | -3.193939               | -1.893455 | -0.176381 |
| 22               | 8                | 0              | -3.673632               | 0.320878  | -0.831644 |
| 23               | 6                | 0              | 0.706611                | 1.707651  | 2.373563  |
| 24               | 6                | 0              | 2.133674                | 2.256076  | 2.248223  |
| 25               | 6                | 0              | 3.297346                | 1.256375  | 2.002179  |
| 26               | 6                | 0              | 3.854139                | 1.032683  | 0.545758  |
| 27               | 7                | 0              | 4.033979                | 2.363150  | 0.035753  |
| 28               | 1                | 0              | 4.589901                | 2.899677  | 0.692927  |
| 29               | 6                | 0              | 4.356559                | 2.763380  | -1.333284 |
| 30               | 6                | 0              | 3.202187                | 2.578777  | -2.366147 |
| 31               | 1                | 0              | 3.463703                | 1.765055  | -3.050996 |
| 32               | 6                | 0              | 3.102984                | 3.855522  | -3.221571 |
| 33               | 6                | 0              | 1.873425                | 2.195456  | -1.673653 |
| 34               | 1                | 0              | 1.728240                | 2.916979  | -0.859924 |
| 35               | 6                | 0              | 0.661835                | 2.314715  | -2.617250 |
| 36               | 6                | 0              | 1.840448                | 0.759720  | -1.062254 |
| 37               | 6                | 0              | 3.108145                | 0.072205  | -0.477447 |
| 38               | 6                | 0              | 2.710511                | -1.349824 | 0.127953  |
| 39               | 6                | 0              | 1.572438                | -1.460894 | 1.191056  |
| 40               | 1                | 0              | 1.641076                | -0.647257 | 1.908974  |
| 41               | 6                | 0              | 1.561086                | -2.811680 | 1.950568  |
| 42               | 1                | 0              | 2.522049                | -3.332958 | 1.936946  |
| 43               | 6                | 0              | 1.000482                | -2.738106 | 3.383191  |
| 44               | 1                | 0              | 1.683485                | -2.185867 | 4.041474  |
| 45               | 8                | 0              | 0.952717                | -4.066535 | 3.915273  |
| 46               | 6                | 0              | -0.386284               | -2.044482 | 3.376059  |
| 47               | 1                | 0              | -0.185942               | -0.978609 | 3.217896  |
| 48               | 6                | 0              | -1.111170               | -2.183050 | 4.718976  |
| 49               | 6                | 0              | -1.260114               | -2.513781 | 2.189392  |
| 50               | 6                | 0              | -0.426962               | -2.665713 | 0.905804  |
| 51               | 8                | 0              | 0.254310                | -1.426037 | 0.616493  |
| 52               | 6                | 0              | -1.148377               | -3.163803 | -0.343029 |
| 53               | 8                | 0              | 0.626859                | -3.597478 | 1.201249  |
| 54               | 1                | 0              | 3.604825                | -1.699042 | 0.681011  |
| 55               | 6                | 0              | 2.389701                | -2.354711 | -0.973050 |
| 56               | 6                | 0              | 2.632607                | -2.223825 | -2.283017 |
| 57               | 6                | 0              | 2.035211                | -3.215791 | -3.305961 |
| 58               | 8                | 0              | 2.600612                | -3.228699 | -4.430686 |

|     |   |   |           |           |           |
|-----|---|---|-----------|-----------|-----------|
| 59  | 8 | 0 | 1.031219  | -3.879937 | -2.916130 |
| 60  | 6 | 0 | 3.483515  | -1.092759 | -2.778903 |
| 61  | 6 | 0 | 4.125314  | -0.341075 | -1.609310 |
| 62  | 1 | 0 | -0.975790 | 4.682164  | 3.195908  |
| 63  | 1 | 0 | 0.846810  | 4.411236  | 3.069452  |
| 64  | 1 | 0 | -1.889021 | 1.222372  | 3.008333  |
| 65  | 1 | 0 | -2.497501 | 2.877911  | 3.047011  |
| 66  | 1 | 0 | -2.827549 | 4.132130  | 0.911452  |
| 67  | 1 | 0 | -1.325755 | 3.692899  | 0.107833  |
| 68  | 1 | 0 | -3.208897 | 4.143930  | -1.550410 |
| 69  | 1 | 0 | -2.530718 | 2.523202  | -1.687124 |
| 70  | 1 | 0 | -5.509563 | 4.478439  | -0.757680 |
| 71  | 1 | 0 | -6.479641 | 3.137700  | -0.132940 |
| 72  | 1 | 0 | -5.156835 | 3.799072  | 0.848714  |
| 73  | 1 | 0 | -4.547205 | 1.543699  | -2.476350 |
| 74  | 1 | 0 | -6.056220 | 0.927360  | 1.329883  |
| 75  | 1 | 0 | -6.417582 | 0.760526  | -0.403832 |
| 76  | 1 | 0 | -4.843804 | -1.191772 | 1.362284  |
| 77  | 1 | 0 | -6.122254 | -1.590037 | 0.199648  |
| 78  | 1 | 0 | -5.218823 | -2.464682 | -1.890574 |
| 79  | 1 | 0 | -5.425629 | -0.793862 | -2.428974 |
| 80  | 1 | 0 | -3.917507 | -2.143473 | -3.974435 |
| 81  | 1 | 0 | -3.062346 | -0.773171 | -3.272569 |
| 82  | 1 | 0 | -2.943461 | -3.676551 | -2.279575 |
| 83  | 1 | 0 | -1.618229 | -2.799691 | -3.044421 |
| 84  | 1 | 0 | 0.666908  | 0.977748  | 3.196812  |
| 85  | 1 | 0 | 0.424470  | 1.138490  | 1.482429  |
| 86  | 1 | 0 | 2.167860  | 3.013008  | 1.459424  |
| 87  | 1 | 0 | 2.367072  | 2.780477  | 3.183527  |
| 88  | 1 | 0 | 4.168888  | 1.674757  | 2.518001  |
| 89  | 1 | 0 | 3.123596  | 0.296634  | 2.495169  |
| 90  | 1 | 0 | 4.562922  | 3.836952  | -1.249715 |
| 91  | 1 | 0 | 5.284305  | 2.310585  | -1.715179 |
| 92  | 1 | 0 | 4.092399  | 4.133144  | -3.605985 |
| 93  | 1 | 0 | 2.443679  | 3.724042  | -4.084442 |
| 94  | 1 | 0 | 2.727452  | 4.701496  | -2.630308 |
| 95  | 1 | 0 | 0.804363  | 1.713174  | -3.523622 |
| 96  | 1 | 0 | -0.241187 | 1.942743  | -2.121225 |
| 97  | 1 | 0 | 0.468893  | 3.348712  | -2.920527 |
| 98  | 1 | 0 | 1.063866  | 0.767005  | -0.294952 |
| 99  | 1 | 0 | 1.452597  | 0.078562  | -1.823437 |
| 100 | 1 | 0 | 0.607104  | -4.631590 | 3.206239  |
| 101 | 1 | 0 | -0.507942 | -1.776432 | 5.539997  |
| 102 | 1 | 0 | -2.064040 | -1.641498 | 4.698913  |
| 103 | 1 | 0 | -1.315101 | -3.233217 | 4.947969  |
| 104 | 1 | 0 | -1.715060 | -3.489464 | 2.406200  |
| 105 | 1 | 0 | -2.078878 | -1.810963 | 2.017251  |
| 106 | 1 | 0 | -1.736543 | -4.051333 | -0.079176 |
| 107 | 1 | 0 | -0.379140 | -3.469207 | -1.066011 |
| 108 | 1 | 0 | 1.814587  | -3.221170 | -0.674302 |
| 109 | 1 | 0 | 4.259037  | -1.506164 | -3.434318 |
| 110 | 1 | 0 | 2.896989  | -0.429803 | -3.431147 |
| 111 | 1 | 0 | 4.702613  | 0.504514  | -1.970835 |
| 112 | 1 | 0 | 4.864748  | -1.014674 | -1.162373 |
| 113 | 8 | 0 | 5.212148  | 0.468430  | 0.789421  |
| 114 | 1 | 0 | 5.153220  | -0.483268 | 0.953999  |
| 115 | 8 | 0 | 6.966732  | 2.441840  | 1.739630  |
| 116 | 1 | 0 | 7.276033  | 2.187385  | 2.616505  |
| 117 | 1 | 0 | 6.469234  | 1.668552  | 1.401105  |

**FREQUENCIES:**

(B3LYP/3-21G)

|                | 1       | 2       | 3       |
|----------------|---------|---------|---------|
|                | A       | A       | A       |
| Frequencies -- | 27.9615 | 34.8347 | 39.6334 |
| Red. masses -- | 5.3012  | 4.6345  | 5.2622  |
| Frc consts --  | 0.0024  | 0.0033  | 0.0049  |
| IR Inten --    | 0.5083  | 0.8279  | 1.6042  |

## structure 1i

ENERGY:

Final Energy in Hartrees: HF = -2483.3060189 (B3LYP/6-31+G(D,P))

COORDINATES:

Standard orientation:

| Center<br>Number | Atomic<br>Number | Atomic<br>Type | Coordinates (Angstroms) |           |           |
|------------------|------------------|----------------|-------------------------|-----------|-----------|
|                  |                  |                | X                       | Y         | Z         |
| 1                | 6                | 0              | -0.534712               | 4.218734  | 2.503745  |
| 2                | 6                | 0              | -0.654287               | 2.904900  | 2.261107  |
| 3                | 6                | 0              | -2.026784               | 2.253154  | 2.207848  |
| 4                | 6                | 0              | -2.560281               | 1.975056  | 0.790986  |
| 5                | 1                | 0              | -1.902410               | 1.265429  | 0.273531  |
| 6                | 6                | 0              | -2.732878               | 3.235036  | -0.057849 |
| 7                | 6                | 0              | -3.476292               | 2.911579  | -1.359693 |
| 8                | 6                | 0              | -4.802684               | 2.166790  | -1.111800 |
| 9                | 6                | 0              | -5.865163               | 3.085745  | -0.504279 |
| 10               | 8                | 0              | -5.346119               | 1.717509  | -2.359095 |
| 11               | 8                | 0              | -3.841646               | 1.333318  | 0.985195  |
| 12               | 6                | 0              | -4.524294               | 0.932059  | -0.197499 |
| 13               | 6                | 0              | -5.759475               | 0.136579  | 0.239253  |
| 14               | 6                | 0              | -5.223992               | -1.291730 | 0.361396  |
| 15               | 6                | 0              | -4.119188               | -1.380011 | -0.704827 |
| 16               | 6                | 0              | -4.556183               | -2.004474 | -2.038354 |
| 17               | 6                | 0              | -3.371059               | -2.168936 | -2.999171 |
| 18               | 6                | 0              | -2.252497               | -2.955250 | -2.305999 |
| 19               | 6                | 0              | -1.870406               | -2.301771 | -0.976379 |
| 20               | 1                | 0              | -1.413029               | -1.323390 | -1.167346 |
| 21               | 8                | 0              | -3.045772               | -2.083462 | -0.141421 |
| 22               | 8                | 0              | -3.748619               | 0.012791  | -0.969521 |
| 23               | 6                | 0              | 0.527960                | 1.971238  | 2.068233  |
| 24               | 6                | 0              | 1.915930                | 2.625423  | 2.033841  |
| 25               | 6                | 0              | 3.151013                | 1.698738  | 1.941421  |
| 26               | 6                | 0              | 3.881829                | 1.250792  | 0.616658  |
| 27               | 7                | 0              | 4.345931                | 2.487911  | -0.083099 |
| 28               | 1                | 0              | 4.228908                | 3.285468  | 0.533455  |
| 29               | 6                | 0              | 4.037493                | 2.867529  | -1.473913 |
| 30               | 6                | 0              | 2.587847                | 3.195018  | -1.868157 |
| 31               | 1                | 0              | 2.575440                | 3.147208  | -2.968771 |
| 32               | 6                | 0              | 2.208922                | 4.633823  | -1.472313 |
| 33               | 6                | 0              | 1.571045                | 2.152936  | -1.345115 |
| 34               | 1                | 0              | 1.268256                | 2.473803  | -0.347903 |
| 35               | 6                | 0              | 0.304397                | 2.169867  | -2.224068 |
| 36               | 6                | 0              | 2.060772                | 0.684874  | -1.277673 |
| 37               | 6                | 0              | 3.272135                | 0.181625  | -0.398862 |
| 38               | 6                | 0              | 2.884080                | -1.191572 | 0.304930  |
| 39               | 6                | 0              | 1.698128                | -1.259578 | 1.309814  |
| 40               | 1                | 0              | 1.708100                | -0.394256 | 1.969589  |
| 41               | 6                | 0              | 1.700091                | -2.552910 | 2.162870  |
| 42               | 1                | 0              | 2.678011                | -3.036664 | 2.219619  |
| 43               | 6                | 0              | 1.078831                | -2.405596 | 3.564364  |
| 44               | 1                | 0              | 1.718540                | -1.791904 | 4.211228  |
| 45               | 8                | 0              | 1.043339                | -3.698590 | 4.178627  |
| 46               | 6                | 0              | -0.325944               | -1.759657 | 3.458204  |
| 47               | 1                | 0              | -0.152629               | -0.700166 | 3.235906  |
| 48               | 6                | 0              | -1.099154               | -1.832027 | 4.779463  |
| 49               | 6                | 0              | -1.137855               | -2.337990 | 2.275495  |
| 50               | 6                | 0              | -0.249571               | -2.554478 | 1.038205  |
| 51               | 8                | 0              | 0.397770                | -1.314492 | 0.682294  |
| 52               | 6                | 0              | -0.901391               | -3.178954 | -0.193708 |
| 53               | 8                | 0              | 0.821579                | -3.422411 | 1.435548  |
| 54               | 1                | 0              | 3.757698                | -1.431439 | 0.928985  |
| 55               | 6                | 0              | 2.665141                | -2.276601 | -0.743011 |
| 56               | 6                | 0              | 3.098223                | -2.274077 | -2.009711 |
| 57               | 6                | 0              | 2.609225                | -3.336642 | -3.018920 |
| 58               | 8                | 0              | 3.275906                | -3.403128 | -4.086654 |

|     |   |   |           |           |           |
|-----|---|---|-----------|-----------|-----------|
| 59  | 8 | 0 | 1.584249  | -3.997277 | -2.684171 |
| 60  | 6 | 0 | 4.052951  | -1.214000 | -2.476825 |
| 61  | 6 | 0 | 4.471265  | -0.303410 | -1.315935 |
| 62  | 1 | 0 | -1.412236 | 4.838651  | 2.668529  |
| 63  | 1 | 0 | 0.425257  | 4.722396  | 2.547246  |
| 64  | 1 | 0 | -2.007166 | 1.295314  | 2.742184  |
| 65  | 1 | 0 | -2.758077 | 2.891418  | 2.717350  |
| 66  | 1 | 0 | -3.282927 | 3.986058  | 0.524650  |
| 67  | 1 | 0 | -1.751116 | 3.665452  | -0.278634 |
| 68  | 1 | 0 | -3.687355 | 3.822550  | -1.932077 |
| 69  | 1 | 0 | -2.841642 | 2.277748  | -1.989802 |
| 70  | 1 | 0 | -5.992906 | 3.964431  | -1.144483 |
| 71  | 1 | 0 | -6.828306 | 2.572304  | -0.442567 |
| 72  | 1 | 0 | -5.580668 | 3.415591  | 0.497421  |
| 73  | 1 | 0 | -4.747383 | 1.025115  | -2.679447 |
| 74  | 1 | 0 | -6.170923 | 0.527965  | 1.171821  |
| 75  | 1 | 0 | -6.521317 | 0.207298  | -0.542581 |
| 76  | 1 | 0 | -4.760016 | -1.455452 | 1.337094  |
| 77  | 1 | 0 | -5.991657 | -2.055732 | 0.210916  |
| 78  | 1 | 0 | -4.980483 | -2.991844 | -1.814353 |
| 79  | 1 | 0 | -5.357096 | -1.396322 | -2.475299 |
| 80  | 1 | 0 | -3.694354 | -2.681590 | -3.912656 |
| 81  | 1 | 0 | -2.997775 | -1.182638 | -3.304111 |
| 82  | 1 | 0 | -2.590614 | -3.983083 | -2.112338 |
| 83  | 1 | 0 | -1.355170 | -3.027366 | -2.929973 |
| 84  | 1 | 0 | 0.502758  | 1.258611  | 2.905360  |
| 85  | 1 | 0 | 0.351872  | 1.353651  | 1.180054  |
| 86  | 1 | 0 | 1.951998  | 3.390412  | 1.251665  |
| 87  | 1 | 0 | 2.032590  | 3.176196  | 2.976288  |
| 88  | 1 | 0 | 3.964615  | 2.231446  | 2.447722  |
| 89  | 1 | 0 | 3.005707  | 0.810169  | 2.558339  |
| 90  | 1 | 0 | 4.664092  | 3.745621  | -1.684115 |
| 91  | 1 | 0 | 4.397600  | 2.081789  | -2.134277 |
| 92  | 1 | 0 | 2.859344  | 5.360825  | -1.973754 |
| 93  | 1 | 0 | 1.176007  | 4.875117  | -1.741983 |
| 94  | 1 | 0 | 2.306387  | 4.793704  | -0.391660 |
| 95  | 1 | 0 | 0.534956  | 1.811419  | -3.234733 |
| 96  | 1 | 0 | -0.468429 | 1.512661  | -1.813797 |
| 97  | 1 | 0 | -0.123306 | 3.174193  | -2.314191 |
| 98  | 1 | 0 | 1.187757  | 0.099515  | -0.983763 |
| 99  | 1 | 0 | 2.250695  | 0.380436  | -2.310564 |
| 100 | 1 | 0 | 0.759911  | -4.318895 | 3.488403  |
| 101 | 1 | 0 | -0.540808 | -1.352030 | 5.592545  |
| 102 | 1 | 0 | -2.067050 | -1.325211 | 4.688187  |
| 103 | 1 | 0 | -1.278636 | -2.871110 | 5.070984  |
| 104 | 1 | 0 | -1.574528 | -3.308425 | 2.546049  |
| 105 | 1 | 0 | -1.968904 | -1.674925 | 2.023790  |
| 106 | 1 | 0 | -1.420552 | -4.094143 | 0.115746  |
| 107 | 1 | 0 | -0.092346 | -3.469211 | -0.877093 |
| 108 | 1 | 0 | 2.023130  | -3.100694 | -0.463268 |
| 109 | 1 | 0 | 4.937247  | -1.702613 | -2.903923 |
| 110 | 1 | 0 | 3.623715  | -0.654698 | -3.320455 |
| 111 | 1 | 0 | 5.066367  | 0.527776  | -1.699842 |
| 112 | 1 | 0 | 5.147894  | -0.875467 | -0.674835 |
| 113 | 8 | 0 | 5.040902  | 0.636673  | 1.232578  |
| 114 | 1 | 0 | 5.823828  | 0.789520  | 0.681243  |
| 115 | 8 | 0 | 7.187398  | 2.176537  | -0.252549 |
| 116 | 1 | 0 | 7.380253  | 1.913769  | -1.160836 |
| 117 | 1 | 0 | 6.230342  | 2.422124  | -0.238096 |

**FREQUENCIES:**

(B3LYP/3-21G)

|                | 1       | 2       | 3       |
|----------------|---------|---------|---------|
|                | A       | A       | A       |
| Frequencies -- | 25.0802 | 37.9747 | 44.5025 |
| Red. masses -- | 5.1694  | 5.2480  | 5.1048  |
| Frc consts --  | 0.0019  | 0.0045  | 0.0060  |
| IR Inten --    | 0.7462  | 0.6259  | 0.8995  |

## structure 1j

ENERGY:

Final Energy in Hartrees: HF = -2483.2903575 (B3LYP/6-31+G(D,P))

COORDINATES:

Standard orientation:

| Center<br>Number | Atomic<br>Number | Atomic<br>Type | Coordinates (Angstroms) |           |           |
|------------------|------------------|----------------|-------------------------|-----------|-----------|
|                  |                  |                | X                       | Y         | Z         |
| 1                | 6                | 0              | -0.234103               | 3.861731  | 3.159606  |
| 2                | 6                | 0              | -0.444981               | 2.595992  | 2.768693  |
| 3                | 6                | 0              | -1.858740               | 2.066618  | 2.604002  |
| 4                | 6                | 0              | -2.352305               | 1.979221  | 1.147054  |
| 5                | 1                | 0              | -1.738447               | 1.266147  | 0.581636  |
| 6                | 6                | 0              | -2.372326               | 3.328447  | 0.425624  |
| 7                | 6                | 0              | -3.111445               | 3.220419  | -0.913445 |
| 8                | 6                | 0              | -4.513521               | 2.599825  | -0.762199 |
| 9                | 6                | 0              | -5.487596               | 3.550429  | -0.063310 |
| 10               | 8                | 0              | -5.074882               | 2.353688  | -2.057176 |
| 11               | 8                | 0              | -3.691468               | 1.443195  | 1.238175  |
| 12               | 6                | 0              | -4.378485               | 1.247881  | 0.005186  |
| 13               | 6                | 0              | -5.692509               | 0.529526  | 0.331890  |
| 14               | 6                | 0              | -5.294303               | -0.948194 | 0.293804  |
| 15               | 6                | 0              | -4.182080               | -1.017311 | -0.766441 |
| 16               | 6                | 0              | -4.658614               | -1.430750 | -2.167686 |
| 17               | 6                | 0              | -3.484261               | -1.591527 | -3.142330 |
| 18               | 6                | 0              | -2.452000               | -2.555236 | -2.547182 |
| 19               | 6                | 0              | -2.028008               | -2.098365 | -1.150999 |
| 20               | 1                | 0              | -1.487189               | -1.147629 | -1.224783 |
| 21               | 8                | 0              | -3.187312               | -1.879718 | -0.289907 |
| 22               | 8                | 0              | -3.675261               | 0.356055  | -0.857936 |
| 23               | 6                | 0              | 0.667292                | 1.595534  | 2.497854  |
| 24               | 6                | 0              | 2.072785                | 2.182849  | 2.303729  |
| 25               | 6                | 0              | 3.262226                | 1.193507  | 2.119321  |
| 26               | 6                | 0              | 3.937931                | 0.829048  | 0.738104  |
| 27               | 7                | 0              | 4.301382                | 2.380540  | 0.212486  |
| 28               | 1                | 0              | 3.604339                | 2.992003  | 0.628977  |
| 29               | 6                | 0              | 4.519992                | 2.842581  | -1.188179 |
| 30               | 6                | 0              | 3.333520                | 2.673949  | -2.177709 |
| 31               | 1                | 0              | 3.572012                | 1.860294  | -2.867953 |
| 32               | 6                | 0              | 3.237311                | 3.959626  | -3.021002 |
| 33               | 6                | 0              | 2.010183                | 2.292454  | -1.464587 |
| 34               | 1                | 0              | 1.889093                | 2.983219  | -0.615372 |
| 35               | 6                | 0              | 0.777471                | 2.514466  | -2.362289 |
| 36               | 6                | 0              | 1.932717                | 0.822874  | -0.939303 |
| 37               | 6                | 0              | 3.167011                | 0.054318  | -0.392978 |
| 38               | 6                | 0              | 2.730807                | -1.402448 | 0.093033  |
| 39               | 6                | 0              | 1.598381                | -1.555542 | 1.149198  |
| 40               | 1                | 0              | 1.683840                | -0.786677 | 1.915059  |
| 41               | 6                | 0              | 1.564668                | -2.944935 | 1.830259  |
| 42               | 1                | 0              | 2.519156                | -3.475341 | 1.790136  |
| 43               | 6                | 0              | 0.996051                | -2.947338 | 3.261880  |
| 44               | 1                | 0              | 1.685388                | -2.449198 | 3.955315  |
| 45               | 8                | 0              | 0.916366                | -4.304241 | 3.712233  |
| 46               | 6                | 0              | -0.378879               | -2.230129 | 3.289493  |
| 47               | 1                | 0              | -0.161007               | -1.160653 | 3.185641  |
| 48               | 6                | 0              | -1.108833               | -2.426299 | 4.622453  |
| 49               | 6                | 0              | -1.256188               | -2.626718 | 2.078838  |
| 50               | 6                | 0              | -0.419809               | -2.713448 | 0.791332  |
| 51               | 8                | 0              | 0.273759                | -1.463463 | 0.583529  |
| 52               | 6                | 0              | -1.138603               | -3.139321 | -0.486152 |
| 53               | 8                | 0              | 0.622529                | -3.672468 | 1.031741  |
| 54               | 1                | 0              | 3.628248                | -1.788986 | 0.599398  |
| 55               | 6                | 0              | 2.370228                | -2.288871 | -1.092968 |
| 56               | 6                | 0              | 2.645612                | -2.061009 | -2.382981 |
| 57               | 6                | 0              | 1.999567                | -2.907722 | -3.501085 |
| 58               | 8                | 0              | 2.528338                | -2.786704 | -4.637970 |

|     |   |   |           |           |           |
|-----|---|---|-----------|-----------|-----------|
| 59  | 8 | 0 | 0.989945  | -3.596275 | -3.170048 |
| 60  | 6 | 0 | 3.568980  | -0.940263 | -2.763798 |
| 61  | 6 | 0 | 4.201340  | -0.302219 | -1.522899 |
| 62  | 1 | 0 | -1.068369 | 4.525367  | 3.371372  |
| 63  | 1 | 0 | 0.758469  | 4.282078  | 3.283815  |
| 64  | 1 | 0 | -1.935021 | 1.060633  | 3.035367  |
| 65  | 1 | 0 | -2.560346 | 2.706165  | 3.151794  |
| 66  | 1 | 0 | -2.855340 | 4.073410  | 1.071701  |
| 67  | 1 | 0 | -1.344993 | 3.672246  | 0.265438  |
| 68  | 1 | 0 | -3.210580 | 4.202550  | -1.390380 |
| 69  | 1 | 0 | -2.533136 | 2.588330  | -1.597685 |
| 70  | 1 | 0 | -5.524376 | 4.498008  | -0.610291 |
| 71  | 1 | 0 | -6.496014 | 3.128360  | -0.054345 |
| 72  | 1 | 0 | -5.183129 | 3.747585  | 0.966938  |
| 73  | 1 | 0 | -4.543193 | 1.644263  | -2.450502 |
| 74  | 1 | 0 | -6.087256 | 0.849001  | 1.298487  |
| 75  | 1 | 0 | -6.426525 | 0.761256  | -0.445473 |
| 76  | 1 | 0 | -4.869484 | -1.266230 | 1.249149  |
| 77  | 1 | 0 | -6.126503 | -1.613272 | 0.047481  |
| 78  | 1 | 0 | -5.176470 | -2.393358 | -2.064705 |
| 79  | 1 | 0 | -5.394882 | -0.701396 | -2.526657 |
| 80  | 1 | 0 | -3.845144 | -1.958910 | -4.110165 |
| 81  | 1 | 0 | -3.016340 | -0.615951 | -3.328541 |
| 82  | 1 | 0 | -2.887661 | -3.562218 | -2.474419 |
| 83  | 1 | 0 | -1.554621 | -2.640795 | -3.170334 |
| 84  | 1 | 0 | 0.687120  | 0.896399  | 3.347787  |
| 85  | 1 | 0 | 0.377789  | 0.983380  | 1.638079  |
| 86  | 1 | 0 | 2.009806  | 2.907790  | 1.481651  |
| 87  | 1 | 0 | 2.308820  | 2.782005  | 3.190735  |
| 88  | 1 | 0 | 4.106885  | 1.603446  | 2.682575  |
| 89  | 1 | 0 | 3.049484  | 0.243853  | 2.613082  |
| 90  | 1 | 0 | 4.756905  | 3.910261  | -1.090486 |
| 91  | 1 | 0 | 5.424728  | 2.358104  | -1.558790 |
| 92  | 1 | 0 | 4.220113  | 4.221154  | -3.431747 |
| 93  | 1 | 0 | 2.553971  | 3.841128  | -3.865355 |
| 94  | 1 | 0 | 2.891962  | 4.810990  | -2.419077 |
| 95  | 1 | 0 | 0.872077  | 1.959718  | -3.303167 |
| 96  | 1 | 0 | -0.121502 | 2.145631  | -1.858443 |
| 97  | 1 | 0 | 0.614393  | 3.570222  | -2.599940 |
| 98  | 1 | 0 | 1.143711  | 0.806579  | -0.184098 |
| 99  | 1 | 0 | 1.532708  | 0.210801  | -1.751088 |
| 100 | 1 | 0 | 0.579104  | -4.819965 | 2.962761  |
| 101 | 1 | 0 | -0.501603 | -2.070550 | 5.463885  |
| 102 | 1 | 0 | -2.054578 | -1.871716 | 4.628903  |
| 103 | 1 | 0 | -1.327157 | -3.483955 | 4.797149  |
| 104 | 1 | 0 | -1.719344 | -3.608787 | 2.242662  |
| 105 | 1 | 0 | -2.069397 | -1.908892 | 1.943830  |
| 106 | 1 | 0 | -1.733823 | -4.035102 | -0.270239 |
| 107 | 1 | 0 | -0.368395 | -3.413665 | -1.219220 |
| 108 | 1 | 0 | 1.750096  | -3.148678 | -0.878432 |
| 109 | 1 | 0 | 4.349141  | -1.341696 | -3.421497 |
| 110 | 1 | 0 | 3.035844  | -0.209073 | -3.389882 |
| 111 | 1 | 0 | 4.810855  | 0.551662  | -1.809482 |
| 112 | 1 | 0 | 4.908480  | -1.010127 | -1.084238 |
| 113 | 8 | 0 | 5.118191  | 0.234087  | 0.997605  |
| 114 | 1 | 0 | 5.848559  | 1.031010  | 1.448662  |
| 115 | 8 | 0 | 6.383067  | 2.137100  | 1.736291  |
| 116 | 1 | 0 | 7.310774  | 2.162107  | 1.474652  |
| 117 | 1 | 0 | 5.223199  | 2.529944  | 0.762002  |

**FREQUENCIES:**

(B3LYP/3-21G)

|                | 1         | 2       | 3       |
|----------------|-----------|---------|---------|
|                | A         | A       | A       |
| Frequencies -- | -254.4580 | 24.2510 | 35.1397 |
| Red. masses -- | 3.2762    | 5.1703  | 5.2970  |
| Frc consts --  | 0.1250    | 0.0018  | 0.0039  |
| IR Inten --    | 24.5446   | 0.7422  | 0.1629  |

## structure 2a

ENERGY:

Final Energy in Hartrees: HF = -2483.3357173 (B3LYP/6-31+G(D,P))

COORDINATES:

Standard orientation:

| Center<br>Number | Atomic<br>Number | Atomic<br>Type | Coordinates (Angstroms) |           |           |
|------------------|------------------|----------------|-------------------------|-----------|-----------|
|                  |                  |                | X                       | Y         | Z         |
| 1                | 6                | 0              | 1.670176                | -1.447837 | 4.917288  |
| 2                | 6                | 0              | 1.511821                | -0.728773 | 3.797080  |
| 3                | 6                | 0              | 2.711492                | -0.272424 | 2.984927  |
| 4                | 6                | 0              | 2.826277                | -0.880565 | 1.575822  |
| 5                | 1                | 0              | 1.959298                | -0.595068 | 0.966690  |
| 6                | 6                | 0              | 2.974044                | -2.401696 | 1.580164  |
| 7                | 6                | 0              | 3.333412                | -2.912679 | 0.179696  |
| 8                | 6                | 0              | 4.562933                | -2.193552 | -0.407754 |
| 9                | 6                | 0              | 5.854608                | -2.600365 | 0.305573  |
| 10               | 8                | 0              | 4.743175                | -2.576798 | -1.776385 |
| 11               | 8                | 0              | 3.997884                | -0.261292 | 0.994027  |
| 12               | 6                | 0              | 4.331101                | -0.651110 | -0.331962 |
| 13               | 6                | 0              | 5.510037                | 0.224105  | -0.773439 |
| 14               | 6                | 0              | 4.820284                | 1.457000  | -1.361153 |
| 15               | 6                | 0              | 3.537128                | 0.894513  | -1.989763 |
| 16               | 6                | 0              | 3.658733                | 0.549738  | -3.482381 |
| 17               | 6                | 0              | 2.314671                | 0.100492  | -4.068576 |
| 18               | 6                | 0              | 1.245207                | 1.160472  | -3.778008 |
| 19               | 6                | 0              | 1.185574                | 1.474864  | -2.280967 |
| 20               | 1                | 0              | 0.841215                | 0.588551  | -1.735397 |
| 21               | 8                | 0              | 2.503730                | 1.823295  | -1.774307 |
| 22               | 8                | 0              | 3.279256                | -0.341442 | -1.256705 |
| 23               | 6                | 0              | 0.162650                | -0.282716 | 3.269759  |
| 24               | 6                | 0              | -1.069902               | -0.579327 | 4.133000  |
| 25               | 6                | 0              | -2.399065               | -0.075411 | 3.517302  |
| 26               | 6                | 0              | -2.824036               | -0.901774 | 2.294212  |
| 27               | 7                | 0              | -2.506296               | -5.446575 | -1.289082 |
| 28               | 1                | 0              | -2.942667               | -6.273127 | -1.687952 |
| 29               | 6                | 0              | -2.923026               | -4.249969 | -2.042708 |
| 30               | 6                | 0              | -2.038593               | -3.007528 | -1.798816 |
| 31               | 1                | 0              | -2.550625               | -2.200273 | -2.338530 |
| 32               | 6                | 0              | -0.649479               | -3.163130 | -2.438478 |
| 33               | 6                | 0              | -2.009713               | -2.592730 | -0.289262 |
| 34               | 1                | 0              | -2.952696               | -2.948905 | 0.130648  |
| 35               | 6                | 0              | -0.874574               | -3.282603 | 0.493846  |
| 36               | 6                | 0              | -1.955495               | -1.048177 | -0.097075 |
| 37               | 6                | 0              | -3.013911               | -0.368668 | 0.852868  |
| 38               | 6                | 0              | -2.969933               | 1.200393  | 0.677440  |
| 39               | 6                | 0              | -1.640045               | 1.946443  | 0.962436  |
| 40               | 1                | 0              | -1.290599               | 1.686223  | 1.962334  |
| 41               | 6                | 0              | -1.754451               | 3.489394  | 0.853003  |
| 42               | 1                | 0              | -2.783246               | 3.855846  | 0.866058  |
| 43               | 6                | 0              | -0.879735               | 4.257640  | 1.859474  |
| 44               | 1                | 0              | -1.272974               | 4.143777  | 2.878108  |
| 45               | 8                | 0              | -0.968280               | 5.655155  | 1.568738  |
| 46               | 6                | 0              | 0.575437                | 3.727209  | 1.804454  |
| 47               | 1                | 0              | 0.563117                | 2.751045  | 2.305661  |
| 48               | 6                | 0              | 1.551749                | 4.622349  | 2.575062  |
| 49               | 6                | 0              | 1.035276                | 3.483003  | 0.349943  |
| 50               | 6                | 0              | -0.084928               | 2.878166  | -0.516992 |
| 51               | 8                | 0              | -0.570172               | 1.648796  | 0.046150  |
| 52               | 6                | 0              | 0.251219                | 2.647427  | -1.987930 |
| 53               | 8                | 0              | -1.209059               | 3.763358  | -0.446374 |
| 54               | 1                | 0              | -3.637186               | 1.600346  | 1.464231  |
| 55               | 6                | 0              | -3.540588               | 1.612672  | -0.673651 |
| 56               | 6                | 0              | -4.375634               | 0.886453  | -1.429513 |
| 57               | 6                | 0              | -4.854780               | 1.401198  | -2.812500 |
| 58               | 8                | 0              | -5.702511               | 0.656763  | -3.378602 |



|     |   |   |           |           |           |
|-----|---|---|-----------|-----------|-----------|
| 59  | 8 | 0 | -4.349871 | 2.481026  | -3.215594 |
| 60  | 6 | 0 | -4.854498 | -0.464866 | -0.979729 |
| 61  | 6 | 0 | -4.479218 | -0.776867 | 0.471794  |
| 62  | 1 | 0 | 2.659249  | -1.736253 | 5.263211  |
| 63  | 1 | 0 | 0.830585  | -1.774801 | 5.522225  |
| 64  | 1 | 0 | 2.678584  | 0.818696  | 2.865277  |
| 65  | 1 | 0 | 3.634867  | -0.507275 | 3.526848  |
| 66  | 1 | 0 | 3.747932  | -2.685774 | 2.305184  |
| 67  | 1 | 0 | 2.039212  | -2.859309 | 1.920461  |
| 68  | 1 | 0 | 3.527441  | -3.991132 | 0.189322  |
| 69  | 1 | 0 | 2.483765  | -2.747810 | -0.493607 |
| 70  | 1 | 0 | 5.957457  | -3.689544 | 0.273498  |
| 71  | 1 | 0 | 6.724067  | -2.166098 | -0.195062 |
| 72  | 1 | 0 | 5.854103  | -2.275665 | 1.348392  |
| 73  | 1 | 0 | 3.967929  | -2.246177 | -2.255040 |
| 74  | 1 | 0 | 6.167707  | 0.452603  | 0.067417  |
| 75  | 1 | 0 | 6.082280  | -0.308808 | -1.538421 |
| 76  | 1 | 0 | 4.532230  | 2.159319  | -0.574736 |
| 77  | 1 | 0 | 5.431494  | 1.989108  | -2.095068 |
| 78  | 1 | 0 | 3.996093  | 1.455983  | -4.001829 |
| 79  | 1 | 0 | 4.435007  | -0.212408 | -3.615276 |
| 80  | 1 | 0 | 2.409958  | -0.066773 | -5.147724 |
| 81  | 1 | 0 | 2.013234  | -0.856596 | -3.624192 |
| 82  | 1 | 0 | 1.475430  | 2.082631  | -4.329986 |
| 83  | 1 | 0 | 0.257003  | 0.822608  | -4.108762 |
| 84  | 1 | 0 | 0.229510  | 0.799353  | 3.095350  |
| 85  | 1 | 0 | 0.020941  | -0.716159 | 2.270860  |
| 86  | 1 | 0 | -1.167239 | -1.657107 | 4.301345  |
| 87  | 1 | 0 | -0.947255 | -0.110496 | 5.117163  |
| 88  | 1 | 0 | -3.193795 | -0.239068 | 4.255288  |
| 89  | 1 | 0 | -2.360416 | 0.995980  | 3.323444  |
| 90  | 1 | 0 | -2.876011 | -4.496813 | -3.111114 |
| 91  | 1 | 0 | -3.967923 | -3.966823 | -1.831518 |
| 92  | 1 | 0 | -0.744696 | -3.281320 | -3.524587 |
| 93  | 1 | 0 | -0.023490 | -2.281406 | -2.257419 |
| 94  | 1 | 0 | -0.127400 | -4.043368 | -2.051692 |
| 95  | 1 | 0 | 0.102215  | -2.902280 | 0.174526  |
| 96  | 1 | 0 | -0.971305 | -3.091505 | 1.566380  |
| 97  | 1 | 0 | -0.875372 | -4.364052 | 0.339404  |
| 98  | 1 | 0 | -0.956856 | -0.754874 | 0.241128  |
| 99  | 1 | 0 | -2.082609 | -0.548122 | -1.060120 |
| 100 | 1 | 0 | -0.957620 | 5.736840  | 0.601976  |
| 101 | 1 | 0 | 1.250337  | 4.725764  | 3.624520  |
| 102 | 1 | 0 | 2.562385  | 4.198352  | 2.553311  |
| 103 | 1 | 0 | 1.587064  | 5.625808  | 2.140938  |
| 104 | 1 | 0 | 1.333936  | 4.430505  | -0.117825 |
| 105 | 1 | 0 | 1.910141  | 2.829767  | 0.329196  |
| 106 | 1 | 0 | 0.679751  | 3.565034  | -2.407352 |
| 107 | 1 | 0 | -0.703010 | 2.463749  | -2.493180 |
| 108 | 1 | 0 | -3.238631 | 2.571110  | -1.085713 |
| 109 | 1 | 0 | -5.941102 | -0.517172 | -1.110176 |
| 110 | 1 | 0 | -4.464858 | -1.231678 | -1.661634 |
| 111 | 1 | 0 | -4.627421 | -1.837597 | 0.687592  |
| 112 | 1 | 0 | -5.156075 | -0.228283 | 1.143478  |
| 113 | 8 | 0 | -3.055057 | -2.086824 | 2.532852  |
| 114 | 1 | 0 | -3.520922 | -3.921311 | 2.048884  |
| 115 | 8 | 0 | -3.802776 | -4.820283 | 1.797969  |
| 116 | 1 | 0 | -4.760668 | -4.822547 | 1.909717  |
| 117 | 1 | 0 | -2.830691 | -5.387809 | -0.323668 |

**FREQUENCIES:**

(B3LYP/3-21G)

|                | 1       | 2       | 3       |
|----------------|---------|---------|---------|
|                | A       | A       | A       |
| Frequencies -- | 23.1128 | 31.0968 | 37.2714 |
| Red. masses -- | 5.2263  | 5.1115  | 5.6867  |
| Frc consts --  | 0.0016  | 0.0029  | 0.0047  |
| IR Inten --    | 0.1950  | 0.3413  | 4.9136  |

## structure 2b

ENERGY:

Final Energy in Hartrees: HF = -2483.3373149 (B3LYP/6-31+G(D,P))

COORDINATES:

Standard orientation:

| Center<br>Number | Atomic<br>Number | Atomic<br>Type | Coordinates (Angstroms) |           |           |
|------------------|------------------|----------------|-------------------------|-----------|-----------|
|                  |                  |                | X                       | Y         | Z         |
| 1                | 6                | 0              | 1.363876                | -2.687475 | 4.368656  |
| 2                | 6                | 0              | 1.263994                | -1.689985 | 3.478483  |
| 3                | 6                | 0              | 2.506168                | -1.027330 | 2.906991  |
| 4                | 6                | 0              | 2.742214                | -1.251755 | 1.403074  |
| 5                | 1                | 0              | 1.912188                | -0.831918 | 0.820621  |
| 6                | 6                | 0              | 2.940039                | -2.721388 | 1.033547  |
| 7                | 6                | 0              | 3.413924                | -2.852522 | -0.418697 |
| 8                | 6                | 0              | 4.659772                | -1.992781 | -0.708297 |
| 9                | 6                | 0              | 5.909561                | -2.552759 | -0.025348 |
| 10               | 8                | 0              | 4.946063                | -2.011638 | -2.112123 |
| 11               | 8                | 0              | 3.932632                | -0.490013 | 1.089469  |
| 12               | 6                | 0              | 4.374593                | -0.523982 | -0.260852 |
| 13               | 6                | 0              | 5.554021                | 0.449887  | -0.369543 |
| 14               | 6                | 0              | 4.868382                | 1.783343  | -0.675628 |
| 15               | 6                | 0              | 3.651143                | 1.387383  | -1.523125 |
| 16               | 6                | 0              | 3.884377                | 1.447383  | -3.040765 |
| 17               | 6                | 0              | 2.597505                | 1.153098  | -3.821429 |
| 18               | 6                | 0              | 1.479045                | 2.087316  | -3.343582 |
| 19               | 6                | 0              | 1.307967                | 1.995766  | -1.825023 |
| 20               | 1                | 0              | 0.954746                | 0.993432  | -1.555812 |
| 21               | 8                | 0              | 2.577428                | 2.213486  | -1.150097 |
| 22               | 8                | 0              | 3.384566                | -0.002213 | -1.158281 |
| 23               | 6                | 0              | -0.057202               | -1.118883 | 3.001733  |
| 24               | 6                | 0              | -1.335154               | -1.652074 | 3.661281  |
| 25               | 6                | 0              | -2.642774               | -1.022274 | 3.114564  |
| 26               | 6                | 0              | -2.979439               | -1.504250 | 1.698393  |
| 27               | 7                | 0              | -3.226789               | -4.597990 | -2.921569 |
| 28               | 1                | 0              | -3.242143               | -4.858978 | -1.939538 |
| 29               | 6                | 0              | -1.957454               | -3.955601 | -3.288919 |
| 30               | 6                | 0              | -1.802995               | -2.545862 | -2.687065 |
| 31               | 1                | 0              | -2.637177               | -1.950346 | -3.077941 |
| 32               | 6                | 0              | -0.495791               | -1.921922 | -3.205696 |
| 33               | 6                | 0              | -1.936952               | -2.521341 | -1.134052 |
| 34               | 1                | 0              | -2.902142               | -2.978741 | -0.902416 |
| 35               | 6                | 0              | -0.853002               | -3.366037 | -0.437451 |
| 36               | 6                | 0              | -1.958617               | -1.060162 | -0.594538 |
| 37               | 6                | 0              | -3.077400               | -0.630525 | 0.426069  |
| 38               | 6                | 0              | -3.039782               | 0.932931  | 0.647857  |
| 39               | 6                | 0              | -1.751996               | 1.583307  | 1.216182  |
| 40               | 1                | 0              | -1.467600               | 1.076519  | 2.138756  |
| 41               | 6                | 0              | -1.898182               | 3.102224  | 1.497245  |
| 42               | 1                | 0              | -2.934689               | 3.445486  | 1.522540  |
| 43               | 6                | 0              | -1.119730               | 3.594702  | 2.729993  |
| 44               | 1                | 0              | -1.583053               | 3.224654  | 3.653755  |
| 45               | 8                | 0              | -1.220501               | 5.019652  | 2.794394  |
| 46               | 6                | 0              | 0.348091                | 3.102975  | 2.653867  |
| 47               | 1                | 0              | 0.321423                | 2.031421  | 2.887579  |
| 48               | 6                | 0              | 1.243920                | 3.775585  | 3.699415  |
| 49               | 6                | 0              | 0.919658                | 3.239102  | 1.223799  |
| 50               | 6                | 0              | -0.119603               | 2.874371  | 0.147131  |
| 51               | 8                | 0              | -0.612708               | 1.537668  | 0.335596  |
| 52               | 6                | 0              | 0.322412                | 3.039403  | -1.304647 |
| 53               | 8                | 0              | -1.266040               | 3.705164  | 0.357886  |
| 54               | 1                | 0              | -3.775590               | 1.127092  | 1.450785  |
| 55               | 6                | 0              | -3.498492               | 1.668160  | -0.604797 |
| 56               | 6                | 0              | -4.269676               | 1.158930  | -1.575073 |
| 57               | 6                | 0              | -4.622554               | 1.996866  | -2.832116 |
| 58               | 8                | 0              | -5.486409               | 1.469186  | -3.584930 |

|     |   |   |           |           |           |
|-----|---|---|-----------|-----------|-----------|
| 59  | 8 | 0 | -4.011946 | 3.090038  | -2.966158 |
| 60  | 6 | 0 | -4.790002 | -0.248780 | -1.496809 |
| 61  | 6 | 0 | -4.509724 | -0.921029 | -0.147755 |
| 62  | 1 | 0 | 2.334999  | -3.053959 | 4.691309  |
| 63  | 1 | 0 | 0.495041  | -3.171623 | 4.802483  |
| 64  | 1 | 0 | 2.451503  | 0.057289  | 3.068834  |
| 65  | 1 | 0 | 3.393694  | -1.386219 | 3.440813  |
| 66  | 1 | 0 | 3.670735  | -3.168921 | 1.719898  |
| 67  | 1 | 0 | 1.999978  | -3.264383 | 1.177154  |
| 68  | 1 | 0 | 3.641101  | -3.894953 | -0.669618 |
| 69  | 1 | 0 | 2.610739  | -2.528330 | -1.091699 |
| 70  | 1 | 0 | 6.046690  | -3.597723 | -0.320835 |
| 71  | 1 | 0 | 6.798485  | -1.997242 | -0.335630 |
| 72  | 1 | 0 | 5.827801  | -2.500539 | 1.062517  |
| 73  | 1 | 0 | 4.209438  | -1.552182 | -2.543608 |
| 74  | 1 | 0 | 6.139447  | 0.463573  | 0.551785  |
| 75  | 1 | 0 | 6.199793  | 0.139573  | -1.196201 |
| 76  | 1 | 0 | 4.502803  | 2.255570  | 0.239703  |
| 77  | 1 | 0 | 5.512759  | 2.494262  | -1.199689 |
| 78  | 1 | 0 | 4.229098  | 2.461874  | -3.279143 |
| 79  | 1 | 0 | 4.690765  | 0.756059  | -3.310717 |
| 80  | 1 | 0 | 2.771353  | 1.276594  | -4.896697 |
| 81  | 1 | 0 | 2.295813  | 0.109508  | -3.665604 |
| 82  | 1 | 0 | 1.718970  | 3.124836  | -3.615451 |
| 83  | 1 | 0 | 0.526247  | 1.839034  | -3.823791 |
| 84  | 1 | 0 | -0.004028 | -0.031571 | 3.144709  |
| 85  | 1 | 0 | -0.119338 | -1.251158 | 1.913266  |
| 86  | 1 | 0 | -1.404954 | -2.737477 | 3.538347  |
| 87  | 1 | 0 | -1.293880 | -1.462499 | 4.740454  |
| 88  | 1 | 0 | -3.467494 | -1.383437 | 3.740844  |
| 89  | 1 | 0 | -2.623250 | 0.063254  | 3.204951  |
| 90  | 1 | 0 | -1.071684 | -4.563217 | -3.029587 |
| 91  | 1 | 0 | -1.952495 | -3.854880 | -4.381107 |
| 92  | 1 | 0 | -0.508268 | -1.858423 | -4.300090 |
| 93  | 1 | 0 | -0.352983 | -0.907733 | -2.822167 |
| 94  | 1 | 0 | 0.380663  | -2.516358 | -2.919776 |
| 95  | 1 | 0 | 0.147070  | -2.951569 | -0.608776 |
| 96  | 1 | 0 | -1.023052 | -3.402966 | 0.641058  |
| 97  | 1 | 0 | -0.843726 | -4.402088 | -0.796042 |
| 98  | 1 | 0 | -0.983311 | -0.818484 | -0.160510 |
| 99  | 1 | 0 | -2.073176 | -0.363734 | -1.427921 |
| 100 | 1 | 0 | -1.133289 | 5.341579  | 1.883335  |
| 101 | 1 | 0 | 0.862561  | 3.607821  | 4.713912  |
| 102 | 1 | 0 | 2.262676  | 3.373799  | 3.650100  |
| 103 | 1 | 0 | 1.289136  | 4.856631  | 3.538074  |
| 104 | 1 | 0 | 1.232707  | 4.274967  | 1.036687  |
| 105 | 1 | 0 | 1.806605  | 2.612988  | 1.106294  |
| 106 | 1 | 0 | 0.751426  | 4.039375  | -1.437194 |
| 107 | 1 | 0 | -0.590036 | 2.985948  | -1.908375 |
| 108 | 1 | 0 | -3.153440 | 2.686616  | -0.755234 |
| 109 | 1 | 0 | -5.867112 | -0.240452 | -1.697108 |
| 110 | 1 | 0 | -4.370661 | -0.835369 | -2.324231 |
| 111 | 1 | 0 | -4.659429 | -2.000805 | -0.218329 |
| 112 | 1 | 0 | -5.236066 | -0.556982 | 0.593659  |
| 113 | 8 | 0 | -3.217609 | -2.709074 | 1.594128  |
| 114 | 1 | 0 | -3.579346 | -3.872102 | 2.985968  |
| 115 | 8 | 0 | -3.825907 | -4.447494 | 3.739151  |
| 116 | 1 | 0 | -4.579799 | -4.960929 | 3.426807  |
| 117 | 1 | 0 | -3.369147 | -5.447704 | -3.459909 |

**FREQUENCIES:**

(B3LYP/3-21G)

|                | 1       | 2       | 3       |
|----------------|---------|---------|---------|
|                | A       | A       | A       |
| Frequencies -- | 22.2062 | 32.9799 | 35.2448 |
| Red. masses -- | 3.8003  | 4.5865  | 4.5442  |
| Frc consts --  | 0.0011  | 0.0029  | 0.0033  |
| IR Inten --    | 1.8905  | 1.5164  | 0.6961  |

## structure 2c

ENERGY:

Final Energy in Hartrees: HF = -2483.3444967 (B3LYP/6-31+G(D,P))

COORDINATES:

Standard orientation:

| Center<br>Number | Atomic<br>Number | Atomic<br>Type | Coordinates (Angstroms) |           |           |
|------------------|------------------|----------------|-------------------------|-----------|-----------|
|                  |                  |                | X                       | Y         | Z         |
| 1                | 6                | 0              | 3.032587                | 3.248663  | 3.625499  |
| 2                | 6                | 0              | 2.521839                | 2.756062  | 2.488930  |
| 3                | 6                | 0              | 3.423045                | 2.303162  | 1.354825  |
| 4                | 6                | 0              | 3.442375                | 0.780390  | 1.126169  |
| 5                | 1                | 0              | 2.444208                | 0.429175  | 0.836355  |
| 6                | 6                | 0              | 3.930592                | -0.017659 | 2.333165  |
| 7                | 6                | 0              | 4.137544                | -1.487682 | 1.949479  |
| 8                | 6                | 0              | 5.045129                | -1.653276 | 0.716252  |
| 9                | 6                | 0              | 6.503406                | -1.314894 | 1.033881  |
| 10               | 8                | 0              | 5.051492                | -3.023821 | 0.292862  |
| 11               | 8                | 0              | 4.324139                | 0.577934  | -0.007449 |
| 12               | 6                | 0              | 4.493424                | -0.762118 | -0.442150 |
| 13               | 6                | 0              | 5.347170                | -0.718253 | -1.715636 |
| 14               | 6                | 0              | 4.305229                | -0.545864 | -2.823205 |
| 15               | 6                | 0              | 3.084461                | -1.320788 | -2.305718 |
| 16               | 6                | 0              | 2.993983                | -2.773353 | -2.800069 |
| 17               | 6                | 0              | 1.699228                | -3.445963 | -2.327066 |
| 18               | 6                | 0              | 0.493620                | -2.591689 | -2.737173 |
| 19               | 6                | 0              | 0.651544                | -1.150860 | -2.245277 |
| 20               | 1                | 0              | 0.621377                | -1.132971 | -1.149512 |
| 21               | 8                | 0              | 1.930624                | -0.600826 | -2.664799 |
| 22               | 8                | 0              | 3.248414                | -1.345702 | -0.857447 |
| 23               | 6                | 0              | 1.031811                | 2.626437  | 2.229193  |
| 24               | 6                | 0              | 0.109413                | 2.571310  | 3.458335  |
| 25               | 6                | 0              | -1.329541               | 2.140519  | 3.113744  |
| 26               | 6                | 0              | -1.409457               | 0.726207  | 2.522533  |
| 27               | 7                | 0              | -3.460302               | -2.407219 | -1.751230 |
| 28               | 1                | 0              | -4.217321               | -1.713075 | -1.843500 |
| 29               | 6                | 0              | -3.806462               | -3.371013 | -0.689438 |
| 30               | 6                | 0              | -2.763991               | -3.536540 | 0.455949  |
| 31               | 1                | 0              | -1.763493               | -3.521659 | -0.004632 |
| 32               | 6                | 0              | -2.970541               | -4.932215 | 1.079355  |
| 33               | 6                | 0              | -2.817523               | -2.392110 | 1.523479  |
| 34               | 1                | 0              | -3.882161               | -2.245052 | 1.746950  |
| 35               | 6                | 0              | -2.119891               | -2.785237 | 2.840774  |
| 36               | 6                | 0              | -2.234515               | -1.082783 | 0.925785  |
| 37               | 6                | 0              | -2.560389               | 0.303569  | 1.594303  |
| 38               | 6                | 0              | -2.884049               | 1.395039  | 0.483107  |
| 39               | 6                | 0              | -1.684197               | 1.973831  | -0.298635 |
| 40               | 1                | 0              | -1.147973               | 2.656220  | 0.371086  |
| 41               | 6                | 0              | -2.055470               | 2.719633  | -1.602260 |
| 42               | 1                | 0              | -3.109293               | 2.997209  | -1.665575 |
| 43               | 6                | 0              | -1.150471               | 3.921126  | -1.923888 |
| 44               | 1                | 0              | -1.345107               | 4.743737  | -1.223776 |
| 45               | 8                | 0              | -1.502252               | 4.425292  | -3.215802 |
| 46               | 6                | 0              | 0.336099                | 3.499784  | -1.832326 |
| 47               | 1                | 0              | 0.555258                | 3.384197  | -0.763463 |
| 48               | 6                | 0              | 1.282937                | 4.571737  | -2.382389 |
| 49               | 6                | 0              | 0.567029                | 2.123574  | -2.492912 |
| 50               | 6                | 0              | -0.567913               | 1.133048  | -2.172834 |
| 51               | 8                | 0              | -0.737890               | 0.990120  | -0.753181 |
| 52               | 6                | 0              | -0.451574               | -0.251879 | -2.801434 |
| 53               | 8                | 0              | -1.800410               | 1.725867  | -2.610142 |
| 54               | 1                | 0              | -3.259082               | 2.276612  | 1.028849  |
| 55               | 6                | 0              | -4.025085               | 0.859970  | -0.355292 |
| 56               | 6                | 0              | -5.085308               | 0.262508  | 0.205811  |
| 57               | 6                | 0              | -6.226100               | -0.319463 | -0.646165 |
| 58               | 8                | 0              | -7.347331               | -0.365356 | -0.080378 |

|     |   |   |           |           |           |
|-----|---|---|-----------|-----------|-----------|
| 59  | 8 | 0 | -5.909862 | -0.701233 | -1.812208 |
| 60  | 6 | 0 | -5.185662 | 0.099489  | 1.703085  |
| 61  | 6 | 0 | -3.854613 | 0.306206  | 2.484812  |
| 62  | 1 | 0 | 4.106596  | 3.337037  | 3.766748  |
| 63  | 1 | 0 | 2.407111  | 3.565384  | 4.454276  |
| 64  | 1 | 0 | 3.103027  | 2.771230  | 0.414117  |
| 65  | 1 | 0 | 4.452313  | 2.629873  | 1.542646  |
| 66  | 1 | 0 | 4.867611  | 0.421894  | 2.701054  |
| 67  | 1 | 0 | 3.203828  | 0.049220  | 3.148658  |
| 68  | 1 | 0 | 4.567248  | -2.055824 | 2.782278  |
| 69  | 1 | 0 | 3.162701  | -1.937832 | 1.724503  |
| 70  | 1 | 0 | 6.836942  | -1.915598 | 1.885940  |
| 71  | 1 | 0 | 7.148708  | -1.550966 | 0.183289  |
| 72  | 1 | 0 | 6.621851  | -0.257337 | 1.279644  |
| 73  | 1 | 0 | 4.150093  | -3.214971 | -0.007725 |
| 74  | 1 | 0 | 6.073816  | 0.095322  | -1.672499 |
| 75  | 1 | 0 | 5.881744  | -1.666728 | -1.821511 |
| 76  | 1 | 0 | 4.018278  | 0.503019  | -2.933025 |
| 77  | 1 | 0 | 4.638685  | -0.917434 | -3.796069 |
| 78  | 1 | 0 | 3.011461  | -2.749537 | -3.897470 |
| 79  | 1 | 0 | 3.882274  | -3.323609 | -2.469697 |
| 80  | 1 | 0 | 1.620805  | -4.454755 | -2.749643 |
| 81  | 1 | 0 | 1.715313  | -3.558829 | -1.235454 |
| 82  | 1 | 0 | 0.400086  | -2.585890 | -3.832821 |
| 83  | 1 | 0 | -0.439871 | -2.995738 | -2.331076 |
| 84  | 1 | 0 | 0.731905  | 3.466236  | 1.582845  |
| 85  | 1 | 0 | 0.869306  | 1.728753  | 1.625113  |
| 86  | 1 | 0 | 0.525769  | 1.872978  | 4.189791  |
| 87  | 1 | 0 | 0.066719  | 3.551964  | 3.947820  |
| 88  | 1 | 0 | -1.927202 | 2.120223  | 4.036273  |
| 89  | 1 | 0 | -1.821259 | 2.868120  | 2.462038  |
| 90  | 1 | 0 | -4.772912 | -3.097531 | -0.244088 |
| 91  | 1 | 0 | -3.954134 | -4.366091 | -1.132467 |
| 92  | 1 | 0 | -2.948298 | -5.703588 | 0.300402  |
| 93  | 1 | 0 | -2.198914 | -5.185493 | 1.811559  |
| 94  | 1 | 0 | -3.944942 | -5.003800 | 1.581475  |
| 95  | 1 | 0 | -1.075128 | -3.069037 | 2.659766  |
| 96  | 1 | 0 | -2.100755 | -1.949844 | 3.544133  |
| 97  | 1 | 0 | -2.621620 | -3.623174 | 3.335076  |
| 98  | 1 | 0 | -1.146555 | -1.191110 | 0.897504  |
| 99  | 1 | 0 | -2.556828 | -1.032692 | -0.110509 |
| 100 | 1 | 0 | -1.663450 | 3.651811  | -3.778482 |
| 101 | 1 | 0 | 1.153384  | 5.523527  | -1.852953 |
| 102 | 1 | 0 | 2.327302  | 4.259713  | -2.266021 |
| 103 | 1 | 0 | 1.091825  | 4.755192  | -3.443869 |
| 104 | 1 | 0 | 0.614192  | 2.226683  | -3.585322 |
| 105 | 1 | 0 | 1.522760  | 1.703055  | -2.174060 |
| 106 | 1 | 0 | -0.313962 | -0.141218 | -3.883693 |
| 107 | 1 | 0 | -1.409770 | -0.754375 | -2.626661 |
| 108 | 1 | 0 | -3.961826 | 0.885170  | -1.438575 |
| 109 | 1 | 0 | -5.941994 | 0.795771  | 2.087008  |
| 110 | 1 | 0 | -5.606503 | -0.890782 | 1.906530  |
| 111 | 1 | 0 | -3.763754 | -0.453707 | 3.267852  |
| 112 | 1 | 0 | -3.896619 | 1.272443  | 3.001672  |
| 113 | 8 | 0 | -0.550314 | -0.082429 | 2.863048  |
| 114 | 1 | 0 | 0.718567  | -0.492298 | 4.150321  |
| 115 | 8 | 0 | 1.372544  | -0.791287 | 4.811415  |
| 116 | 1 | 0 | 1.191191  | -1.731120 | 4.929590  |
| 117 | 1 | 0 | -3.422908 | -2.887777 | -2.645346 |

**FREQUENCIES:**

(B3LYP/3-21G)

|                | 1       | 2       | 3       |
|----------------|---------|---------|---------|
|                | A       | A       | A       |
| Frequencies -- | 31.5242 | 39.2572 | 44.0915 |
| Red. masses -- | 5.2204  | 4.7938  | 4.8531  |
| Frc consts --  | 0.0031  | 0.0044  | 0.0056  |
| IR Inten --    | 0.5364  | 0.2384  | 1.0372  |

## structure 13f

ENERGY:

Final Energy in Hartrees: HF = -982.3608130 (B3LYP/6-31+G(D,P))

COORDINATES:

Standard orientation:

| Center<br>Number | Atomic<br>Number | Atomic<br>Type | Coordinates (Angstroms) |           |           |
|------------------|------------------|----------------|-------------------------|-----------|-----------|
|                  |                  |                | X                       | Y         | Z         |
| 1                | 6                | 0              | 1.008252                | -2.232087 | 1.309191  |
| 2                | 6                | 0              | 0.919680                | -1.062946 | 0.344494  |
| 3                | 7                | 0              | 2.019280                | -0.785195 | -0.264910 |
| 4                | 1                | 0              | 3.511768                | -1.627150 | -0.086532 |
| 5                | 6                | 0              | 2.115280                | 0.274886  | -1.271380 |
| 6                | 6                | 0              | 2.089922                | 1.694535  | -0.671970 |
| 7                | 1                | 0              | 2.024211                | 2.379124  | -1.532427 |
| 8                | 6                | 0              | 3.389761                | 2.005012  | 0.088334  |
| 9                | 6                | 0              | 0.829714                | 1.917357  | 0.206596  |
| 10               | 1                | 0              | 1.075766                | 1.583701  | 1.222898  |
| 11               | 6                | 0              | 0.471780                | 3.411471  | 0.284641  |
| 12               | 6                | 0              | -0.381287               | 1.104575  | -0.299323 |
| 13               | 6                | 0              | -0.459777               | -0.407292 | 0.104628  |
| 14               | 6                | 0              | -1.404804               | -0.566629 | 1.350586  |
| 15               | 6                | 0              | -1.020627               | 0.302887  | 2.564746  |
| 16               | 1                | 0              | 0.016382                | 0.148822  | 2.887075  |
| 17               | 1                | 0              | -1.326822               | -1.610269 | 1.683325  |
| 18               | 6                | 0              | -2.860470               | -0.337526 | 0.985784  |
| 19               | 6                | 0              | -3.383017               | -0.404103 | -0.247379 |
| 20               | 6                | 0              | -4.892826               | -0.152643 | -0.500282 |
| 21               | 8                | 0              | -5.244787               | -0.268871 | -1.707801 |
| 22               | 8                | 0              | -5.591781               | 0.134649  | 0.505356  |
| 23               | 6                | 0              | -2.514865               | -0.712560 | -1.439827 |
| 24               | 6                | 0              | -1.121989               | -1.232148 | -1.051853 |
| 25               | 1                | 0              | 2.014885                | -2.652414 | 1.285641  |
| 26               | 1                | 0              | 0.288692                | -3.014562 | 1.042938  |
| 27               | 1                | 0              | 3.065287                | 0.128492  | -1.797741 |
| 28               | 1                | 0              | 1.320862                | 0.171506  | -2.018491 |
| 29               | 1                | 0              | 4.265839                | 1.907312  | -0.562098 |
| 30               | 1                | 0              | 3.382773                | 3.023250  | 0.492424  |
| 31               | 1                | 0              | 3.521721                | 1.312288  | 0.926975  |
| 32               | 1                | 0              | 0.130588                | 3.779105  | -0.691549 |
| 33               | 1                | 0              | -0.336718               | 3.586321  | 1.002828  |
| 34               | 1                | 0              | 1.328798                | 4.022042  | 0.590635  |
| 35               | 1                | 0              | -1.302146               | 1.572388  | 0.059985  |
| 36               | 1                | 0              | -0.430781               | 1.201240  | -1.390592 |
| 37               | 1                | 0              | -3.549083               | -0.113057 | 1.799397  |
| 38               | 1                | 0              | -3.029743               | -1.444367 | -2.071370 |
| 39               | 1                | 0              | -2.438301               | 0.183915  | -2.070849 |
| 40               | 1                | 0              | -0.459761               | -1.234524 | -1.927697 |
| 41               | 1                | 0              | -1.209271               | -2.276485 | -0.723199 |
| 42               | 8                | 0              | 6.696461                | -0.576842 | -0.547441 |
| 43               | 1                | 0              | 6.987609                | -0.284842 | 0.323832  |
| 44               | 1                | 0              | -1.156734               | 1.369157  | 2.358060  |
| 45               | 1                | 0              | -1.673562               | 0.055871  | 3.409181  |
| 46               | 1                | 0              | 0.780974                | -1.927467 | 2.335125  |
| 47               | 8                | 0              | 4.405970                | -2.090103 | -0.030155 |
| 48               | 1                | 0              | 5.878120                | -1.095066 | -0.380458 |
| 49               | 1                | 0              | 4.348424                | -2.855363 | -0.614533 |

FREQUENCIES:

(B3LYP/6-31+G(D,P))

|                | 1       | 2       | 3       |
|----------------|---------|---------|---------|
|                | A       | A       | A       |
| Frequencies -- | 13.9793 | 20.2580 | 37.7704 |
| Red. masses -- | 5.9897  | 5.5352  | 8.9289  |

|            |    |        |        |        |
|------------|----|--------|--------|--------|
| Frc consts | -- | 0.0007 | 0.0013 | 0.0075 |
| IR Inten   | -- | 4.4568 | 4.8293 | 1.5012 |

## structure 13g

ENERGY:

Final Energy in Hartrees: HF = -982.3104147 (B3LYP/6-31+G(D,P))

COORDINATES:

Standard orientation:

| Center<br>Number | Atomic<br>Number | Atomic<br>Type | Coordinates (Angstroms) |           |           |
|------------------|------------------|----------------|-------------------------|-----------|-----------|
|                  |                  |                | X                       | Y         | Z         |
| 1                | 6                | 0              | 1.399543                | -1.997929 | 1.603772  |
| 2                | 6                | 0              | 1.316690                | -0.947801 | 0.523459  |
| 3                | 7                | 0              | 2.458571                | -0.318175 | 0.287692  |
| 4                | 1                | 0              | 3.278350                | -0.856824 | 0.579146  |
| 5                | 6                | 0              | 2.733707                | 0.488729  | -0.916377 |
| 6                | 6                | 0              | 2.357334                | 1.965104  | -0.762894 |
| 7                | 1                | 0              | 2.351987                | 2.384033  | -1.781160 |
| 8                | 6                | 0              | 3.405863                | 2.725695  | 0.065410  |
| 9                | 6                | 0              | 0.932195                | 2.111134  | -0.174755 |
| 10               | 1                | 0              | 1.036303                | 2.070396  | 0.913685  |
| 11               | 6                | 0              | 0.323443                | 3.478325  | -0.533527 |
| 12               | 6                | 0              | -0.022994               | 0.982722  | -0.634795 |
| 13               | 6                | 0              | -0.055888               | -0.388010 | 0.117489  |
| 14               | 6                | 0              | -0.962370               | -0.284917 | 1.421754  |
| 15               | 6                | 0              | -0.540119               | 0.764902  | 2.469498  |
| 16               | 1                | 0              | 0.520318                | 0.703718  | 2.741778  |
| 17               | 1                | 0              | -0.888053               | -1.259571 | 1.919139  |
| 18               | 6                | 0              | -2.426387               | -0.086112 | 1.073908  |
| 19               | 6                | 0              | -3.009874               | -0.391591 | -0.093246 |
| 20               | 6                | 0              | -4.521165               | -0.134093 | -0.328237 |
| 21               | 8                | 0              | -4.938260               | -0.478237 | -1.469062 |
| 22               | 8                | 0              | -5.158547               | 0.382708  | 0.626324  |
| 23               | 6                | 0              | -2.199645               | -0.969208 | -1.222431 |
| 24               | 6                | 0              | -0.792155               | -1.420241 | -0.805428 |
| 25               | 1                | 0              | 2.380519                | -2.472747 | 1.580194  |
| 26               | 1                | 0              | 0.637387                | -2.762797 | 1.460363  |
| 27               | 1                | 0              | 3.804142                | 0.377606  | -1.108281 |
| 28               | 1                | 0              | 2.215958                | 0.014189  | -1.751322 |
| 29               | 1                | 0              | 4.389346                | 2.698569  | -0.418845 |
| 30               | 1                | 0              | 3.131815                | 3.776933  | 0.201744  |
| 31               | 1                | 0              | 3.510072                | 2.277319  | 1.061006  |
| 32               | 1                | 0              | 0.118596                | 3.538922  | -1.610068 |
| 33               | 1                | 0              | -0.625416               | 3.636541  | -0.010102 |
| 34               | 1                | 0              | 0.991409                | 4.307440  | -0.273447 |
| 35               | 1                | 0              | -1.046237               | 1.360958  | -0.568390 |
| 36               | 1                | 0              | 0.145190                | 0.798948  | -1.703600 |
| 37               | 1                | 0              | -3.064960               | 0.336241  | 1.849051  |
| 38               | 1                | 0              | -2.746024               | -1.816996 | -1.650525 |
| 39               | 1                | 0              | -2.156762               | -0.239519 | -2.043112 |
| 40               | 1                | 0              | -0.160136               | -1.611444 | -1.674820 |
| 41               | 1                | 0              | -0.866590               | -2.369360 | -0.260721 |
| 42               | 8                | 0              | 1.965819                | -2.488822 | -1.061659 |
| 43               | 1                | 0              | 1.492240                | -3.294999 | -1.302751 |
| 44               | 1                | 0              | -0.749282               | 1.782532  | 2.126407  |
| 45               | 1                | 0              | -1.128331               | 0.611493  | 3.381371  |
| 46               | 1                | 0              | 1.243994                | -1.537491 | 2.587425  |
| 47               | 8                | 0              | 4.293068                | -2.389681 | -0.163478 |
| 48               | 1                | 0              | 3.352403                | -2.583035 | -0.609026 |
| 49               | 1                | 0              | 4.696055                | -3.231820 | 0.072408  |

FREQUENCIES:

(B3LYP/6-31+G(D,P))

|                |           |         |         |
|----------------|-----------|---------|---------|
|                | 1         | 2       | 3       |
|                | A         | A       | A       |
| Frequencies -- | -203.4857 | 34.9852 | 38.8500 |
| Red. masses -- | 3.4358    | 5.3395  | 7.2671  |



|            |    |          |        |        |
|------------|----|----------|--------|--------|
| Frc consts | -- | 0.0838   | 0.0039 | 0.0065 |
| IR Inten   | -- | 108.2430 | 2.5339 | 4.8421 |

## structure 13h

ENERGY:

Final Energy in Hartrees: HF = -982.3381371 (B3LYP/6-31+G(D,P))

COORDINATES:

Standard orientation:

| Center<br>Number | Atomic<br>Number | Atomic<br>Type | Coordinates (Angstroms) |           |           |
|------------------|------------------|----------------|-------------------------|-----------|-----------|
|                  |                  |                | X                       | Y         | Z         |
| 1                | 6                | 0              | 1.535364                | -2.097975 | 1.486933  |
| 2                | 6                | 0              | 1.475673                | -1.076324 | 0.336839  |
| 3                | 7                | 0              | 2.424746                | -0.025532 | 0.653976  |
| 4                | 1                | 0              | 3.230453                | -0.455031 | 1.096671  |
| 5                | 6                | 0              | 2.887539                | 0.838973  | -0.447142 |
| 6                | 6                | 0              | 2.166586                | 2.191493  | -0.519096 |
| 7                | 1                | 0              | 2.444354                | 2.621104  | -1.495379 |
| 8                | 6                | 0              | 2.667483                | 3.149212  | 0.574804  |
| 9                | 6                | 0              | 0.617080                | 2.068843  | -0.479897 |
| 10               | 1                | 0              | 0.306513                | 2.242332  | 0.551132  |
| 11               | 6                | 0              | -0.018732               | 3.185323  | -1.331228 |
| 12               | 6                | 0              | 0.038958                | 0.705007  | -0.928757 |
| 13               | 6                | 0              | 0.015759                | -0.533611 | 0.022180  |
| 14               | 6                | 0              | -0.807586               | -0.321200 | 1.355658  |
| 15               | 6                | 0              | -0.289122               | 0.687368  | 2.406203  |
| 16               | 1                | 0              | 0.799822                | 0.684564  | 2.494137  |
| 17               | 1                | 0              | -0.762281               | -1.298696 | 1.855045  |
| 18               | 6                | 0              | -2.280434               | -0.065355 | 1.080563  |
| 19               | 6                | 0              | -2.958179               | -0.501427 | 0.010447  |
| 20               | 6                | 0              | -4.469976               | -0.215612 | -0.175110 |
| 21               | 8                | 0              | -4.965863               | -0.700079 | -1.231858 |
| 22               | 8                | 0              | -5.033207               | 0.453554  | 0.729210  |
| 23               | 6                | 0              | -2.255933               | -1.273248 | -1.074839 |
| 24               | 6                | 0              | -0.795352               | -1.641861 | -0.737394 |
| 25               | 1                | 0              | 2.544416                | -2.523035 | 1.517547  |
| 26               | 1                | 0              | 0.831072                | -2.918668 | 1.330386  |
| 27               | 1                | 0              | 3.958731                | 1.018069  | -0.294121 |
| 28               | 1                | 0              | 2.799031                | 0.316270  | -1.405312 |
| 29               | 1                | 0              | 3.738154                | 3.361793  | 0.460022  |
| 30               | 1                | 0              | 2.133558                | 4.106070  | 0.549074  |
| 31               | 1                | 0              | 2.513856                | 2.705624  | 1.565174  |
| 32               | 1                | 0              | 0.169984                | 3.015007  | -2.399768 |
| 33               | 1                | 0              | -1.103232               | 3.225618  | -1.185552 |
| 34               | 1                | 0              | 0.391712                | 4.169744  | -1.075765 |
| 35               | 1                | 0              | -1.005173               | 0.892714  | -1.187293 |
| 36               | 1                | 0              | 0.525246                | 0.403677  | -1.868234 |
| 37               | 1                | 0              | -2.842967               | 0.490196  | 1.829471  |
| 38               | 1                | 0              | -2.824894               | -2.184196 | -1.292238 |
| 39               | 1                | 0              | -2.308692               | -0.699882 | -2.009844 |
| 40               | 1                | 0              | -0.309839               | -1.890349 | -1.693667 |
| 41               | 1                | 0              | -0.797820               | -2.555205 | -0.127237 |
| 42               | 8                | 0              | 2.016963                | -1.778986 | -0.847078 |
| 43               | 1                | 0              | 1.310685                | -2.285877 | -1.268651 |
| 44               | 1                | 0              | -0.614387               | 1.707463  | 2.183803  |
| 45               | 1                | 0              | -0.723307               | 0.431243  | 3.380636  |
| 46               | 1                | 0              | 1.322673                | -1.637140 | 2.453519  |
| 47               | 8                | 0              | 4.696799                | -2.651805 | -0.734002 |
| 48               | 1                | 0              | 3.767953                | -2.352149 | -0.825290 |
| 49               | 1                | 0              | 4.638858                | -3.591652 | -0.527256 |

FREQUENCIES:

(B3LYP/6-31+G(D,P))

|                | 1       | 2       | 3       |
|----------------|---------|---------|---------|
|                | A       | A       | A       |
| Frequencies -- | 21.4814 | 26.0010 | 30.0055 |
| Red. masses -- | 6.1849  | 4.0833  | 6.6919  |

|            |    |        |        |         |
|------------|----|--------|--------|---------|
| Frc consts | -- | 0.0017 | 0.0016 | 0.0035  |
| IR Inten   | -- | 7.7038 | 2.8617 | 14.2025 |

## structure 13i

ENERGY:

Final Energy in Hartrees: HF = -982.3329737 (B3LYP/6-31+G(D,P))

COORDINATES:

Standard orientation:

| Center<br>Number | Atomic<br>Number | Atomic<br>Type | Coordinates (Angstroms) |           |           |
|------------------|------------------|----------------|-------------------------|-----------|-----------|
|                  |                  |                | X                       | Y         | Z         |
| 1                | 6                | 0              | -1.971467               | 0.201072  | 2.155319  |
| 2                | 6                | 0              | -1.291169               | 0.892014  | 0.955114  |
| 3                | 7                | 0              | -2.308753               | 1.243890  | -0.078222 |
| 4                | 1                | 0              | -3.176733               | 1.446820  | 0.410779  |
| 5                | 6                | 0              | -2.582379               | 0.425697  | -1.269182 |
| 6                | 6                | 0              | -2.834522               | -1.088634 | -1.117013 |
| 7                | 1                | 0              | -2.913282               | -1.448291 | -2.155994 |
| 8                | 6                | 0              | -4.175233               | -1.398339 | -0.431751 |
| 9                | 6                | 0              | -1.642060               | -1.856465 | -0.468747 |
| 10               | 1                | 0              | -1.871076               | -2.027390 | 0.587634  |
| 11               | 6                | 0              | -1.495994               | -3.247253 | -1.113410 |
| 12               | 6                | 0              | -0.310565               | -1.086844 | -0.582048 |
| 13               | 6                | 0              | -0.013182               | 0.161726  | 0.329818  |
| 14               | 6                | 0              | 0.978365                | -0.246444 | 1.488786  |
| 15               | 6                | 0              | 0.684345                | -1.593790 | 2.199272  |
| 16               | 1                | 0              | -0.340606               | -1.700268 | 2.559534  |
| 17               | 1                | 0              | 0.900509                | 0.544688  | 2.248857  |
| 18               | 6                | 0              | 2.428051                | -0.313562 | 1.034150  |
| 19               | 6                | 0              | 2.926548                | 0.055300  | -0.154201 |
| 20               | 6                | 0              | 4.421128                | -0.152892 | -0.509350 |
| 21               | 8                | 0              | 4.744502                | 0.249745  | -1.663025 |
| 22               | 8                | 0              | 5.141478                | -0.695804 | 0.368353  |
| 23               | 6                | 0              | 2.034507                | 0.694559  | -1.182287 |
| 24               | 6                | 0              | 0.734942                | 1.209761  | -0.553346 |
| 25               | 1                | 0              | -2.825260               | 0.820425  | 2.453933  |
| 26               | 1                | 0              | -1.291516               | 0.164133  | 3.006786  |
| 27               | 1                | 0              | -3.464200               | 0.878741  | -1.740939 |
| 28               | 1                | 0              | -1.760877               | 0.570282  | -1.975812 |
| 29               | 1                | 0              | -5.016789               | -0.972374 | -0.992357 |
| 30               | 1                | 0              | -4.341392               | -2.479102 | -0.357991 |
| 31               | 1                | 0              | -4.211705               | -0.993022 | 0.585401  |
| 32               | 1                | 0              | -1.164428               | -3.158967 | -2.155913 |
| 33               | 1                | 0              | -0.756076               | -3.854027 | -0.580434 |
| 34               | 1                | 0              | -2.445638               | -3.796336 | -1.109809 |
| 35               | 1                | 0              | 0.508013                | -1.793934 | -0.424410 |
| 36               | 1                | 0              | -0.203614               | -0.791164 | -1.632650 |
| 37               | 1                | 0              | 3.132935                | -0.750220 | 1.740962  |
| 38               | 1                | 0              | 2.579890                | 1.519217  | -1.653538 |
| 39               | 1                | 0              | 1.842337                | -0.010203 | -2.003928 |
| 40               | 1                | 0              | 0.060725                | 1.572138  | -1.341876 |
| 41               | 1                | 0              | 0.995998                | 2.070151  | 0.071254  |
| 42               | 8                | 0              | -0.905901               | 2.136605  | 1.559102  |
| 43               | 1                | 0              | -0.800144               | 2.811297  | 0.869723  |
| 44               | 1                | 0              | 0.905591                | -2.443877 | 1.545707  |
| 45               | 1                | 0              | 1.350292                | -1.686198 | 3.064438  |
| 46               | 1                | 0              | -2.327700               | -0.804200 | 1.940699  |
| 47               | 8                | 0              | -1.681207               | 3.910384  | -0.867394 |
| 48               | 1                | 0              | -1.945669               | 2.967249  | -0.727516 |
| 49               | 1                | 0              | -0.997176               | 3.894340  | -1.548013 |

FREQUENCIES:

(B3LYP/6-31+G(D,P))

|                | 1<br>A  | 2<br>A  | 3<br>A  |
|----------------|---------|---------|---------|
| Frequencies -- | 39.2423 | 40.0386 | 52.1687 |
| Red. masses -- | 5.8298  | 13.2305 | 5.7661  |

|            |    |        |        |        |
|------------|----|--------|--------|--------|
| Frc consts | -- | 0.0053 | 0.0125 | 0.0092 |
| IR Inten   | -- | 7.5236 | 0.5718 | 1.9894 |

## structure 13j

ENERGY:

Final Energy in Hartrees: HF = -982.3043186 (B3LYP/6-31+G(D,P))

COORDINATES:

Standard orientation:

| Center<br>Number | Atomic<br>Number | Atomic<br>Type | Coordinates (Angstroms) |           |           |
|------------------|------------------|----------------|-------------------------|-----------|-----------|
|                  |                  |                | X                       | Y         | Z         |
| 1                | 6                | 0              | -2.012884               | 0.518226  | 2.060023  |
| 2                | 6                | 0              | -1.266607               | 1.073314  | 0.829303  |
| 3                | 7                | 0              | -2.416158               | 1.151294  | -0.344988 |
| 4                | 1                | 0              | -3.292714               | 1.251721  | 0.166334  |
| 5                | 6                | 0              | -2.589576               | 0.167977  | -1.446544 |
| 6                | 6                | 0              | -2.770355               | -1.300760 | -1.044935 |
| 7                | 1                | 0              | -2.800832               | -1.827947 | -2.011172 |
| 8                | 6                | 0              | -4.120368               | -1.554778 | -0.352022 |
| 9                | 6                | 0              | -1.568953               | -1.896459 | -0.246609 |
| 10               | 1                | 0              | -1.830106               | -1.901160 | 0.815731  |
| 11               | 6                | 0              | -1.356106               | -3.367358 | -0.651480 |
| 12               | 6                | 0              | -0.262122               | -1.103743 | -0.448398 |
| 13               | 6                | 0              | -0.000669               | 0.259065  | 0.290348  |
| 14               | 6                | 0              | 0.983350                | 0.022009  | 1.505095  |
| 15               | 6                | 0              | 0.674698                | -1.196553 | 2.413279  |
| 16               | 1                | 0              | -0.339970               | -1.218388 | 2.816159  |
| 17               | 1                | 0              | 0.912521                | 0.923547  | 2.131900  |
| 18               | 6                | 0              | 2.429750                | -0.133589 | 1.061388  |
| 19               | 6                | 0              | 2.932221                | 0.079991  | -0.163011 |
| 20               | 6                | 0              | 4.417577                | -0.217157 | -0.492787 |
| 21               | 8                | 0              | 4.742873                | 0.014114  | -1.692013 |
| 22               | 8                | 0              | 5.129636                | -0.658550 | 0.446849  |
| 23               | 6                | 0              | 2.052922                | 0.614541  | -1.259648 |
| 24               | 6                | 0              | 0.746883                | 1.196149  | -0.707596 |
| 25               | 1                | 0              | -2.880460               | 1.163110  | 2.243156  |
| 26               | 1                | 0              | -1.362094               | 0.626017  | 2.927459  |
| 27               | 1                | 0              | -3.465873               | 0.498779  | -2.019083 |
| 28               | 1                | 0              | -1.726296               | 0.277291  | -2.102661 |
| 29               | 1                | 0              | -4.961377               | -1.245641 | -0.985042 |
| 30               | 1                | 0              | -4.249217               | -2.618967 | -0.128133 |
| 31               | 1                | 0              | -4.196772               | -1.015834 | 0.599069  |
| 32               | 1                | 0              | -0.988934               | -3.437047 | -1.683283 |
| 33               | 1                | 0              | -0.616250               | -3.848898 | -0.003886 |
| 34               | 1                | 0              | -2.285784               | -3.946161 | -0.586224 |
| 35               | 1                | 0              | 0.574211                | -1.760165 | -0.193933 |
| 36               | 1                | 0              | -0.146697               | -0.948641 | -1.528420 |
| 37               | 1                | 0              | 3.126897                | -0.500188 | 1.814170  |
| 38               | 1                | 0              | 2.606470                | 1.384658  | -1.807752 |
| 39               | 1                | 0              | 1.873056                | -0.171668 | -2.007562 |
| 40               | 1                | 0              | 0.078064                | 1.460312  | -1.539887 |
| 41               | 1                | 0              | 0.971580                | 2.127885  | -0.182470 |
| 42               | 8                | 0              | -0.988177               | 2.370209  | 1.108401  |
| 43               | 1                | 0              | -1.242062               | 3.094215  | 0.199648  |
| 44               | 1                | 0              | 0.853895                | -2.140642 | 1.887761  |
| 45               | 1                | 0              | 1.364914                | -1.181511 | 3.264121  |
| 46               | 1                | 0              | -2.341926               | -0.519181 | 1.990564  |
| 47               | 8                | 0              | -1.775743               | 3.580553  | -0.803605 |
| 48               | 1                | 0              | -2.223601               | 2.145053  | -0.776489 |
| 49               | 1                | 0              | -1.104814               | 3.854514  | -1.440643 |

FREQUENCIES:

(B3LYP/6-31+G(D,P))

|                | 1         | 2       | 3       |
|----------------|-----------|---------|---------|
|                | A         | A       | A       |
| Frequencies -- | -843.9794 | 40.1265 | 42.9404 |
| Red. masses -- | 1.2585    | 9.3474  | 6.9831  |

|            |    |           |        |        |
|------------|----|-----------|--------|--------|
| Frc consts | -- | 0.5282    | 0.0089 | 0.0076 |
| IR Inten   | -- | 1102.5508 | 3.4107 | 6.2303 |

## structure 14

ENERGY:

Final Energy in Hartrees: HF = -982.3479914 (B3LYP/6-31+G(D,P))

COORDINATES:

Standard orientation:

| Center<br>Number | Atomic<br>Number | Atomic<br>Type | Coordinates (Angstroms) |           |           |
|------------------|------------------|----------------|-------------------------|-----------|-----------|
|                  |                  |                | X                       | Y         | Z         |
| 1                | 6                | 0              | 1.448645                | -2.206244 | 1.610934  |
| 2                | 6                | 0              | 1.017370                | -1.650135 | 0.268525  |
| 3                | 7                | 0              | 3.831894                | 0.403859  | 0.314169  |
| 4                | 1                | 0              | 4.506449                | 1.066336  | 0.686944  |
| 5                | 6                | 0              | 3.263162                | 0.883227  | -0.955618 |
| 6                | 6                | 0              | 2.249182                | 2.029807  | -0.766544 |
| 7                | 1                | 0              | 1.906851                | 2.301336  | -1.778812 |
| 8                | 6                | 0              | 2.969782                | 3.261215  | -0.181508 |
| 9                | 6                | 0              | 0.985947                | 1.625467  | 0.051496  |
| 10               | 1                | 0              | 1.351395                | 1.240871  | 1.009176  |
| 11               | 6                | 0              | 0.102014                | 2.862461  | 0.322967  |
| 12               | 6                | 0              | 0.132390                | 0.532079  | -0.669340 |
| 13               | 6                | 0              | -0.251156               | -0.796027 | 0.070490  |
| 14               | 6                | 0              | -1.134320               | -0.644428 | 1.355600  |
| 15               | 6                | 0              | -0.589978               | 0.190820  | 2.535084  |
| 16               | 1                | 0              | 0.437850                | -0.056911 | 2.813673  |
| 17               | 1                | 0              | -1.241569               | -1.669792 | 1.746724  |
| 18               | 6                | 0              | -2.536782               | -0.167634 | 1.010612  |
| 19               | 6                | 0              | -3.145585               | -0.307531 | -0.175761 |
| 20               | 6                | 0              | -4.583875               | 0.222214  | -0.413151 |
| 21               | 8                | 0              | -5.031064               | 0.012597  | -1.575863 |
| 22               | 8                | 0              | -5.142423               | 0.794097  | 0.558790  |
| 23               | 6                | 0              | -2.441377               | -0.972011 | -1.330371 |
| 24               | 6                | 0              | -1.121402               | -1.647534 | -0.928926 |
| 25               | 1                | 0              | 2.068072                | -3.091713 | 1.451160  |
| 26               | 1                | 0              | 0.615526                | -2.438810 | 2.274722  |
| 27               | 1                | 0              | 4.037160                | 1.234163  | -1.663024 |
| 28               | 1                | 0              | 2.771732                | 0.030144  | -1.427085 |
| 29               | 1                | 0              | 3.904154                | 3.452706  | -0.725068 |
| 30               | 1                | 0              | 2.362617                | 4.167848  | -0.247857 |
| 31               | 1                | 0              | 3.219872                | 3.109989  | 0.876218  |
| 32               | 1                | 0              | -0.097649               | 3.402934  | -0.612230 |
| 33               | 1                | 0              | -0.869872               | 2.575221  | 0.731566  |
| 34               | 1                | 0              | 0.566423                | 3.564518  | 1.023334  |
| 35               | 1                | 0              | -0.810823               | 0.990507  | -0.975499 |
| 36               | 1                | 0              | 0.631092                | 0.223735  | -1.594076 |
| 37               | 1                | 0              | -3.108527               | 0.317218  | 1.800715  |
| 38               | 1                | 0              | -3.115482               | -1.710611 | -1.778562 |
| 39               | 1                | 0              | -2.283302               | -0.235189 | -2.129557 |
| 40               | 1                | 0              | -0.516892               | -1.875301 | -1.812705 |
| 41               | 1                | 0              | -1.345447               | -2.607648 | -0.441693 |
| 42               | 8                | 0              | 1.713896                | -1.917676 | -0.713576 |
| 43               | 1                | 0              | 3.413186                | -2.501704 | -0.610317 |
| 44               | 1                | 0              | -0.635945               | 1.261603  | 2.332002  |
| 45               | 1                | 0              | -1.224256               | 0.008166  | 3.410537  |
| 46               | 1                | 0              | 2.070218                | -1.443093 | 2.094753  |
| 47               | 8                | 0              | 4.384087                | -2.646386 | -0.545962 |
| 48               | 1                | 0              | 4.319037                | -0.478705 | 0.164399  |
| 49               | 1                | 0              | 4.664793                | -2.900351 | -1.432674 |

FREQUENCIES:

(B3LYP/6-31+G(D,P))

|                | 1       | 2       | 3       |
|----------------|---------|---------|---------|
|                | A       | A       | A       |
| Frequencies -- | 28.4524 | 38.6377 | 42.6796 |
| Red. masses -- | 4.4098  | 11.2802 | 5.8591  |



|            |    |         |        |        |
|------------|----|---------|--------|--------|
| Frc consts | -- | 0.0021  | 0.0099 | 0.0063 |
| IR Inten   | -- | 10.0393 | 2.4643 | 5.3927 |

---

<sup>1</sup> Quinoline was removed under high vacuum at elevated temperatures (>120 °C) leading to decomposition of

**10.**

<sup>2</sup> Nakamura, S.; Kikuchi, F.; Hashimoto, S. *Angew. Chem. Int. Ed.* **2008**, *47*, 7091-7094.

<sup>3</sup> Frisch, M.J.; Trucks, G.W.; Schlegel, H.B.; Scuseria, G.E.; Robb, M.A.; Cheeseman, J.R.; Scalmani, G.; Barone, V.; Mennucci, B.; Petersson, G.A.; Nakatsuji, H.; Caricato, M.; Li, X.; Hratchian, H.P.; Izmaylov, A.F.; Bloino, J.; Zheng, G.; Sonnenberg, J.L.; Hada, M.; Ehara, M.; Toyota, K.; Fukuda, R.; Hasegawa, J.; Ishida, M.; Nakajima, T.; Honda, Y.; Kitao, O.; Nakai, H.; Vreven, T.; Montgomery Jr., J.A.; Peralta, J.E.; Ogliaro, F.; Bearpark, M.; Heyd, J.J.; Brothers, E.; Kudin, K.N.; Staroverov, V.N.; Kobayashi, R.; Normand, J.; Raghavachari, K.; Rendell, A.; Burant, J.C.; Iyengar, S.S.; Tomasi, J.; Cossi, M.; Rega, N.; Millam, N.J.; Klene, M.; Knox, J.E.; Cross, J.B.; Bakken, V.; Adamo, C.; Jaramillo, J.; Gomperts, R.; Stratmann, R.E.; Yazyev, O.; Austin, A.J.; Cammi, R.; Pomelli, C.; Ochterski, J.W.; Martin, R.L.; Morokuma, K.; Zakrzewski, V.G.; Voth, G.A.; Salvador, P.; Dannenberg, J.J.; Dapprich, S.; Daniels, A.D.; Farkas, Ö.; Foresman, J.B.; Ortiz, J.V.; Cioslowski, J.; Fox, D.J. Gaussian 09, Revision A.2, Gaussian Inc., Wallingford CT, USA (<http://www.gaussian.com>).

<sup>4</sup> Lee, C.; Yang, W.; Parr, R.G. *Phys. Rev. B* **1988**, *37*, 785-789.

<sup>5</sup> Becke, A.D. *J. Chem. Phys.* **1993**, *98*, 5648-5652.

<sup>6</sup> Pettersen, E.F.; Goddard, T.D.; Huang, C.C.; Couch, G.S.; Greenblatt, D.M.; Meng, E.C.; Ferrin, T.E. *J. Comput. Chem.* **2004**, *25*, 1605-1612.
